# Supplementary material for: Faecal microbiota transplant to ERadicate gastrointestinal carriage of Antibiotic Resistant Organisms (FERARO): a prospective, randomised placebo-controlled feasibility trial
Source: PubMed Central journal article supplement (PMC7252984; doi:10.1136/bmjopen-2020-038847), 2020-05-25
Supplement: bmjopen-2020-038847.draft_revisions.pdf [file bmjopen-2020-038847.draft_revisions.pdf]

# BMJ Open

BMJ Open is committed to open peer review. As part of this commitment we make the peer review history of every article we publish publicly available.

When an article is published we post the peer reviewers' comments and the authors' responses online. We also post the versions of the paper that were used during peer review. These are the versions that the peer review comments apply to.

The versions of the paper that follow are the versions that were submitted during the peer review process. They are not the versions of record or the final published versions. They should not be cited or distributed as the published version of this manuscript.

BMJ Open is an open access journal and the full, final, typeset and author-corrected version of record of the manuscript is available on our site with no access controls, subscription charges or pay-per-view fees (<http://bmjopen.bmj.com>).

If you have any questions on BMJ Open's open peer review process please email [info.bmjopen@bmj.com](mailto:info.bmjopen@bmj.com)

# BMJ Open

**Protocol: A prospective, randomised placebo-controlled feasibility trial of Faecal microbiota Transplant to ERadicate gastrointestinal carriage of Antibiotic Resistant Organisms (FERARO)**

|                               |                                                                                                                                                                                                                                                                                                                                                                                                                                                                                                                                                                                                                                                                                                                                                                                                                                                                                                                                                                                                                                                                                                                                                                                                                                                                                                                                                                                                                                                                                      |
|-------------------------------|--------------------------------------------------------------------------------------------------------------------------------------------------------------------------------------------------------------------------------------------------------------------------------------------------------------------------------------------------------------------------------------------------------------------------------------------------------------------------------------------------------------------------------------------------------------------------------------------------------------------------------------------------------------------------------------------------------------------------------------------------------------------------------------------------------------------------------------------------------------------------------------------------------------------------------------------------------------------------------------------------------------------------------------------------------------------------------------------------------------------------------------------------------------------------------------------------------------------------------------------------------------------------------------------------------------------------------------------------------------------------------------------------------------------------------------------------------------------------------------|
| Journal:                      | <i>BMJ Open</i>                                                                                                                                                                                                                                                                                                                                                                                                                                                                                                                                                                                                                                                                                                                                                                                                                                                                                                                                                                                                                                                                                                                                                                                                                                                                                                                                                                                                                                                                      |
| Manuscript ID                 | bmjopen-2020-038847                                                                                                                                                                                                                                                                                                                                                                                                                                                                                                                                                                                                                                                                                                                                                                                                                                                                                                                                                                                                                                                                                                                                                                                                                                                                                                                                                                                                                                                                  |
| Article Type:                 | Protocol                                                                                                                                                                                                                                                                                                                                                                                                                                                                                                                                                                                                                                                                                                                                                                                                                                                                                                                                                                                                                                                                                                                                                                                                                                                                                                                                                                                                                                                                             |
| Date Submitted by the Author: | 26-Mar-2020                                                                                                                                                                                                                                                                                                                                                                                                                                                                                                                                                                                                                                                                                                                                                                                                                                                                                                                                                                                                                                                                                                                                                                                                                                                                                                                                                                                                                                                                          |
| Complete List of Authors:     | <p>Merrick, Blair; Guy's and Saint Thomas' Hospitals NHS Trust, Centre for Clinical Infection and Diagnostics Research; King's College London Faculty of Life Sciences and Medicine</p> <p>Robinson, Emily; King's College London, School of Population Health and Environmental Sciences</p> <p>Bunce, Catey; King's College London, Primary Care and Public Health Sciences</p> <p>Allen, Liz; Guy's and Saint Thomas' Hospitals NHS Trust; IQVIA Reading</p> <p>BIsnauthsing, Karen; Guy's and Saint Thomas' Hospitals NHS Trust, Centre for Clinical Infection and Diagnostics Research</p> <p>Izundu, Chi Chi</p> <p>Bell, Jordana; King's College London Faculty of Life Sciences and Medicine</p> <p>Amos, Gregory; National Institute for Biological Standards and Control</p> <p>Shankar-Hari, Manu; Guy's and Saint Thomas' Hospitals NHS Trust, Intensive Care Unit; King's College London Faculty of Life Sciences and Medicine, Division of Asthma, Allergy and Lung Biology</p> <p>Goodman, Anna; Guy's and Saint Thomas' NHS Foundation Trust, Centre for Clinical Infection and Diagnostics Research; King's College London Faculty of Life Sciences and Medicine</p> <p>Shawcross, Debbie ; King's College London Faculty of Life Sciences and Medicine, Hepatology</p> <p>Goldenberg, Simon; Guy's and Saint Thomas' NHS Foundation Trust, Centre for Clinical Infection and Diagnostics Research; King's College London Faculty of Life Sciences and Medicine</p> |
| Keywords:                     | BACTERIOLOGY, Microbiology < BASIC SCIENCES, Infection control < INFECTIOUS DISEASES                                                                                                                                                                                                                                                                                                                                                                                                                                                                                                                                                                                                                                                                                                                                                                                                                                                                                                                                                                                                                                                                                                                                                                                                                                                                                                                                                                                                 |
|                               |                                                                                                                                                                                                                                                                                                                                                                                                                                                                                                                                                                                                                                                                                                                                                                                                                                                                                                                                                                                                                                                                                                                                                                                                                                                                                                                                                                                                                                                                                      |

SCHOLARONE™  
Manuscripts

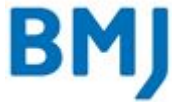

I, the Submitting Author has the right to grant and does grant on behalf of all authors of the Work (as defined in the below author licence), an exclusive licence and/or a non-exclusive licence for contributions from authors who are: i) UK Crown employees; ii) where BMJ has agreed a CC-BY licence shall apply, and/or iii) in accordance with the terms applicable for US Federal Government officers or employees acting as part of their official duties; on a worldwide, perpetual, irrevocable, royalty-free basis to BMJ Publishing Group Ltd ("BMJ") its licensees and where the relevant Journal is co-owned by BMJ to the co-owners of the Journal, to publish the Work in this journal and any other BMJ products and to exploit all rights, as set out in our [licence](#).

The Submitting Author accepts and understands that any supply made under these terms is made by BMJ to the Submitting Author unless you are acting as an employee on behalf of your employer or a postgraduate student of an affiliated institution which is paying any applicable article publishing charge ("APC") for Open Access articles. Where the Submitting Author wishes to make the Work available on an Open Access basis (and intends to pay the relevant APC), the terms of reuse of such Open Access shall be governed by a Creative Commons licence – details of these licences and which [Creative Commons](#) licence will apply to this Work are set out in our licence referred to above.

Other than as permitted in any relevant BMJ Author's Self Archiving Policies, I confirm this Work has not been accepted for publication elsewhere, is not being considered for publication elsewhere and does not duplicate material already published. I confirm all authors consent to publication of this Work and authorise the granting of this licence.

1  
2  
3 Protocol: A prospective, randomised placebo-controlled feasibility trial of Faecal microbiota  
4 Transplant to ERadicate gastrointestinal carriage of Antibiotic Resistant Organisms (FERARO)  
5  
6  
7  
8

9 Blair Merrick<sup>1</sup>, Emily Robinson<sup>2</sup>, Catey Bunce<sup>2</sup>, Liz Allen<sup>3,4</sup>, Karen Bisnauthsing<sup>1</sup>, Chi Chi  
10 Izundu<sup>5</sup>, Jordana Bell<sup>6</sup>, Gregory CA Amos<sup>7</sup>, Manu Shankar-Hari<sup>8</sup>, Anna Goodman<sup>1</sup>, Debbie L  
11 Shawcross<sup>9</sup>, Simon D Goldenberg<sup>1\*</sup>  
12  
13  
14

15 **Author affiliations**  
16

17 <sup>1</sup>Centre for Clinical Infection and Diagnostics Research, King's College, London and Guy's & St Thomas' NHS  
18 Foundation Trust, London, UK

19 <sup>2</sup>School of Population Health and Environmental Sciences, King's College London, UK

20 <sup>3</sup> Early Clinical Development Centre of Excellence, IQVIA, Reading UK

21 <sup>4</sup> Department of Pharmacy, Guy's and St Thomas' NHS Foundation Trust, London, UK

22 <sup>5</sup> Patient and Public Representative, London, UK

23 <sup>6</sup> Department of Twin Research and Genetic Epidemiology, King's College, London, UK

24 <sup>7</sup> National Institute for Biological Standards and Control, Potters Bar, Hertfordshire, UK

25 <sup>8</sup> Department of Infectious Diseases, School of Immunology and Microbial Sciences, Faculty of Life Sciences  
26 and Medicine, King's College, London and Guy's and St Thomas' NHS Foundation Trust, London, UK

27 <sup>9</sup> Institute of Liver Studies, Inflammation Biology, School of Immunology and Microbial Sciences, Faculty of Life  
28 Sciences and Medicine, King's College London, London, UK

29 \* Corresponding author  
30  
31

32 [Blair.merrick@gstt.nhs.uk](mailto:Blair.merrick@gstt.nhs.uk)

33 [Emily.robinson@kcl.ac.uk](mailto:Emily.robinson@kcl.ac.uk)

34 [Catey.bunce@kcl.ac.uk](mailto:Catey.bunce@kcl.ac.uk)

35 [Liz.allen@iqvia.com](mailto:Liz.allen@iqvia.com)

36 [Karen.bisnauthsing@gstt.nhs.uk](mailto:Karen.bisnauthsing@gstt.nhs.uk)

37 [Chi.chi.izundu@bbc.co.uk](mailto:Chi.chi.izundu@bbc.co.uk)

38 [Jordana.bell@kcl.ac.uk](mailto:Jordana.bell@kcl.ac.uk)

39 [Gregory.amos@nibsc.org](mailto:Gregory.amos@nibsc.org)

40 [Manu.shankar-hari@kcl.ac.uk](mailto:Manu.shankar-hari@kcl.ac.uk)

41 [Anna.goodman@gstt.nhs.uk](mailto:Anna.goodman@gstt.nhs.uk)

42 [Debbie.shawcross@kcl.ac.uk](mailto:Debbie.shawcross@kcl.ac.uk)

43 [Simon.goldenberg@gstt.nhs.uk](mailto:Simon.goldenberg@gstt.nhs.uk)  
44  
45  
46

47 **Keywords:** antimicrobial resistance, extended spectrum beta-lactamases, carbapenemase  
48 producing enterobacteriales, microbiome, faecal microbiota transplantation  
49

50 **Word count:** 3949  
51  
52  
53  
54  
55  
56  
57  
58  
59  
60

## **Abstract**

**Introduction:** antimicrobial resistance (AMR) is rising, largely due to the indiscriminate use of antimicrobials. The human gut is the largest reservoir of antibiotic resistant bacteria (ARB). Individuals colonised with ARB have the potential to spread these organisms both in the community and hospital settings. Infections with ARB such as extended spectrum beta-lactamase producing enterobacteriales (ESBL-E) and carbapenemase producing enterobacteriales (CPE) are more difficult to treat and are associated with an increased morbidity and mortality. Presently there is no effective decolonisation strategy for these ARB. Faecal microbiota transplant (FMT) has emerged as a potential strategy for decolonisation of ARB from the human gut, however there is significant uncertainty about the feasibility, effectiveness and safety of using this approach.

**Methods and analysis:** prospective, randomised, patient-blinded, placebo-controlled feasibility trial of FMT to eradicate gastrointestinal carriage of ARB. Eighty patients with a recent history of invasive infection secondary to ESBL-E or CPE and persistent gastrointestinal carriage will be randomised 1:1 to receive encapsulated FMT or placebo. The primary outcome measure is consent rate (as a proportion of patients who fulfil inclusion/ exclusion criteria); this will be used to determine if a substantive trial is feasible. Participants will be followed up at 1 week, 1 month, 3 months and 6 months and monitored for adverse events as well as gastrointestinal carriage rates of ARB after intervention.

**Ethics and dissemination:** research ethics approval was obtained by London - City & East Research Ethics Committee (ref 20/LO/0117).

**Trial registration number:** ISRCTN registration number 34467677 and EudraCT number 2019-001618-41 protocol version 1.1. (dated 23/02/2020)

## **Strengths and limitations of this study**

- This is one of the first trials to assess the feasibility of FMT as a possible treatment for antimicrobial resistance
- The randomised, placebo-controlled design will control for spontaneous loss of carriage of resistant organisms
- The use of a capsulized FMT preparation with a single face-to-face follow up visit, places a low burden on patients to participate
- Qualitative data from participant focus groups will inform and influence a potential future trial
- This study will assess feasibility; however it is not statistically powered to assess clinically efficacy, which will need to be evaluated in a substantive trial
- Mechanistic outcomes using metagenomic, metabolomic and host immune analyses could provide insight into the mechanism of action of FMT in treatment responders
- The lack of investigator blinding, and the single centre design is a limitation

## **Introduction**

Antimicrobial resistance (AMR) in enterobacteriales is increasing, fuelled by the indiscriminate use of antimicrobials and inadequate infection control practices. Of greatest concern are extended spectrum beta-lactamase producing (ESBL-E) and carbapenemase producing enterobacteriales (CPE). Rates of ESBL producing bacteria carriage in our local population are 9%, with the majority being CTX-M type (1). Rates of detection and infections caused by ESBL-E/ CRE are increasing nationally and globally (2, 3), resulting in a significant burden of attributable death and disability adjusted life years (4). Antimicrobial resistant bacteria (ARB) such as ESBL-E/ CPE have the capacity to spread between individuals and between organisms through horizontal gene transfer. These organisms have been responsible for several large and prolonged outbreaks worldwide (5-7). As well as increased morbidity and mortality, infection with resistant organisms is associated with prolonged hospital stay and increased healthcare costs (4, 8, 9). Hospitalised patients are particularly at risk of acquiring these organisms due to the treatments and procedures they receive, their comorbidities, and their high exposure to antimicrobials (5).

The microbiota of the human gut is a complex ecosystem and the largest reservoir of ARB (10, 11). A better understanding of the human microbiome has led to a new appreciation for the role indigenous microbes play in protecting us from invading exogenous pathogens. The role of the gut microbiota in defending the host against gastrointestinal pathogens was first described in a mouse model in which streptomycin administered orally to disrupt the gut microbiota resulted in increased rate of *Salmonella enterica*-related infections (12). Antimicrobials disrupt the balance of the delicate gut ecosystem, enabling colonisation by ESBL-E/ CPE and other potential pathogens. This is most strikingly evident in patients suffering from *Clostridioides difficile* infection (CDI), and the remarkable success of modulating this with faecal microbiota transplantation (FMT) (13, 14).

Attempts to control carriage of ARB in the gut using selective digestive decolonisation (SDD) are controversial, have not been widely adopted, and is not recommended by expert groups (15). Loss of ARB colonisation has been observed in a number of patients when using FMT to treat recurrent CDI (16). However, these reports are nearly all case series which are uncontrolled and do not account for spontaneous loss of carriage, which can occur in up to 50% of patients following hospital discharge (17).

The only published randomised trial of FMT to eradicate gastrointestinal carriage of ESBL-E and CPE was conducted in four academic centres in Geneva, Paris, Utrecht and Tel Aviv (18). Patients were randomised in a 1:1 ratio to a five-day course of colistin and neomycin followed by FMT or no intervention. The primary outcome measure was culture of ESBL-E / CPE from stool 35-48 days following randomisation, which was achieved for 41% (9/22) of patients in the intervention arm vs. 29% (5/17) in the control arm. Although the odds ratio for decolonisation success for FMT was 1.7 (95% confidence interval 0.4-6.4), this was not statistically significant, leaving the authors to conclude that the results do not support the routine use of FMT for decolonisation. Although the study was multicentre and included a control group to account for spontaneous loss of carriage, there are several limitations with the design and conduct, making it difficult to draw firm conclusions. Firstly, although designed as a superiority trial with a sample size calculation of 32 in each group, only 39

(61%) patients in total were randomised (due to recruitment problems). Secondly, patients in the intervention arm received five days of colistin and neomycin in addition to FMT, whereas the controls received no intervention. Thus, it is impossible to determine whether the results were due to the antibiotics (likely to have a profound effect on the gut flora) vs. FMT. Thirdly, the methods of administration of FMT varied according to recruiting site; capsules were administered in two centres (16 patients), whilst two used nasogastric administration (6 patients). The capsules (15 administered each day over two days) were produced from one donation derived from 15-30g faeces. The nasogastric preparation was derived from 40g. There is evidence in the context of recurrent CDI that FMT preparations made with less than 50g faeces result in poorer outcomes than those made with more than this amount (19). Thus, a question exists over whether the patients were under dosed, and if repeated administrations (perhaps using different donors) might be more effective. Lastly, the study was not placebo controlled or blinded, although the primary outcome of stool culture at one month is fairly objective, there is the possibility of introducing bias in an investigator who is aware of the allocation.

Due to the limitations of the above study, the lack of other rigorously conducted, well controlled studies, and the considerable doubt that sufficient patients would be willing to participate in research of this type, we designed a feasibility study to address some of the outstanding questions.

## **Methods and analysis**

### **Primary objectives**

The primary objective of this study is to determine the feasibility and acceptability of administering encapsulated FMT to participants colonised with ESBL-E / CPE. This will be used to determine if a substantive trial is feasible.

### **Primary endpoints**

The primary outcome measure is consent rate (as a proportion of patients who fulfil inclusion/ exclusion criteria). The success criteria for the primary endpoint are stratified. If <15% is achieved, progression to a substantive trial will not be deemed feasible. If 15-39%, progression to a substantive trial will be deemed feasible with protocol modifications and clearly defined stop/go criteria. An overall consent rate of >40% will be taken as indicating a substantive trial is feasible.

### **Secondary objectives**

The secondary objectives are to assess other feasibility aspects of conducting a substantive trial, to evaluate the safety and tolerability of FMT in this patient population, and to provide early evidence of efficacy. These measures should inform a future trial, such as determining the primary (efficacy) outcome and sample size, if progression criteria are met. A full list of criteria for progression to a substantive trial are details in Table 1 of supplementary file.

### **Secondary feasibility endpoints**

- Proportion of patients fulfilling inclusion / exclusion criteria
- Proportion of patients receiving FMT / placebo (as a % of those consenting)
- Proportion of patients returning for follow up visits (face to face visit at Day 40)

- Proportion of patients providing follow up stool samples (Days 10, 40, 100 and 190)
- Ability to recruit sufficient healthy donors to manufacture all FMT doses to meet demands of this and a future substantive RCT. Assessed by delay in dosing patients (measured in days)

#### **Additional feasibility assessments will include:**

- Collection of data that may be used in estimating of costs/resources needed to provide FMT in the NHS.
- An embedded qualitative study to explore views and experiences of research participants.

#### **Secondary efficacy endpoints**

- Gastrointestinal carriage of CRE / ESBL (detected / not detected) by stool culture over time (days 10, 40, 100 and 190)
- Gastrointestinal carriage of CRE / ESBL (detected / not detected) by multiplex PCR over time (days 10, 40, 100 and 190)

#### **Secondary safety and tolerability endpoints**

- proportion of patients experiencing reflux following administration of FMT
- Proportion of patients suffering intolerable (resulting in withdrawal from the study) gastrointestinal side effects (including diarrhoea, constipation, abdominal pain, flatulence and bloating). This will be assessed by direct questioning and completion of a short patient questionnaire.
- identification of unanticipated harms involved with administration of FMT.
- occurrence of any adverse event / serious adverse event

#### **Exploratory endpoints/outcomes**

The following exploratory / mechanistic outcomes will be measured:

- Changes in the gut microbiome induced by capsulized FMT as measured by comparing between treatment groups change (relative to baseline) in;
  - the proportion and relative abundance of bacterial taxa over time (days 10, 40, 100 and 190)
  - the change in diversity of the microbiome over time (days 10, 40, 100 and 190) measured using Shannon and Simpson indices
  - antibiotic resistance genes carriage over time (days 10, 40, 100 and 190)
- Changes in the gut metabolome induced by capsulized FMT (using Nuclear Magnetic Resonance (NMR) spectroscopy). Measured at days 10, 40, 100 and 190.
- Host immune response T and B cell) as measured by comparing participants prior to and day 40, as well as donors who will act as controls.

#### **Trial design**

Randomised control participant-blinded, single-centre, feasibility trial with two parallel groups (FMT capsules and matched placebo). Eighty patients will be randomised 1:1 (40 will receive FMT capsules and 40 placebo) from eligible patients identified from Guy's and St Thomas' hospitals (figure 1 & table 1).



### **Patient and public involvement**

Patients and the public have identified antimicrobial resistance as a research priority and were involved in identifying the research question and providing feedback on the grant application. A patient representative has been appointed to the Trial Steering Committee (TSC), and has advised on the design of the research, the protocol and all patient facing materials. The patient representative will also be involved in dissemination of the study findings. As the acceptability of FMT in this setting is a key research question we will invite up to eight patients to participate in focus groups. The aim of the group will be to understand their experience in participation in the study and will focus on acceptability, barriers to participation and improvements that could be made to any resulting substantive trial.

### **Patient population**

Participants will be recruited from Guy's and St Thomas' NHS Foundation Trust, a 1200 bed academic centre in central London. It is anticipated that most patients will already be admitted to the hospital as part of standard of care treatment, thus, most activities will take place on the ward or clinical area that the patient is already located. Where this is not the case, participants will be invited to attend the infection clinical room on an outpatient basis.

### **Consent**

Informed consent (for both healthy donors and patient-recipients) will be obtained prior to any trial related activities, including screening for eligibility. Potential participants will be given the participant information sheet (PIS) and allowed enough time to read thoroughly and discuss with others outside of the study team (e.g. family, friends, general practitioner) (see online supplementary file table 2). Participants are free to withdraw from the trial at any time without giving reasons. Data and samples collected up to the point of withdrawal will only be used after withdrawal if the participant consented for this. Patients who lack capacity will not be enrolled in this study. Where a participant consents but later becomes incapacitated, the original consent given endures the loss of capacity, providing that the trial has not significantly altered.

### **Randomisation**

The randomisation schedule will be generated using a validated online randomisation programme, hosted by King's Clinical Trials Unit. The method of randomisation will be block randomisation with randomly varying block sizes. As this is a single centre study, randomisation does not need to be stratified. Participants will be allocated treatment as close as possible to receiving it.

### **Study intervention**

FMT for this trial will be prepared in a lyophilised, encapsulated form in accordance with Good Manufacturing Practice (GMP) principles and under manufacturing authorisation for an Investigational Medicinal Product (IMP) from the Medicines and Healthcare Products Regulatory Agency (MHRA). Our centre has recently provided FMT for a CTIMP for cirrhosis and this follows similar processes (20). Healthy donor inclusion and exclusion criteria and screening and eligibility questionnaire are described in Tables 3 and 4 of the supplementary file.

1  
2  
3 The product contains 0.9% sodium chloride and 5% trehalose (cryoprotectant) as excipients.  
4 A minimum of 80g faeces from each donor will be used to manufacture one batch of five  
5 capsules. Following lyophilisation, the material will be encapsulated in five size 0 delayed  
6 release methylcellulose capsules (DRcaps™, Capsugel®, Livingston, UK). Placebo capsules  
7 will contain microcrystalline cellulose. The capsules for the FMT and placebo will be  
8 identical in appearance. The capsules are coloured Swedish orange, resulting in an opaque  
9 appearance through which the contents cannot be seen.  
10  
11  
12

13 FMT donors are carefully screened healthy volunteers with a body mass index between 18-  
14 30. Donors undergo questionnaire screening for risk factors and testing for a range of  
15 infectious agents as previously described and in accordance with national guidelines (see  
16 appendix A for full details) (21). FMT material is traceable from donor to recipient. Aliquots  
17 of donor stool will be kept for 30 years to allow for future testing if required.  
18  
19

20 At baseline participants will have their medication history recorded, including over the  
21 counter preparations and supplements as well as pre/probiotics. Vital signs, height and  
22 weight, and baseline blood biochemistry and haematology will be collected. Additionally, a  
23 serum sample will be stored to allow future testing in the event of a possible transmission  
24 event. If female and of child-bearing age a urinary pregnancy test will be performed. An EQ-  
25 5D questionnaire will also be administered.  
26  
27  
28

29 Encapsulated FMT (IMP) and placebo will be dispensed by study staff to trial participants  
30 over three consecutive days (or over five days if over a weekend). Patients will be fasted for  
31 4 hours and be pre-treated with omeprazole on the morning on the FMT (40mg on first  
32 dosing day and 20mg on the two subsequent dosing days).  
33

34 It is anticipated that most patients will remain an inpatient for the duration of treatment. If  
35 they have been discharged in the interim provision will be made for them to attend for  
36 treatment as an outpatient.  
37  
38

### 39 **Evaluations during and after treatment**

40 Follow up events will be scheduled for all participants at 1 week, 1 month, 3 months and 6  
41 months after end of therapy. If an outpatient, the visits at 1 week, 3 months and 6 months  
42 will be conducted by telephone, with the participant returning a stool sample by post. The  
43 follow-up at 1 month will be face to face and will include a blood sample for immune  
44 analyses. All visits will involve completion of an EQ-5D questionnaire (see figure 2 for  
45 additional details).  
46  
47  
48

### 49 **Sample analyses**

50 Stool samples will be analysed for the presence of ESBL-E/ CPE using culture based  
51 (chromogenic agar with species identification using MALDI-ToF mass spectrometry and  
52 phenotypic antimicrobial susceptibility testing) and molecular techniques (multiplex PCR  
53 panel for 16 ESBL/ CPE resistance genes).  
54  
55

### 56 **Follow-up**

57 If a participant fails to present for follow up assessment, all attempts to contact the  
58 participant and information received during contact attempts will be documented in the  
59 participant's medical record. In any circumstance, every effort will be made to contact the  
60

1  
2  
3 participant and document outcome (i.e. three documented contact attempts via phone  
4 calls, on separate occasions will be made to locate or contact the participant, and/or  
5 determine health status). Stool samples will be stored for further follow-on analysis,  
6 including metagenomics and metabolomics profiling.  
7  
8

### 9 **Qualitative study**

10 A qualitative study of participant's experiences will be undertaken and comprises a focus  
11 group with a minimum of eight participants. Ideally the group will include at least two  
12 patients who were approached but did not agree to participate. The aim of these  
13 discussions is to identify facilitators and barriers to delivering the trial, and whether there  
14 are any aspects of the trial that should be changed.  
15  
16

17 Objectives of the focus group will be;  
18

- 19 • Identifying ways of increasing recruitment and retention
- 20 • Identifying ways of broadening participation in the trial to improve diversity of
- 21 population
- 22 • Improving understanding of how participants join trials and experience of
- 23 participation
- 24 • Measuring reasons for non-adherence to the trial medication
- 25 • Exploring stakeholders' views of acceptability of the trial design
- 26 • Strengthening the ethical conduct of the trial, for example, informed consent
- 27 procedures
- 28 • Addressing any local issues which may impact on the feasibility of a substantive trial
- 29 • Understanding how the trial affects different stakeholders, for example, workload
- 30  
31  
32  
33  
34  
35  
36  
37

### 38 **Statistical analysis**

#### 39 **Sample size**

40  
41 As this is a feasibility study, significance tests between or within groups will not be performed  
42 for the study's primary and secondary endpoints, therefore a power calculation has not been  
43 performed. For feasibility and pilot studies, sample sizes between 24 and 50 have been  
44 recommended to estimate a chosen parameter (22, 23). We have chosen a 1:1 treatment to  
45 placebo ratio, therefore a total sample size of 80 would be enough to estimate the standard  
46 deviation of the outcome in 40 treated patients, allowing for some loss to follow-up. We will  
47 also be able to estimate our expected recruitment rate of 40% (95% CI: 33-47) if we approach  
48 around 200 eligible patients.  
49  
50  
51  
52

#### 53 **Data synthesis, analysis and presentation**

54 A Statistical Analysis Plan will be written by the trial statistician and signed off prior to  
55 database lock. The study will be reported in accordance with the CONSORT extension for  
56 pilot and feasibility studies.  
57  
58  
59  
60

1  
2  
3 The proportion of patients who accept the offer of randomisation will be reported with 95%  
4 confidence intervals computed by the exact binomial method. No statistical tests for  
5 significant differences between treatment groups will be performed. In addition to summary  
6 statistics of the secondary outcomes, all harms and withdrawals will be reported with 95%  
7 confidence intervals. Patients will be analysed in the groups to which they are randomised  
8 in accordance with intent to treat principals.  
9  
10

11 The protocol has been designed to place minimal burden upon patients and case report  
12 forms are only capturing essential data. It is inevitable that there may be some missing  
13 data, which will be reported by treatment group with reasons for missingness described,  
14 where possible. Since this is a feasibility study, we do not plan to impute missing data.  
15  
16

### 17 **Statistical software**

18 All statistical analysis will be conducted using Stata version 15.0 or above (StatCorp, Texas).  
19  
20

### 21 **Trial monitoring groups**

#### 22 **Trial Management Group (TMG)**

23  
24 Comprises the chief investigator (CI), trial statistician, trial staff and other lead clinical and  
25 non-clinical co-investigators and co-applicants. The TMG are responsible for the day-to-day  
26 management of the trial and to ensure all practical details of the trial are progressing and  
27 working well. The TMG will monitor all aspects of the conduct and progress of the trial,  
28 ensuring that the protocol is adhered to and take appropriate action to safeguard  
29 participants and the quality of the trial itself. The TMG will be responsible for drafting of the  
30 final report and submission for publication.  
31  
32  
33

#### 34 **Trial Steering Committee (TSC)**

35 A Trial Steering Committee (TSC) will be convened with membership nominated by the CI in  
36 partnership with the sponsor. The role of the TSC is to provide overall supervision for the  
37 trial on behalf of the sponsor and funder and to ensure that the project is conducted to the  
38 rigorous standards set out in the Department of Health and Social Care's Research  
39 Governance Framework for Health and Social Care and the Guidelines for Good Clinical  
40 Practice. The committee Chair will be independent of the study. The committee will also  
41 comprise four other independent members (Consultant Microbiologists or  
42 Gastroenterologists) a patient/public representative, and an independent statistician.  
43 The TSC will take responsibility for monitoring data and making recommendations to the  
44 TMG on whether there are any ethical or safety reasons why the trial should not continue. A  
45 separate Data Monitoring and Ethics Committee (DMEC) will not be established as this is a  
46 single centre feasibility trial with a relatively small number of patients using an established  
47 IMP with a relatively well described safety profile.  
48  
49  
50  
51  
52  
53

### 54 **Ethics and dissemination**

55 Research ethics approval was obtained by London - City & East Research Ethics Committee  
56 (ref. 20/LO/0117). Trial results will be published in a peer-reviewed journal and presented at  
57 international conferences.  
58  
59

### 60 **Discussion**

1  
2  
3  
4  
5  
6  
7  
8  
9  
10  
11  
12  
13  
14  
15  
16  
17  
18  
19  
20  
21  
22  
23  
24  
25  
26  
27  
28  
29  
30  
31  
32  
33  
34  
35  
36  
37  
38  
39  
40  
41  
42  
43  
44  
45  
46  
47  
48  
49  
50  
51  
52  
53  
54  
55  
56  
57  
58  
59  
60

Several case reports and one randomised controlled trial of ARB decolonisation using FMT are summarised in four systematic reviews (16, 24-26). Most studies were case reports or case series which did not control for spontaneous loss of ARB carriage. This is important since it may be significant and may lead to overestimation of the effectiveness of FMT in achieving decolonisation. In a recent study conducted at Central Manchester Foundation Trust during 2016/17 only 17.1% of patients who were previously known to be colonised with CRE had it detected on readmission to the hospital (27). Therefore, the use of a placebo in this trial is justified and crucial to control for spontaneous loss of carriage.

Capsule administration has been selected following consultation with patient groups. It is more acceptable and cost effective than other methods of administration such as via nasojejun tube.

Although the underlying mechanism of action of FMT is not fully elucidated, the use of three different donors is justified as it likely increases the bacterial diversity in the administered IMP, with the hope that this will engraft in the recipient. The previous study using a single donor resulted in an odds ratio for decolonisation success of 1.7 (95% CI 0.4-6.4). We hypothesize that using multiple donors at three dosing points will result in a higher rate of decolonisation. This is also based on experience of using FMT to treat patients with ulcerative colitis, where multiple donors are used in prolonged treatment intervals of up to six weeks (28-31).

The overall aim of this programme of work (which would proceed to a future substantive RCT if feasible) is to eradicate or suppress ESBL-E / CRE without resorting to the use of antibiotics. If that can be achieved, then the risk of an invasive infection with ARB in these patients could be significantly reduced.

#### **Acknowledgements**

EJR receives salary support from the NIHR Biomedical Research Centre based at Guy's and St Thomas' NHS Foundation Trust and King's College, London

#### **Collaborators**

Annapurna Vyakarnam, David Moyes, James Mason

#### **Contributors**

SG and BM conceived and designed the trial, drafting of the manuscript  
EJR and CB designed the statistical aspects of the study.  
MSH designed the exploratory immunology aspects of the study.  
GCAA and JB designed exploratory microbiome aspects of the study.  
DLS is Chair of the Trial Steering Committee and provided expert advice.  
CCI provided input from the patient and public perspective.  
All authors reviewed and approved the final manuscript.

#### **Sponsor**

The study sponsor is Guy's and St Thomas' NHS Foundation Trust, Great Maze Pond, London SE1 9RT. The sponsor had no role in the design of this study and will not have any role during its execution, analyses, interpretation of the data, or decision to submit results.

#### **Funding**

1  
2  
3 This independent research is supported by the National Institute for Health Research (NIHR) under its  
4 Research for Patient Benefit (RfPB) Programme (grant reference number PB-PG-0418-20007). The funder had  
5 no role in the design of this study and will not have any role during its execution, analyses, interpretation of  
6 the data, or decision to submit results.  
7  
8

9 **Competing interests**

10 SDG has received personal fees from Astellas, Enterobiotix, Menarini, MSD, Pfizer and Shionogi.  
11 DLS has undertaken paid consultancy for Norgine Ltd, Shionogi and Kaleido Biosciences and paid lectures for  
12 Falk Pharma, Norgine Ltd and Alfa Sigma  
13 All other authors report no competing interests.  
14  
15

16 **Patient consent for publication**

17 Not required.  
18

19 **Ethics approval**

20 Research ethics approval was given by London - City & East Research Ethics Committee  
21 (ref. 20/LO/0117).  
22  
23  
24  
25  
26  
27  
28  
29  
30  
31  
32  
33  
34  
35  
36  
37  
38  
39  
40  
41  
42  
43  
44  
45  
46  
47  
48  
49  
50  
51  
52  
53  
54  
55  
56  
57  
58  
59  
60

## References

1. J. A. Otter, A. Natale, R. Batra, O. Tosas Auguet, E. Dyakova, S. D. Goldenberg, et al. Individual- and community-level risk factors for ESBL Enterobacteriaceae colonization identified by universal admission screening in London. *Clin Microbiol Infect*. 2019;25(10):1259-65.
2. Public Health England. English Surveillance Programme for Antimicrobial Utilisation and Resistance (ESPAUR) Report. 2019.
3. V. Gupta, G. Ye, M. Olesky, K. Lawrence, J. Murray, K. Yu. Trends in resistant Enterobacteriaceae and Acinetobacter species in hospitalized patients in the United States: 2013-2017. *BMC Infect Dis*. 2019;19(1):742.
4. A. Cassini, L. D. Hogberg, D. Plachouras, A. Quattrocchi, A. Hoxha, G. S. Simonsen, et al. Attributable deaths and disability-adjusted life-years caused by infections with antibiotic-resistant bacteria in the EU and the European Economic Area in 2015: a population-level modelling analysis. *Lancet Infect Dis*. 2019;19(1):56-66.
5. K. van Loon, A. F. Voor In 't Holt, M. C. Vos. A Systematic Review and Meta-analyses of the Clinical Epidemiology of Carbapenem-Resistant Enterobacteriaceae. *Antimicrob Agents Chemother*. 2018;62(1).
6. L. Tavošchi, S. Forni, A. Porretta, L. Righi, F. Pieralli, F. Menichetti, et al. Prolonged outbreak of New Delhi metallo-beta-lactamase-producing carbapenem-resistant Enterobacteriales (NDM-CRE), Tuscany, Italy, 2018 to 2019. *Euro Surveill*. 2020;25(6).
7. V. Decraene, H. T. T. Phan, R. George, D. H. Wyllie, O. Akinremi, Z. Aiken, et al. A Large, Refractory Nosocomial Outbreak of *Klebsiella pneumoniae* Carbapenemase-Producing *Escherichia coli* Demonstrates Carbapenemase Gene Outbreaks Involving Sink Sites Require Novel Approaches to Infection Control. *Antimicrob Agents Chemother*. 2018;62(12).
8. H. Suzuki, E. N. Perencevich, D. J. Livorsi, B. Alexander, B. F. Beck, K. K. Richardson, et al. Attributable mortality due to fluoroquinolone and extended-spectrum cephalosporin resistance in hospital-onset *Escherichia coli* and *Klebsiella* spp bacteremia: A matched cohort study in 129 Veterans Health Administration medical centers. *Infect Control Hosp Epidemiol*. 2019;40(8):928-31.
9. C. E. French, C. Coope, L. Conway, J. P. Higgins, J. McCulloch, G. Okoli, et al. Control of carbapenemase-producing Enterobacteriaceae outbreaks in acute settings: an evidence review. *J Hosp Infect*. 2017;95(1):3-45.
10. C. J. Donskey. The role of the intestinal tract as a reservoir and source for transmission of nosocomial pathogens. *Clin Infect Dis*. 2004;39(2):219-26.
11. J. Carlet. The gut is the epicentre of antibiotic resistance. *Antimicrob Resist Infect Control*. 2012;1(1):39.
12. M. Bohnhoff, C. P. Miller, W. R. Martin. Resistance of the Mouse's Intestinal Tract to Experimental *Salmonella* Infection. Factors Which Interfere with the Initiation of Infection by Oral Inoculation. *J Exp Med*. 1964;120:805-16.
13. E. van Nood, M. G. Dijkgraaf, J. J. Keller. Duodenal infusion of feces for recurrent *Clostridium difficile*. *N Engl J Med*. 2013;368(22):2145.
14. P. Moayyedi, Y. Yuan, H. Baharith, A. C. Ford. Faecal microbiota transplantation for *Clostridium difficile*-associated diarrhoea: a systematic review of randomised controlled trials. *Med J Aust*. 2017;207(4):166-72.

15. E. Tacconelli, F. Mazzaferri, A. M. de Smet, D. Bragantini, P. Eggimann, B. D. Huttner, et al. ESCMID-EUCIC clinical guidelines on decolonization of multidrug-resistant Gram-negative bacteria carriers. *Clin Microbiol Infect.* 2019;25(7):807-17.
16. S. Saha, R. Tariq, P. K. Tosh, D. S. Pardi, S. Khanna. Faecal microbiota transplantation for eradicating carriage of multidrug-resistant organisms: a systematic review. *Clin Microbiol Infect.* 2019;25(8):958-63.
17. J. P. Vink, J. A. Otter, J. D. Edgeworth. Carbapenemase-producing Enterobacteriaceae - once positive always positive? *Curr Opin Gastroenterol.* 2020;36(1):9-16.
18. B. D. Huttner, V. de Lastours, M. Wassenberg, N. Maharshak, A. Mauris, T. Galperine, et al. A 5-day course of oral antibiotics followed by faecal transplantation to eradicate carriage of multidrug-resistant Enterobacteriaceae: a randomized clinical trial. *Clin Microbiol Infect.* 2019;25(7):830-8.
19. E. Gough, H. Shaikh, A. R. Manges. Systematic review of intestinal microbiota transplantation (fecal bacteriotherapy) for recurrent *Clostridium difficile* infection. *Clin Infect Dis.* 2011;53(10):994-1002.
20. C. A. Woodhouse, V. C. Patel, S. Goldenberg, A. Sanchez-Fueyo, L. China, A. O'Brien, et al. PROFIT, a PROspective, randomised placebo controlled feasibility trial of Faecal microbiota Transplantation in cirrhosis: study protocol for a single-blinded trial. *BMJ Open.* 2019;9(2):e023518.
21. S. D. Goldenberg, R. Batra, I. Beales, J. L. Digby-Bell, P. M. Irving, L. Kellingray, et al. Comparison of Different Strategies for Providing Fecal Microbiota Transplantation to Treat Patients with Recurrent *Clostridium difficile* Infection in Two English Hospitals: A Review. *Infect Dis Ther.* 2018;7(1):71-86.
22. S. A. Julious. Two-sided confidence intervals for the single proportion: comparison of seven methods by Robert G. Newcombe, *Statistics in Medicine* 1998; 17:857-872. *Stat Med.* 2005;24(21):3383-4.
23. J. Sim, M. Lewis. The size of a pilot study for a clinical trial should be calculated in relation to considerations of precision and efficiency. *J Clin Epidemiol.* 2012;65(3):301-8.
24. M. H. Woodworth, M. K. Hayden, V. B. Young, J. H. Kwon. The Role of Fecal Microbiota Transplantation in Reducing Intestinal Colonization With Antibiotic-Resistant Organisms: The Current Landscape and Future Directions. *Open Forum Infect Dis.* 2019;6(7).
25. V. Tavoukjian. Faecal microbiota transplantation for the decolonization of antibiotic-resistant bacteria in the gut: a systematic review and meta-analysis. *J Hosp Infect.* 2019;102(2):174-88.
26. B. Davido, R. Batista, A. Dinh, P. de Truchis, E. M. Terveer, B. Roberts, et al. Fifty shades of graft: How to improve the efficacy of faecal microbiota transplantation for decolonization of antibiotic-resistant bacteria. *Int J Antimicrob Agents.* 2019;53(5):553-6.
27. A. Tucker, R. George, W. Welfare, P. Cleary, J. Cawthorne, A. Dodgson. Screening for carbapenemase-producing Enterobacteriaceae in previous carriers readmitted to hospital: evaluation of a change in screening policy. *J Hosp Infect.* 2019;103(2):156-9.
28. P. Moayyedi, M. G. Surette, P. T. Kim, J. Libertucci, M. Wolfe, C. Onischi, et al. Fecal Microbiota Transplantation Induces Remission in Patients With Active Ulcerative Colitis in a Randomized Controlled Trial. *Gastroenterology.* 2015;149(1):102-9 e6.
29. N. G. Rossen, S. Fuentes, M. J. van der Spek, J. G. Tijssen, J. H. Hartman, A. Duflou, et al. Findings From a Randomized Controlled Trial of Fecal Transplantation for Patients With Ulcerative Colitis. *Gastroenterology.* 2015;149(1):110-8 e4.



- 1  
2  
3 30. S. Paramsothy, M. A. Kamm, N. O. Kaakoush, A. J. Walsh, J. van den Bogaerde, D.  
4 Samuel, et al. Multidonor intensive faecal microbiota transplantation for active ulcerative  
5 colitis: a randomised placebo-controlled trial. *Lancet*. 2017;389(10075):1218-28.  
6  
7 31. S. P. Costello, O. Waters, R. V. Bryant, R. Katsikeros, J. Makanyanga, M. Schoeman, et  
8 al. Short Duration, Low Intensity, Pooled Fecal Microbiota Transplantation Induces  
9 Remission in Patients with Mild-Moderately Active Ulcerative Colitis: A Randomised  
10 Controlled Trial. *Gastroenterology*. 2017;152(5):S198-S9.  
11  
12  
13  
14  
15  
16  
17  
18  
19  
20  
21  
22  
23  
24  
25  
26  
27  
28  
29  
30  
31  
32  
33  
34  
35  
36  
37  
38  
39  
40  
41  
42  
43  
44  
45  
46  
47  
48  
49  
50  
51  
52  
53  
54  
55  
56  
57  
58  
59  
60

For peer review only

Figure 1: CONSORT flow diagram

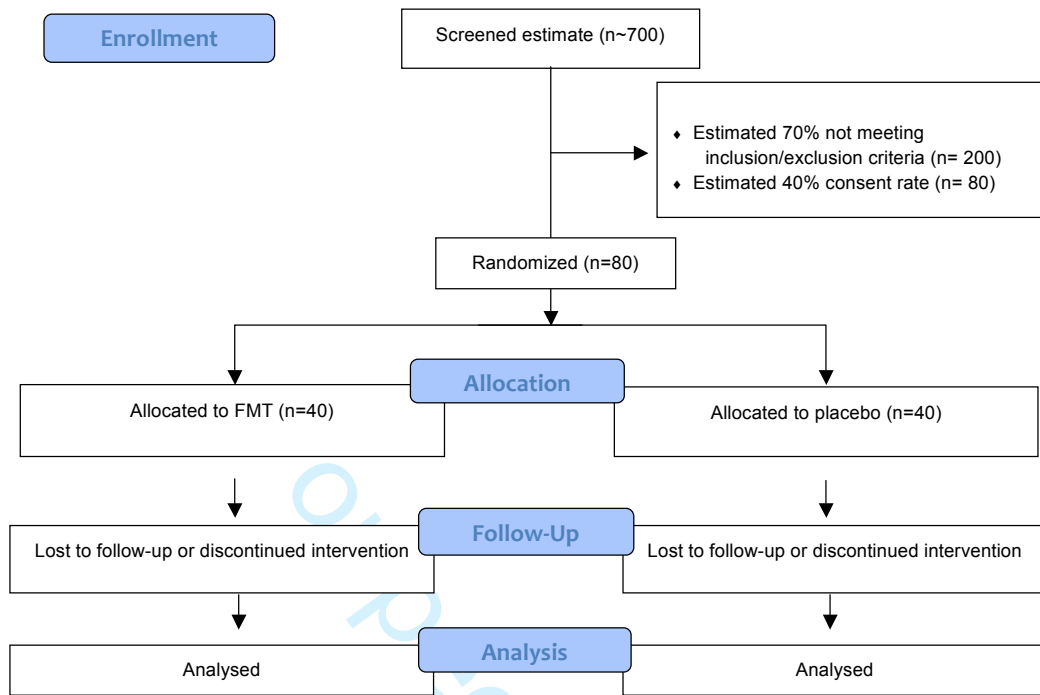

1  
2  
3  
4  
5  
6  
7  
8  
9  
10  
11  
12  
13  
14  
15  
16  
17  
18  
19  
20  
21  
22  
23  
24  
25  
26  
27  
28  
29  
30  
31  
32  
33  
34  
35  
36  
37  
38  
39  
40  
41  
42  
43  
44  
45  
46  
47  
48  
49  
50  
51  
52  
53  
54  
55  
56  
57  
58  
59  
60

**Figure 2: Intervention and follow-up**

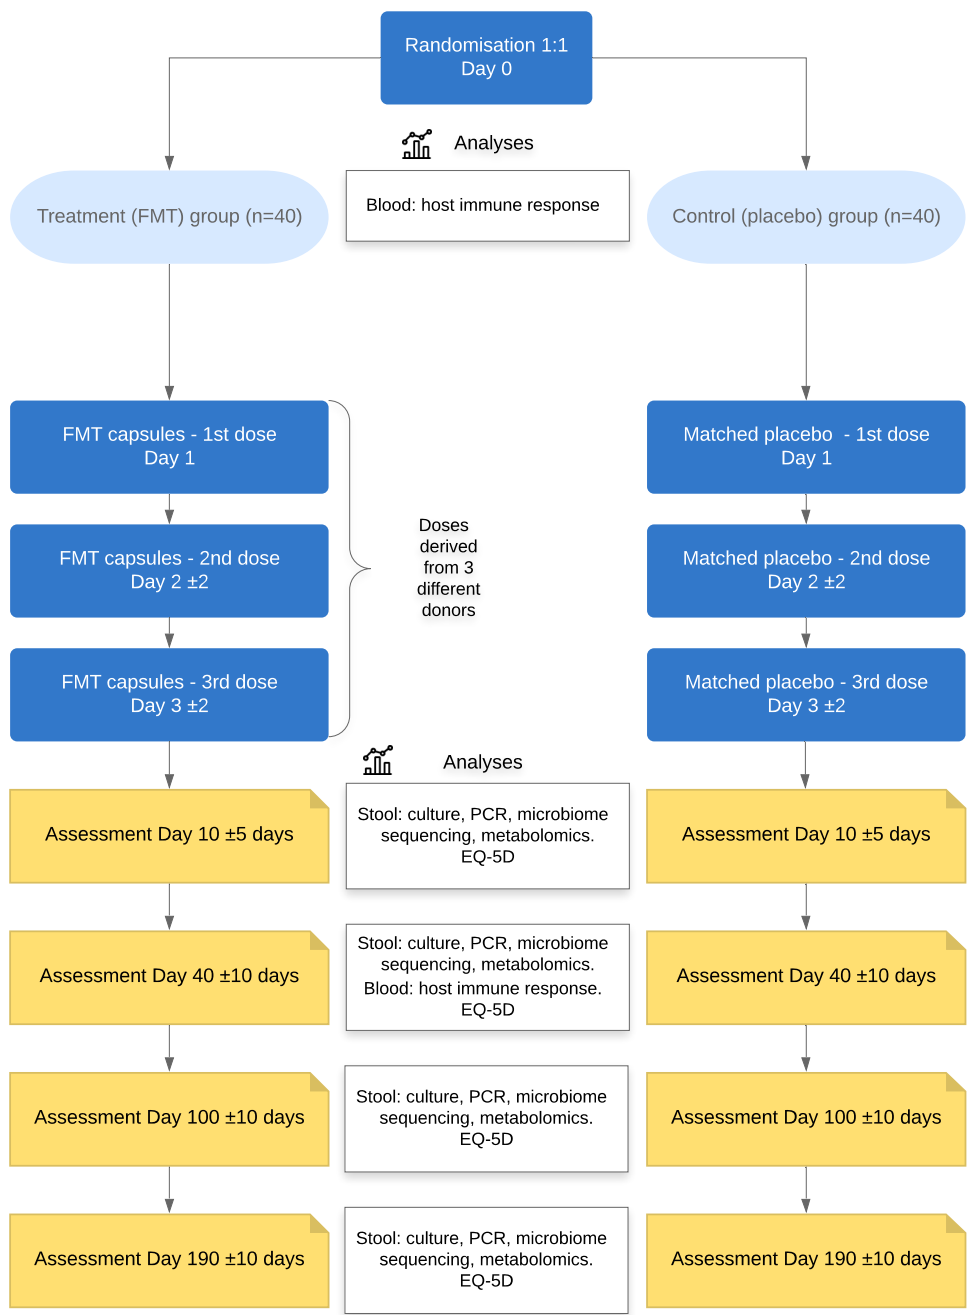

**Table 1:** Participant inclusion/ exclusion criteria**Inclusion criteria**

To be eligible for enrolment, a participant must meet all the following criteria before undergoing any study-related procedures:

- Adult patients (age 18 years or older at time of consent) **AND**
- Current/ previous patient at Guy's and St Thomas' NHS Foundation Trust **AND**
- Ability to understand the purpose, potential benefits and risks of the study and capable of giving informed consent. The participant must be able to provide written informed consent **AND**
- Documented gastrointestinal carriage of ESBL-E or CPE (stool sample) in the 21 days prior to consent **AND**
- Symptomatic infection with the same target organism of interest in preceding 6 months (this needs to be microbiologically confirmed but is not restricted to any particular body site e.g. could be urinary tract infection, intra-abdominal infection, blood stream infection etc).

**Exclusion criteria**

- Pregnancy or planned pregnancy
- Breastfeeding
- Severe or life-threatening food allergy
- Allergy or other contraindication to omeprazole, IMP or placebo ingredients
- Treatment with systemic antibiotic on the day of and day prior to 1<sup>st</sup> IMP/placebo dosing to the end of the dosing period
- Treatment with pre or probiotics in the 4 weeks prior to randomisation and for the duration of the study
- Severe immunodeficiency:
  - systemic chemotherapy <30 days from baseline or planned chemotherapy within the upcoming 6 months
  - Known HIV infection with CD4 count <250 cells/uL
  - Known neutropenia with absolute neutrophils <1.0x10<sup>9</sup>
  - Prolonged treatment with corticosteroids (equivalent to prednisone >60mg daily for > 30 days) within 8 weeks of randomisation
- Life expectancy <6 months
- Swallowing disorder, oral-motor dyscoordination or likely inability/unwillingness to ingest study medication
- Patients who have received another investigational drug or device within 4 months prior to randomisation
- Any condition or circumstance, in the opinion of the investigator, that would compromise the safety of the patient or the quality of the study data

**Supplementary file S1.**

FERARO: A prospective, randomised placebo-controlled feasibility trial of Faecal microbiota Transplant to ERadicate gastrointestinal carriage of Antibiotic Resistant Organisms: study protocol for single-blinded trial

Table 1. Criteria for progression to a substantive trial

| Criteria                                                                                                      | Stop – substantive trial not feasible | Continue with protocol modifications, close monitoring and clearly defined stop/go points | Continue without modification – feasible as is |
|---------------------------------------------------------------------------------------------------------------|---------------------------------------|-------------------------------------------------------------------------------------------|------------------------------------------------|
| <b>Hard Feasibility Criteria</b>                                                                              |                                       |                                                                                           |                                                |
| <b>Used to determine progression to a substantive trial</b>                                                   |                                       |                                                                                           |                                                |
| Consent rate (% of patients who fulfil eligibility criteria)                                                  | <15%                                  | 15-39%                                                                                    | >40%                                           |
| <b>Soft Feasibility Criteria</b>                                                                              |                                       |                                                                                           |                                                |
| <b>Taken into consideration in determining progression to a substantive trial</b>                             |                                       |                                                                                           |                                                |
| Proportion of patients fulfilling eligibility criteria                                                        | <10%                                  | 10-29%                                                                                    | >30%                                           |
| % of patients receiving IMP/placebo (as % of those consenting) and compliant will all doses on all three days | <50%                                  | 50-75%                                                                                    | >75%                                           |
| % of patients returning for follow up visit (Day 40)                                                          | <50%                                  | 50-79%                                                                                    | >80%                                           |
| % of patients providing follow up stool samples (Days 10, 40, 100 and 190)                                    | <50% returning two or more samples    | 50-79% patients returning two or more samples                                             | >80% patients returning two or more samples    |
| Ability to recruit sufficient healthy donors to manufacture all FMT                                           | Delay in dosing patients >2 weeks     | Delay in dosing patients up to 2 week2                                                    | No delay in patient dosing                     |
| <b>Soft Patient Tolerability Criteria</b>                                                                     |                                       |                                                                                           |                                                |
| <b>Taken into consideration in determining progression to a substantive trial</b>                             |                                       |                                                                                           |                                                |
| % of patients experiencing reflux                                                                             | >51%                                  | 21-50%                                                                                    | <20 %                                          |

|                                                    |      |        |       |
|----------------------------------------------------|------|--------|-------|
| following FMT administration                       |      |        |       |
| Intolerable (resulting in withdrawal) side effects | >51% | 21-50% | <20 % |

For peer review only

Table 2. Participant Information Sheet (PIS)

---

A prospective, randomised placebo controlled feasibility trial of **F**aecal microbiota Transplant to **E**radicate gastrointestinal carriage of **A**ntibiotic **R**esistant **O**rganisms

## The FERARO Trial

### Patient Information Sheet

---

**We would like to invite you to take part in the FERARO trial.**

- Before you decide whether you would like to take part in the trial, it's important for you to understand why the research is being done and what it would involve.
- Please take some time to read the information carefully, and discuss with your family, friends and doctor, as you wish.
- Ask us if anything is not clear, or you would like some more information

#### **Important things that you need to know:**

- Taking part is completely up to you and you can stop taking part at any time, without giving a reason. If you do not wish to take part, this will not affect the care you receive from your doctors or other health care professionals.
- You have been asked to take part in this study because a sample you have provided contains Antibiotic Resistant Bacteria (ARB). This study is testing the acceptability of a treatment that may be able to reduce the amount of ARB in the gut and the risk of infection.
- Faecal Microbiota Transplant (FMT) is a capsule made up of bacteria taken from a stool (poo) sample donated by healthy people. It could help to restore the balance of bacteria in the gut by reducing the amount of bacteria that are resistant to antibiotics.
- Faecal Microbiota Transplant (FMT) is a treatment used currently to treat patients with repeated *Clostridioides difficile* (C. diff) infection.
- The FERARO trial is looking to see if you consider this to be an acceptable treatment and if there are any side effects.

- You will be allocated to receive either FMT capsules or a placebo (dummy) capsules. You will not know which treatment you receive.
- You will be asked to take five capsules a day for three days in a row. This may be while you are already staying in hospital or as an outpatient.
- You will be asked to provide stool samples before and after receiving treatment to see if there are any changes in the bacteria present in your gut.
- You will be followed up by the study team for six months after completing the treatment.

**If you have any questions about this study, please contact:**

Dr Simon Goldenberg  
Telephone (with message facility): 020 7188 8515  
Email: [simon.goldenberg@gstt.nhs.uk](mailto:simon.goldenberg@gstt.nhs.uk)

**What is the purpose of the study?**

The human gut has trillions of good bacteria (germs or bugs) which are important to keep us healthy. In total these bugs are called the microbiota. The bugs are always evolving to beat antibiotics used to fight them and this is known as resistance. Resistance to antibiotics allows bugs to survive and spread.

Antibiotic resistant bacteria (ARB) usually live in the gut (or in the surrounding environment), where they do no harm. This is called colonisation. However, the ARB can appear and cause infection in other parts of the body that normally lack any bacteria, for example in the bladder or blood. When this happens, treatment with a more powerful type of antibiotic is usually needed. This is more likely to happen in people who are more prone to infection, including people with an underlying disease or injury, or people who are already admitted to hospital.

Antibiotic resistance is a growing and serious threat to worldwide health, and means that doctors may be limited in the types of treatments that they can offer to patients. Without effective antibiotics even simple infections could become deadly, making routine medical procedures too dangerous to perform. There is an urgent need to find new antibiotics, but this takes time and is very expensive.

Two particular groups of antibiotic resistant bacteria are known as CRE and ESBL (Carbapenem Resistant Enterobacteriales and Extended Spectrum Beta-lactamase producing bacteria).

Carbapenems and beta-lactams are some of the most powerful types of antibiotics. Some strains of bacteria make enzymes (chemicals), which allow them to destroy carbapenem and beta-lactam antibiotics which makes the bacteria resistant to the antibiotics.



1  
2  
3 There is growing interest in non-antibiotic treatments like Faecal Microbiota Transplant (FMT) to  
4 deal with this problem.  
5

6 FMT is the transfer of bacteria from the guts of healthy donors (taken from their poo / stools) into  
7 the gut of a patient. The aim is to restore a healthy balance of bacteria (reducing harmful ones and  
8 increasing good ones). It is currently used to treat patients with repeated *Clostridioides difficile*  
9 infection. This is an infection causing severe diarrhoea and stomach pain, normally after having  
10 antibiotics which have harmed the microbiota.  
11  
12

13 FMT is very effective and safe in treating this group of patients, with success rates of over 80%.  
14 Initial research shows that it may be helpful in other conditions.  
15  
16

### 17 Why have I been invited to take part? 18

19 You have been identified by a member of your healthcare team as a carrier of ARB. You have had  
20 an infection caused by ARB in the last 6 months. This might be a urine, bloodstream, chest or other  
21 type of infection and may have been on a previous visit to the hospital or from a sample that your  
22 General Practitioner sent to our lab.  
23  
24  
25

### 26 Do I have to take part? 27

28 No, participation in the study is entirely voluntary. It is up to you whether or not you wish to take  
29 part. You will be given time to read the patient information sheet and ask any questions you wish  
30 about the study.  
31  
32

33 If you decide to take part you will be given this information sheet to keep and asked to sign a  
34 consent form. If you decide to take part you are still free to withdraw at any time and without giving  
35 a reason.  
36  
37  
38

### 39 What will happen if I take part? 40

41 You will be asked to provide a stool sample to first check for the presence of the ESBL or CRE  
42 bacteria. If we don't find the bacteria you will not be able to continue in the study and any samples  
43 that you have already provided will be destroyed.  
44  
45

46 If ESBL or CRE bacteria are detected, you will be asked to provide a blood sample and female  
47 participants may be asked to provide a urine sample for a pregnancy test. Once we can confirm that  
48 it is safe for you to enter the study, you will be placed in one of two groups. This will be decided by  
49 chance. One group will receive FMT treatment, and the other will receive placebo (dummy)  
50 capsules. Both groups will be given five identical capsules to take each day for three days in a row.  
51 You will not know which group you are in until the end of the study.  
52  
53

54 Before taking the trial treatment, you will be asked to fast for 4 hours. You cannot eat any food  
55 during this time but you can drink water. You will also be asked to take a commonly prescribed  
56 medication called omeprazole. This works to reduce the amount of acid in the stomach. It will help  
57 protect the good bacteria in the capsules from being damaged.  
58  
59  
60

You will then take all 5 capsules with water or squash. A member of the study team will stay with you for a short time while you take the capsules and check for any side effects. You can eat and drink as normal shortly after taking the capsules. The capsules will only be given on weekdays. If you are already staying in hospital, you will receive the treatment during your stay. If you are allowed to go home during this time, we will ask you to return to the hospital to complete the treatment. If you are not currently admitted to hospital, you will be asked to visit the hospital as an outpatient to complete the treatment.

You will be contacted by the study team by telephone after completing the treatment. This will happen 1 week, 3 months and 6 months after receiving treatment. You will be asked to provide a stool sample using the collection kit provided, and send it back to us in the post (postage will be pre-paid). You will be asked to complete a quality of life questionnaire over the phone. We will ask you how you have been feeling and if you are taking any new medications.

We also ask that you return to St Thomas' Hospital for a visit about 1 month after taking the capsules and we will ask you to bring a stool sample at that visit. We are able to reimburse you for the travel costs of visits to the hospital needed for the study, up to a maximum of £20 per visit.

In total you will be asked to provide five stool samples.

|                                   | Assessment                      | Treatment Day 1                 | Treatment Day 2                 | Treatment Day 3                 | Follow Up 1 week, 3 months, 6 months | Follow Up 1 month |
|-----------------------------------|---------------------------------|---------------------------------|---------------------------------|---------------------------------|--------------------------------------|-------------------|
|                                   | During Hospital Stay or Visit 1 | During Hospital Stay or Visit 2 | During Hospital Stay or Visit 3 | During Hospital Stay or Visit 4 | Telephone Call                       | Hospital Visit    |
| Consent form                      | X                               |                                 |                                 |                                 |                                      |                   |
| Blood sample                      | X                               |                                 |                                 |                                 |                                      | X                 |
| Stool sample                      | X                               |                                 |                                 |                                 | X                                    | X                 |
| Pregnancy test (females)          | X                               |                                 |                                 |                                 |                                      |                   |
| Eligibility Check                 | X                               |                                 |                                 |                                 |                                      |                   |
| Basic health check                | X                               | X                               | X                               | X                               |                                      |                   |
| Quality of Life Questionnaire     | X                               |                                 |                                 |                                 | X                                    | X                 |
| Fasting for 4 hours               |                                 | X                               | X                               | X                               |                                      |                   |
| Capsule administration            |                                 | X                               | X                               | X                               |                                      |                   |
| Side effects and medication check |                                 | X                               | X                               | X                               | X                                    | X                 |

1  
2  
3 With your consent we will send a letter to your GP to let them know that you are taking part in  
4 the trial.

### 6 **What will happen to any samples I provide?**

7  
8 Stool samples will be processed in the FMT laboratory at St Thomas's Hospital and divided up  
9 into smaller samples. Some of the sample will be analysed at St Thomas' Hospital and some will  
10 be sent to KCL for analysis. They will be labelled with a study ID number that links the samples to  
11 who you are. This link will be kept securely by the study team and will not be shared with  
12 anybody else. No directly identifiable information will be used to label your samples.

13  
14  
15 You will be asked to provide 14 ml of blood (equivalent to 3 teaspoons) before entering the  
16 study. This is to check that it is safe for you to enter the study. If any of these tests have already  
17 been done as part of your normal care in the previous 5 days, we will not need to repeat them.

### 20 **Will my samples be used in future research?**

21  
22 We will ask for your consent to take a blood sample and to use the stool samples that you have  
23 already provided for use in future research in addition to the samples mentioned above. The  
24 consent for storage of samples for future research is optional and will not affect your participation  
25 in the study in any way. If you do consent to this, we will ask you for 40 ml (8 teaspoons) before  
26 receiving the study treatment. This will be taken at the same time as the initial blood sample, so  
27 doesn't require an extra needle. We will also ask for a further 40 ml (8 teaspoons) at the face to  
28 face visit about 1 month after taking the capsules.

### 33 **What are the possible benefits and disadvantages of taking part?**

34  
35 This study is designed to look at the safety and tolerability of FMT treatment to see if a larger study  
36 would show an improvement in wellbeing for patients with ARB infections. There are few  
37 treatments available to patients with antimicrobial resistant infections.

38  
39 We hope that the knowledge we would gain from this study will improve our understanding of the  
40 way in which FMT works, and the role of the treatment in antimicrobial resistance. FMT appears to  
41 be safe in the considerable numbers of patients who have received it for other reasons.

42  
43 If you are in the group that receives FMT, it is possible that it will help to reduce the ARB in found  
44 in your gut and reduce the risk of further infections. However, we will not know this until we have  
45 completed this study and future studies. You may not directly benefit from taking part in this study,  
46 but the information gained may help to improve the treatment of people with your condition in the  
47 future.

48  
49 If you decide to take part in the study, you may be asked to attend the hospital more frequently  
50 than you would if you choose not to take part. You will also receive more regular input from a study  
51 doctor and nurse to monitor how you are feeling after the treatment.

### 58 **What is the drug that is being tested?**

1  
2  
3 FMT is the transfer of bacteria from the guts of healthy donors (taken from their poo) into the gut  
4 of a patient. FMT is produced by carefully selecting healthy individuals who have undergone an  
5 extensive health assessment and have been tested for a wide range of infections and other  
6 diseases. We follow National guidelines when selecting volunteer donors. The donor poo sample is  
7 processed in the laboratory to concentrate the healthy bacteria and remove most of the water  
8 (freeze drying) which leaves a small amount of powder. The powder is then packed into capsules  
9 which need to be swallowed.  
10

11  
12 FMT is currently used to treat patients with repeated *Clostridioides difficile* infection. In these  
13 patients, FMT is administered via a tube into the stomach or the lower bowel.  
14

15  
16 FMT is very effective and safe in treating this group of patients, with success rates of over 80%.  
17

18  
19 Some patients have experienced side effects, including belching, abdominal cramps and abdominal  
20 pain. Diarrhoea and constipation has also been reported.  
21

22  
23 We hope that producing FMT in capsules will help to minimise any side effects. We will monitor you  
24 closely while you are taking FMT and ask how you are feeling after receiving the treatment.  
25

26  
27 We would like you to report any unexpected symptoms or health events to the study team, even  
28 if you think it is not related to the treatment.  
29

30  
31 Omeprazole

32  
33 Omeprazole reduces the amount of acid your stomach makes. It's a widely used treatment for  
34 indigestion, heartburn and acid reflux.  
35

36  
37 Most people who take omeprazole don't have any side effects, particularly if it is taken over a short  
38 period of time, as is the case here. If you do get a side effect, it's usually mild (such as abdominal  
39 pain, constipation, diarrhoea, dizziness and dry mouth) and will go away when you stop taking  
40 omeprazole.  
41

#### 42 **How is FMT made?**

43  
44 After the healthy volunteers have been carefully screened and tested, the stool sample is brought  
45 to the FMT laboratory. Sterile salt water will be added to the stool and it will be filtered to remove  
46 any solid material and then be freeze-dried to remove water.  
47

48  
49 The resultant material is placed into capsules and stored frozen until it is required by the person  
50 who will receive it. Once a patient has been identified and consented to take part in the FERARO  
51 study, the capsules will be administered to the patient.  
52

53  
54 We will store a small amount of the stool sample to assess the types of bacteria present  
55 (microbiota analysis) so that we can compare to the stool samples provided by the patients that  
56 take the FMT.  
57  
58  
59  
60

1  
2  
3 These analyses will be performed at King's College, London for the blood samples. As part of a  
4 separate study the stool sample analysis will be performed at the National Institute for Biological  
5 Standards and Controls.

6  
7 All samples will be completely anonymised. Patients who receive the FMT will not be given any  
8 information about who donated the samples.  
9

10  
11 Stool will be archived for thirty years for traceability, so that in the unlikely event of an infection  
12 occurring in the recipient the donor stool can be checked for infection also. The data will be  
13 anonymised and will only be accessible to members of the trials team. After this period it will be  
14 destroyed.  
15

### 16 17 18 **Who is organising and funding this study?**

19  
20 The doctor in charge of this study is Dr Simon Goldenberg. The study is funded by the National  
21 Institute of Health Research and is being sponsored by Guy's and St Thomas' NHS Foundation  
22 Trust.  
23

### 24 25 26 **Who has reviewed the study?**

27  
28 All research in the NHS is looked at by an independent group of people, called a Research Ethics  
29 Committee, to protect your interests. This study has been reviewed and approved by the London –  
30 City and East Research Ethics committee (reference 20/LO/0117.) It has also been reviewed by an  
31 independent review group and approved by the Health Research authority and the Medicines and  
32 Healthcare products Regulatory Agency.  
33  
34

### 35 36 37 **What if something goes wrong?**

38  
39 If you have a concern about any aspect of this study, you should ask to speak to your study doctor  
40 who will do their best to answer your questions (contact details on page 2 of this information  
41 sheet).  
42

43  
44 If you remain unhappy and wish to complain formally, you can do this through the NHS  
45 Complaints procedure by contacting the Patient Advice Liaison Service (PALS) office.  
46

47  
48 Guy's and St Thomas' NHS Foundation Trust PALS  
49 Contact number: 0207 188 8801 or pals@gstt.nhs.uk  
50

51  
52 Every care will be taken in the course of this study. However in the unlikely event that you are  
53 injured by taking part, compensation may be available.  
54

55  
56 In the event that something does go wrong and you are harmed during the research and this is  
57 due to someone's negligence then you may have grounds for a legal action for compensation  
58 against Guy's and St. Thomas' NHS Foundation Trust, but you may have to pay your legal costs.  
59  
60

## How will we use information about you?

We will need to use information from you and from your medical records for this research project. This information will include your hospital number, name, date of birth, address and contact details. People will use this information to do the research or to check your records to make sure that the research is being done properly.

People who do not need to know who you are will not be able to see your name or contact details. Your data will have a code number instead. We will keep all information about you safe and secure.

Once we have finished the study, we will keep some of the data so we can check the results. We will write our reports in a way that no-one can work out that you took part in the study.

## What are your choices about how your information is used?

You can stop being part of the study at any time, without giving a reason, but we will keep information about you that we already have.

If you agree to take part in this study, you will have the option to take part in future research using your data saved from this study.

## Where can you find out more about how your information is used?

You can find out more about how we use your information at:

[www.guysandstthomas.nhs.uk/research/patients/use-of-data.aspx](http://www.guysandstthomas.nhs.uk/research/patients/use-of-data.aspx)

at [www.hra.nhs.uk/information-about-patients/](http://www.hra.nhs.uk/information-about-patients/)

by asking one of the research team or by sending an email to the Chief Investigator

[simon.goldenberg@gstt.nhs.uk](mailto:simon.goldenberg@gstt.nhs.uk)

## What will happen to the results of the research study?

Once the data has been analysed we plan to publish the results in an international journal so that the information can benefit as many people as possible. We can provide you with a brief summary of the results of the study when available should you desire this. If you would like to be kept informed about the results of the study, please email the Chief Investigator using the details below.

## Contact details:

Thank you for taking the time to read this information. If there is any other information you would like, please do not hesitate to contact the study team on the numbers below.

|                     |                     |                                    |
|---------------------|---------------------|------------------------------------|
| Study co-ordinator: | Dr Blair Merrick    | Tel: 0207 188 7188 extension 53339 |
| Research Nurse:     | Karen Bisnauthsing  | Tel: 0207 188 7188 extension 53339 |
| Chief Investigator: | Dr Simon Goldenberg | Tel: 0207 188 8515                 |

Table 3. Healthy donor inclusion and exclusion criteria

|                                                                                                                                                                                                                                                                                                                                                                                                                                                                                                                                                                                                                                                                                                                                                                                                                                                                                                                                                                                                                                                                                                                                                                                                                                                         |
|---------------------------------------------------------------------------------------------------------------------------------------------------------------------------------------------------------------------------------------------------------------------------------------------------------------------------------------------------------------------------------------------------------------------------------------------------------------------------------------------------------------------------------------------------------------------------------------------------------------------------------------------------------------------------------------------------------------------------------------------------------------------------------------------------------------------------------------------------------------------------------------------------------------------------------------------------------------------------------------------------------------------------------------------------------------------------------------------------------------------------------------------------------------------------------------------------------------------------------------------------------|
| <p><b>Inclusion criteria</b></p> <ul style="list-style-type: none"> <li>• 18-60 years of age <b>AND</b></li> <li>• BMI 18-30</li> </ul>                                                                                                                                                                                                                                                                                                                                                                                                                                                                                                                                                                                                                                                                                                                                                                                                                                                                                                                                                                                                                                                                                                                 |
| <p><b>Exclusion criteria</b></p> <ul style="list-style-type: none"> <li>• Received antimicrobials within past 3 months</li> <li>• Known prior exposure to HIV and/or viral hepatitis</li> <li>• Known previous or latent tuberculosis</li> <li>• Risk factors for blood borne viruses within the previous 6 months</li> <li>• Received live attenuated vaccine within past 6 months</li> <li>• Underlying gastrointestinal condition/ or unexplained symptoms including acute diarrhoea in 2 weeks prior to donating</li> <li>• Family history of any significant gastrointestinal condition</li> <li>• History of atopy, systemic autoimmune condition, diabetes, neurological or psychiatric condition or known risk of prion disease. History of chronic pain syndrome including chronic fatigue and fibromyalgia, or malignancy.</li> <li>• Taking any regular medications</li> <li>• History of taking proton pump inhibitors or immunosuppressive medications within the past 3 months</li> <li>• Ever received growth hormone, insulin from cows or clotting factor concentrates</li> <li>• Received an experimental medicine or vaccine within the past 6 months</li> <li>• Travelled to a tropical country within the past 6 months</li> </ul> |

Table 4. Donor screening and eligibility questionnaire

**Faecal Microbiota Transplant (FMT) –Donor programme**

|                                           |                                                                                                                                                                                                                                                                                                                                                                                                                                                                                                                                                                                                                                                                                                                                                                                                                                                                                                          |
|-------------------------------------------|----------------------------------------------------------------------------------------------------------------------------------------------------------------------------------------------------------------------------------------------------------------------------------------------------------------------------------------------------------------------------------------------------------------------------------------------------------------------------------------------------------------------------------------------------------------------------------------------------------------------------------------------------------------------------------------------------------------------------------------------------------------------------------------------------------------------------------------------------------------------------------------------------------|
| Donor name                                |                                                                                                                                                                                                                                                                                                                                                                                                                                                                                                                                                                                                                                                                                                                                                                                                                                                                                                          |
| Donor date of birth                       |                                                                                                                                                                                                                                                                                                                                                                                                                                                                                                                                                                                                                                                                                                                                                                                                                                                                                                          |
| Donor Hospital number                     |                                                                                                                                                                                                                                                                                                                                                                                                                                                                                                                                                                                                                                                                                                                                                                                                                                                                                                          |
| Donor number                              |                                                                                                                                                                                                                                                                                                                                                                                                                                                                                                                                                                                                                                                                                                                                                                                                                                                                                                          |
| Donor contact details – telephone / email |                                                                                                                                                                                                                                                                                                                                                                                                                                                                                                                                                                                                                                                                                                                                                                                                                                                                                                          |
| Name of assessor                          |                                                                                                                                                                                                                                                                                                                                                                                                                                                                                                                                                                                                                                                                                                                                                                                                                                                                                                          |
| Position                                  |                                                                                                                                                                                                                                                                                                                                                                                                                                                                                                                                                                                                                                                                                                                                                                                                                                                                                                          |
| Date of assessment                        |                                                                                                                                                                                                                                                                                                                                                                                                                                                                                                                                                                                                                                                                                                                                                                                                                                                                                                          |
| Age                                       | Exclude if <18 or >60                                                                                                                                                                                                                                                                                                                                                                                                                                                                                                                                                                                                                                                                                                                                                                                                                                                                                    |
| Gender                                    | <input type="checkbox"/> Male <input type="checkbox"/> Female                                                                                                                                                                                                                                                                                                                                                                                                                                                                                                                                                                                                                                                                                                                                                                                                                                            |
| Ethnicity                                 | <input type="checkbox"/> White - White British<br><input type="checkbox"/> White - White Irish<br><input type="checkbox"/> White - Other<br><input type="checkbox"/> Mixed race – White and Black Caribbean<br><input type="checkbox"/> Mixed race – White and Black African<br><input type="checkbox"/> Mixed race – White and Asian<br><input type="checkbox"/> Mixed race – Other<br><input type="checkbox"/> Asian or Asian British – Indian<br><input type="checkbox"/> Asian or Asian British – Bangladeshi<br><input type="checkbox"/> Asian or Asian British – Pakistani<br><input type="checkbox"/> Asian or Asian British – Other<br><input type="checkbox"/> Black or Black British – Caribbean<br><input type="checkbox"/> Black or Black British – African<br><input type="checkbox"/> Black or Black British – Other<br><input type="checkbox"/> Chinese<br><input type="checkbox"/> Other |
| Height                                    | cm                                                                                                                                                                                                                                                                                                                                                                                                                                                                                                                                                                                                                                                                                                                                                                                                                                                                                                       |
| Weight                                    |                                                                                                                                                                                                                                                                                                                                                                                                                                                                                                                                                                                                                                                                                                                                                                                                                                                                                                          |



|                                                                        |                                                                                                                                                                                                                                                                                                                                                                                                                                                                           |
|------------------------------------------------------------------------|---------------------------------------------------------------------------------------------------------------------------------------------------------------------------------------------------------------------------------------------------------------------------------------------------------------------------------------------------------------------------------------------------------------------------------------------------------------------------|
|                                                                        | kg                                                                                                                                                                                                                                                                                                                                                                                                                                                                        |
| BMI                                                                    |                                                                                                                                                                                                                                                                                                                                                                                                                                                                           |
|                                                                        | Exclude if BMI $\leq 18$ or $\geq 30$                                                                                                                                                                                                                                                                                                                                                                                                                                     |
| Has your weight changed by more than 5lb / 2kg in the past 6 months?   | <input type="checkbox"/> Yes <input type="checkbox"/> No                                                                                                                                                                                                                                                                                                                                                                                                                  |
|                                                                        | Detail:                                                                                                                                                                                                                                                                                                                                                                                                                                                                   |
| Describe your diet (as many as apply):                                 | <input type="checkbox"/> Omnivore<br><input type="checkbox"/> Vegetarian<br><input type="checkbox"/> Vegan<br><input type="checkbox"/> Kosher<br><input type="checkbox"/> Halal<br><input type="checkbox"/> Raw food only<br><input type="checkbox"/> Pescatarian<br><input type="checkbox"/> No red meat<br><input type="checkbox"/> Low carbohydrate<br><input type="checkbox"/> Lactose free<br><input type="checkbox"/> Gluten free<br><input type="checkbox"/> Other |
| How many portions of fruit and vegetables do you consume per day?      | <input type="checkbox"/> one or less<br><input type="checkbox"/> two to three<br><input type="checkbox"/> three to four<br><input type="checkbox"/> five to six<br><input type="checkbox"/> seven or more                                                                                                                                                                                                                                                                 |
| How many servings of cow, sheep or goat's milk do you consume per day? | <input type="checkbox"/> one or less<br><input type="checkbox"/> two to three<br><input type="checkbox"/> three to four<br><input type="checkbox"/> five to six<br><input type="checkbox"/> seven or more                                                                                                                                                                                                                                                                 |
| Alcohol – units/week                                                   |                                                                                                                                                                                                                                                                                                                                                                                                                                                                           |
| Smoking/day                                                            |                                                                                                                                                                                                                                                                                                                                                                                                                                                                           |
| Do you take any illicit drugs?                                         | <input type="checkbox"/> Yes <input type="checkbox"/> No                                                                                                                                                                                                                                                                                                                                                                                                                  |
|                                                                        | Exclude if YES                                                                                                                                                                                                                                                                                                                                                                                                                                                            |
| Normal bowel habit – average Bristol Stool Consistency                 | <input type="checkbox"/> 1<br><input type="checkbox"/> 2<br><input type="checkbox"/> 3<br><input type="checkbox"/> 4<br><input type="checkbox"/> 5<br><input type="checkbox"/> 6<br><input type="checkbox"/> 7                                                                                                                                                                                                                                                            |
|                                                                        | Exclude if 1, 6 or 7                                                                                                                                                                                                                                                                                                                                                                                                                                                      |

|                                                 |                                                                                                                                                                                         |                                                                                                                                                                                                                                                      |
|-------------------------------------------------|-----------------------------------------------------------------------------------------------------------------------------------------------------------------------------------------|------------------------------------------------------------------------------------------------------------------------------------------------------------------------------------------------------------------------------------------------------|
| 1<br>2<br>3<br>4<br>5<br>6<br>7<br>8<br>9<br>10 | Normal bowel habit – average frequency                                                                                                                                                  | <input type="checkbox"/> >2/day<br><input type="checkbox"/> once to twice daily<br><input type="checkbox"/> once / 2 days<br><input type="checkbox"/> <once / 2 days<br><br>Exclude if active diarrhoea (>3 UBM/day for at least 2 consecutive days) |
| 11<br>12<br>13<br>14<br>15                      | Have you ever been rejected as a blood donor/told not to donate? If yes, why?                                                                                                           | <input type="checkbox"/> Yes <input type="checkbox"/> No<br><br>Exclude if YES                                                                                                                                                                       |
| 16<br>17                                        | What is your country of birth?                                                                                                                                                          |                                                                                                                                                                                                                                                      |
| 18<br>19<br>20<br>21<br>22                      | Have you ever resided in another country (other than UK) for >5 years? If so which countries and when?                                                                                  | <input type="checkbox"/> Yes <input type="checkbox"/> No                                                                                                                                                                                             |
| 23<br>24<br>25<br>26<br>27<br>28<br>29<br>30    | Do you currently have a profession that is associated with an increased risk of blood-borne transmissible diseases (e.g. daily contact with patients/inmates)? If yes, what profession? | <input type="checkbox"/> Yes <input type="checkbox"/> No<br><br>Exclude if health/social care worker with <u>direct</u> patient contact                                                                                                              |
| 31<br>32<br>33<br>34<br>35<br>36<br>37<br>38    | Have you ever had a needle-stick or injury from a blood contaminated object from someone else? If yes, when and how was this follow up?                                                 | <input type="checkbox"/> Yes <input type="checkbox"/> No                                                                                                                                                                                             |
| 39<br>40<br>41<br>42<br>43<br>44<br>45<br>46    | Have you ever injected yourself or been injected with illegal or non-prescribed drugs including body building drugs or cosmetics (even if this was only once or a long time ago?)       | <input type="checkbox"/> Yes <input type="checkbox"/> No<br><br>Exclude if YES                                                                                                                                                                       |
| 47<br>48<br>49<br>50                            | Have you ever had a tattoo? If yes, when and in which country was it performed?                                                                                                         | <input type="checkbox"/> Yes <input type="checkbox"/> No<br><br>Exclude if within past 6 months                                                                                                                                                      |
| 51<br>52<br>53<br>54                            | Have you ever had a piercing? If yes, when and in which country was it performed?                                                                                                       | <input type="checkbox"/> Yes <input type="checkbox"/> No<br><br>Exclude if within past 6 months                                                                                                                                                      |
| 55<br>56<br>57<br>58                            | Have you ever had acupuncture? If yes, when and in which country was it performed?                                                                                                      | <input type="checkbox"/> Yes <input type="checkbox"/> No<br><br>Exclude if within past 4 months                                                                                                                                                      |
| 59<br>60                                        | Have you ever had an operation or undergone clinical treatment in                                                                                                                       | <input type="checkbox"/> Yes <input type="checkbox"/> No                                                                                                                                                                                             |

|                                        |                                                                                                                                                                            |                                                                                                                                                                                                                                              |
|----------------------------------------|----------------------------------------------------------------------------------------------------------------------------------------------------------------------------|----------------------------------------------------------------------------------------------------------------------------------------------------------------------------------------------------------------------------------------------|
| 1<br>2<br>3<br>4<br>5<br>6<br>7        | a hospital with poor hygienic conditions?<br>If yes, when and in which country was it performed?                                                                           |                                                                                                                                                                                                                                              |
| 8<br>9<br>10<br>11<br>12<br>13         | Have you ever had a rare infectious disease (e.g. tuberculosis, malaria, trypanosomiasis)?<br>If yes, when and which disease?                                              | <input type="checkbox"/> Yes <input type="checkbox"/> No                                                                                                                                                                                     |
| 14<br>15<br>16<br>17                   | Have you ever been vaccinated against Hepatitis A or B?<br>If yes, which?                                                                                                  | <input type="checkbox"/> Yes <input type="checkbox"/> No                                                                                                                                                                                     |
| 18<br>19<br>20                         | In the last 12 months have you had sex with anyone who is HIV positive?                                                                                                    | <input type="checkbox"/> Yes <input type="checkbox"/> No<br>Exclude if Yes                                                                                                                                                                   |
| 21<br>22<br>23<br>24                   | In the last 12 months have you had sex with anyone with hepatitis B, hepatitis C or HTLV?                                                                                  | <input type="checkbox"/> Yes <input type="checkbox"/> No<br>Exclude if Yes                                                                                                                                                                   |
| 25<br>26<br>27<br>28<br>29             | In the last 12 months have you had sex with anyone who has ever been given money or drugs for sex?                                                                         | <input type="checkbox"/> Yes <input type="checkbox"/> No<br>Exclude if Yes                                                                                                                                                                   |
| 30<br>31<br>32<br>33                   | In the last 12 months have you had sex with anyone who has ever injected drugs?                                                                                            | <input type="checkbox"/> Yes <input type="checkbox"/> No<br>Exclude if Yes                                                                                                                                                                   |
| 34<br>35<br>36<br>37<br>38<br>39<br>40 | In the last 12 months have you had sex with anyone who may ever have had sex in parts of the world where HIV/AIDS is very common (this includes most countries in Africa)? | <input type="checkbox"/> Yes <input type="checkbox"/> No<br>Exclude if Yes                                                                                                                                                                   |
| 41<br>42<br>43<br>44<br>45             | <b>Male donors ONLY:</b><br>In the last 12 months have you ever had oral or anal sex with a man, with or without a condom?                                                 | <input type="checkbox"/> Yes <input type="checkbox"/> No<br>Exclude if Yes                                                                                                                                                                   |
| 46<br>47<br>48<br>49<br>50<br>51       | <b>Female donors ONLY:</b><br>In the last 12 months have you had sex with a man who has ever had oral or anal sex with another man, with or without a condom?              | <input type="checkbox"/> Yes <input type="checkbox"/> No<br>Exclude if Yes                                                                                                                                                                   |
| 52<br>53<br>54<br>55                   | Have you ever been treated for an intestinal infection?<br>If yes, which one and when?                                                                                     | <input type="checkbox"/> Yes <input type="checkbox"/> No                                                                                                                                                                                     |
| 56<br>57<br>58<br>59<br>60             | Do you have any gastro-intestinal conditions:<br>Barretts Oesophagus<br>Coeliac disease<br>Diverticular disease                                                            | <input type="checkbox"/> Yes <input type="checkbox"/> No<br><input type="checkbox"/> Yes <input type="checkbox"/> No<br><input type="checkbox"/> Yes <input type="checkbox"/> No<br><input type="checkbox"/> Yes <input type="checkbox"/> No |

|                                                                                                             |                                                                                                                                                                                                                                                                                                                                                                             |                                                                                                                                                                                                                                                                                                                                                                                                                                                                                                                                                                                                                                                                                                                                                                                                                                                                                                                                                                                                                                  |
|-------------------------------------------------------------------------------------------------------------|-----------------------------------------------------------------------------------------------------------------------------------------------------------------------------------------------------------------------------------------------------------------------------------------------------------------------------------------------------------------------------|----------------------------------------------------------------------------------------------------------------------------------------------------------------------------------------------------------------------------------------------------------------------------------------------------------------------------------------------------------------------------------------------------------------------------------------------------------------------------------------------------------------------------------------------------------------------------------------------------------------------------------------------------------------------------------------------------------------------------------------------------------------------------------------------------------------------------------------------------------------------------------------------------------------------------------------------------------------------------------------------------------------------------------|
| 1<br>2<br>3<br>4<br>5<br>6<br>7<br>8<br>9<br>10<br>11<br>12<br>13<br>14<br>15<br>16<br>17<br>18<br>19<br>20 | <p>Bariatric surgery</p> <p>Gastric ulcer</p> <p>Gasto-oesophageal reflux disease</p> <p>Hepatitis</p> <p>H. pylori infection</p> <p>Crohns disease</p> <p>Ulcerative colitis</p> <p>Other inflammatory bowel diseases</p> <p>Irritable Bowel Syndrome</p> <p>Lactose intolerance</p> <p>Liver disease</p> <p>Pancreatitis</p> <p>Gastrointestinal malignancy or polyps</p> | <p><input type="checkbox"/> Yes <input type="checkbox"/> No</p> <p>Exclude if Inflammatory Bowel Disease, Irritable Bowel Syndrome, GI malignancy, Hepatitis</p> |
| 21<br>22<br>23<br>24                                                                                        | <p>Is there any family history of inflammatory Bowel Disease or colorectal cancer?</p>                                                                                                                                                                                                                                                                                      | <p><input type="checkbox"/> Yes <input type="checkbox"/> No</p> <p>Exclude if Yes</p>                                                                                                                                                                                                                                                                                                                                                                                                                                                                                                                                                                                                                                                                                                                                                                                                                                                                                                                                            |
| 25<br>26<br>27                                                                                              | <p>Have you taken any antibiotics in the last 3 months?</p>                                                                                                                                                                                                                                                                                                                 | <p><input type="checkbox"/> Yes <input type="checkbox"/> No</p> <p>Exclude if Yes</p>                                                                                                                                                                                                                                                                                                                                                                                                                                                                                                                                                                                                                                                                                                                                                                                                                                                                                                                                            |
| 28<br>29<br>30                                                                                              | <p>Have you had a fever in the last 2 weeks?</p>                                                                                                                                                                                                                                                                                                                            | <p><input type="checkbox"/> Yes <input type="checkbox"/> No</p> <p>Exclude if Yes</p>                                                                                                                                                                                                                                                                                                                                                                                                                                                                                                                                                                                                                                                                                                                                                                                                                                                                                                                                            |
| 31<br>32<br>33<br>34<br>35                                                                                  | <p>Have you received a live vaccination within the past 6 months?</p>                                                                                                                                                                                                                                                                                                       | <p><input type="checkbox"/> Yes <input type="checkbox"/> No</p> <p>Exclude if Yes</p>                                                                                                                                                                                                                                                                                                                                                                                                                                                                                                                                                                                                                                                                                                                                                                                                                                                                                                                                            |
| 36<br>37<br>38                                                                                              | <p>Have you ever been incarcerated in prison?</p>                                                                                                                                                                                                                                                                                                                           | <p><input type="checkbox"/> Yes <input type="checkbox"/> No</p> <p>Exclude if in past 4 months</p>                                                                                                                                                                                                                                                                                                                                                                                                                                                                                                                                                                                                                                                                                                                                                                                                                                                                                                                               |
| 39<br>40<br>41<br>42<br>43<br>44                                                                            | <p>Have you ever been immunosuppressed (e.g. during treatment for cancer, or for a solid organ transplant)?<br/>If yes, when and why?</p>                                                                                                                                                                                                                                   | <p><input type="checkbox"/> Yes <input type="checkbox"/> No</p>                                                                                                                                                                                                                                                                                                                                                                                                                                                                                                                                                                                                                                                                                                                                                                                                                                                                                                                                                                  |
| 45<br>46<br>47<br>48                                                                                        | <p>Have you ever had major gastrointestinal surgery?<br/>If yes, when and why?</p>                                                                                                                                                                                                                                                                                          | <p><input type="checkbox"/> Yes <input type="checkbox"/> No</p> <p>Relative exclusion criteria</p>                                                                                                                                                                                                                                                                                                                                                                                                                                                                                                                                                                                                                                                                                                                                                                                                                                                                                                                               |
| 49<br>50<br>51                                                                                              | <p>Have you ever suffered from metabolic syndrome or diabetes?</p>                                                                                                                                                                                                                                                                                                          | <p><input type="checkbox"/> Yes <input type="checkbox"/> No</p> <p>Exclude if Yes</p>                                                                                                                                                                                                                                                                                                                                                                                                                                                                                                                                                                                                                                                                                                                                                                                                                                                                                                                                            |
| 52<br>53<br>54<br>55<br>56<br>57                                                                            | <p>Have you ever suffered from any autoimmune condition (e.g. rheumatoid), asthma or eczema?<br/>If yes, which, and do you take any treatment?</p>                                                                                                                                                                                                                          | <p><input type="checkbox"/> Yes <input type="checkbox"/> No</p> <p>Relative exclusion criteria</p>                                                                                                                                                                                                                                                                                                                                                                                                                                                                                                                                                                                                                                                                                                                                                                                                                                                                                                                               |
| 58<br>59<br>60                                                                                              | <p>Have you ever had any chronic pain or fatigue syndromes e.g.</p>                                                                                                                                                                                                                                                                                                         | <p><input type="checkbox"/> Yes <input type="checkbox"/> No</p>                                                                                                                                                                                                                                                                                                                                                                                                                                                                                                                                                                                                                                                                                                                                                                                                                                                                                                                                                                  |

|                                                                                                                                                                                                                                                                                                                                                                                                                                                                                                                                                                                                                                                                                                                                                                                                 |                                                                                       |
|-------------------------------------------------------------------------------------------------------------------------------------------------------------------------------------------------------------------------------------------------------------------------------------------------------------------------------------------------------------------------------------------------------------------------------------------------------------------------------------------------------------------------------------------------------------------------------------------------------------------------------------------------------------------------------------------------------------------------------------------------------------------------------------------------|---------------------------------------------------------------------------------------|
| <p>1<br/>2<br/>3<br/>4<br/>5<br/>6<br/>7<br/>8<br/>9<br/>10<br/>11<br/>12<br/>13<br/>14<br/>15<br/>16<br/>17<br/>18<br/>19<br/>20<br/>21<br/>22<br/>23<br/>24<br/>25<br/>26<br/>27<br/>28<br/>29</p> <p>chronic fatigue syndrome,<br/>fibromyalgia?<br/>If yes, which?</p>                                                                                                                                                                                                                                                                                                                                                                                                                                                                                                                      | <p>Exclude if Yes</p>                                                                 |
| <p>30<br/>31<br/>32<br/>33<br/>34<br/>35<br/>36<br/>37<br/>38<br/>39<br/>40<br/>41<br/>42<br/>43<br/>44<br/>45<br/>46<br/>47<br/>48<br/>49<br/>50<br/>51<br/>52<br/>53<br/>54<br/>55<br/>56<br/>57<br/>58<br/>59<br/>60</p> <p>Have you any history of CJD or other prion disease in your family? If yes, please specify<br/>Patients should be considered to be at risk from genetic forms of CJD if they have or have had</p> <ol style="list-style-type: none"> <li>1. Genetic testing, which has indicated they are at significant risk of developing CJD or other prion disease</li> <li>2. A blood relative known to have a genetic mutation indicative of genetic CJD or other prion disease</li> <li>3. Two or more blood relatives affected by CJD or other prion disease</li> </ol>   | <p><input type="checkbox"/> Yes <input type="checkbox"/> No</p> <p>Exclude if Yes</p> |
| <p>Have you ever received growth hormone or gonadotrophic treatment? If yes, please specify;</p> <ol style="list-style-type: none"> <li>i) Whether the hormone was derived from human pituitary glands</li> <li>ii) The year of the treatment</li> <li>iii) Whether the treatment was received in the UK or in another country</li> </ol> <p>Recipients of hormone derived from human pituitary glands e.g. growth hormone or gonadotrophin have been identified as potentially at risk of CJD. In the UK, the use of human growth hormone was stopped in 1985 but human-derived products may have been continued to be used in other countries. In the UK, the use of human-derived gonadotrophin was discontinued in 1973 but may have been continued in other countries after this time.</p> | <p><input type="checkbox"/> Yes <input type="checkbox"/> No</p> <p>Exclude if Yes</p> |

|                                                                                                                                                                                                                                                                                                                                                                                                                                                                                                                                                                                                                                            |                                                                                                                             |
|--------------------------------------------------------------------------------------------------------------------------------------------------------------------------------------------------------------------------------------------------------------------------------------------------------------------------------------------------------------------------------------------------------------------------------------------------------------------------------------------------------------------------------------------------------------------------------------------------------------------------------------------|-----------------------------------------------------------------------------------------------------------------------------|
| <p>1<br/>2<br/>3<br/>4 Have you ever had surgery on<br/>5 your brain or spinal cord?<br/>6 People who underwent intradural<br/>7 neurosurgical or spinal<br/>8 procedures before August 1992<br/>9 may have received a graft of<br/>10 human-derived dura mater and<br/>11 should be treated as at increased<br/>12 risk, unless evidence can be<br/>13 provided that human-derived<br/>14 dura mater was not used. Patients<br/>15 who received a graft of human-<br/>16 derived dura mater between 1980<br/>17 and August 1992 are at increased<br/>18 risk of both sporadic CJD and<br/>19 vCJD.<br/>20<br/>21<br/>22<br/>23<br/>24</p> | <p><input type="checkbox"/> Yes <input type="checkbox"/> No</p> <p>Exclude if Yes</p>                                       |
| <p>25 Are you normally resident in the<br/>26 UK?<br/>27 If No state country of usual<br/>28 residence<br/>29<br/>30</p>                                                                                                                                                                                                                                                                                                                                                                                                                                                                                                                   | <p><input type="checkbox"/> Yes <input type="checkbox"/> No</p>                                                             |
| <p>31 Which countries have you visited<br/>32 in the last 12 months and what<br/>33 was the duration of stay?<br/>34<br/>35<br/>36<br/>37<br/>38<br/>39<br/>40<br/>41</p>                                                                                                                                                                                                                                                                                                                                                                                                                                                                  | <p>Relative exclusions apply to tropical countries</p>                                                                      |
| <p>42 In the past 12 months have you<br/>43 been admitted to a hospital in a<br/>44 country other than the UK?<br/>45<br/>46 If yes state when and which<br/>47 countries<br/>48</p>                                                                                                                                                                                                                                                                                                                                                                                                                                                       | <p><input type="checkbox"/> Yes <input type="checkbox"/> No</p>                                                             |
| <p>49 Are you taking any regular<br/>50 medications?<br/>51<br/>52 List all current medications:<br/>53<br/>54<br/>55<br/>56<br/>57<br/>58<br/>59<br/>60</p>                                                                                                                                                                                                                                                                                                                                                                                                                                                                               | <p><input type="checkbox"/> Yes <input type="checkbox"/> No</p> <p>Exclude if any regular prescribed drugs (except OCP)</p> |

1  
2  
3  
4  
5  
6  
7  
8  
9  
10  
11  
12  
13  
14  
15  
16  
17  
18  
19  
20  
21  
22  
23  
24  
25  
26  
27  
28  
29  
30  
31  
32  
33  
34  
35  
36  
37  
38  
39  
40  
41  
42  
43  
44  
45  
46  
47  
48  
49  
50  
51  
52  
53  
54  
55  
56  
57  
58  
59  
60

|  |  |
|--|--|
|  |  |
|--|--|

For peer review only

# Reporting checklist for protocol of a clinical trial.

Based on the SPIRIT guidelines.

## Instructions to authors

Complete this checklist by entering the page numbers from your manuscript where readers will find each of the items listed below.

Your article may not currently address all the items on the checklist. Please modify your text to include the missing information. If you are certain that an item does not apply, please write "n/a" and provide a short explanation.

Upload your completed checklist as an extra file when you submit to a journal.

In your methods section, say that you used the SPIRIT reporting guidelines, and cite them as:

Chan A-W, Tetzlaff JM, Altman DG, Laupacis A, Gøtzsche PC, Krleža-Jerić K, Hróbjartsson A, Mann H, Dickersin K, Berlin J, Doré C, Parulekar W, Summerskill W, Groves T, Schulz K, Sox H, Rockhold FW, Rennie D, Moher D. SPIRIT 2013 Statement: Defining standard protocol items for clinical trials. *Ann Intern Med.* 2013;158(3):200-207

|                                             |                     | Reporting Item                                                                                               | Page Number |
|---------------------------------------------|---------------------|--------------------------------------------------------------------------------------------------------------|-------------|
| <b>Administrative information</b>           |                     |                                                                                                              |             |
| Title                                       | <a href="#">#1</a>  | Descriptive title identifying the study design, population, interventions, and, if applicable, trial acronym | 1           |
| Trial registration                          | <a href="#">#2a</a> | Trial identifier and registry name. If not yet registered, name of intended registry                         | 2           |
| Trial registration: data set                | <a href="#">#2b</a> | All items from the World Health Organization Trial Registration Data Set                                     | 4           |
| Protocol version                            | <a href="#">#3</a>  | Date and version identifier                                                                                  | 2           |
| Funding                                     | <a href="#">#4</a>  | Sources and types of financial, material, and other support                                                  | 13          |
| Roles and responsibilities: contributorship | <a href="#">#5a</a> | Names, affiliations, and roles of protocol contributors                                                      | 13          |



|    |                           |                     |                                                                    |        |
|----|---------------------------|---------------------|--------------------------------------------------------------------|--------|
| 1  | Roles and                 | <a href="#">#5b</a> | Name and contact information for the trial sponsor                 | 13     |
| 2  | responsibilities:         |                     |                                                                    |        |
| 3  | sponsor contact           |                     |                                                                    |        |
| 4  | information               |                     |                                                                    |        |
| 5  |                           |                     |                                                                    |        |
| 6  |                           |                     |                                                                    |        |
| 7  |                           |                     |                                                                    |        |
| 8  | Roles and                 | <a href="#">#5c</a> | Role of study sponsor and funders, if any, in study design;        | 13, 14 |
| 9  | responsibilities:         |                     | collection, management, analysis, and interpretation of data;      |        |
| 10 | sponsor and funder        |                     | writing of the report; and the decision to submit the report for   |        |
| 11 |                           |                     | publication, including whether they will have ultimate authority   |        |
| 12 |                           |                     | over any of these activities                                       |        |
| 13 |                           |                     |                                                                    |        |
| 14 |                           |                     |                                                                    |        |
| 15 |                           |                     |                                                                    |        |
| 16 | Roles and                 | <a href="#">#5d</a> | Composition, roles, and responsibilities of the coordinating       | 12     |
| 17 | responsibilities:         |                     | centre, steering committee, endpoint adjudication committee,       |        |
| 18 | committees                |                     | data management team, and other individuals or groups              |        |
| 19 |                           |                     | overseeing the trial, if applicable (see Item 21a for data         |        |
| 20 |                           |                     | monitoring committee)                                              |        |
| 21 |                           |                     |                                                                    |        |
| 22 |                           |                     |                                                                    |        |
| 23 |                           |                     |                                                                    |        |
| 24 | <b>Introduction</b>       |                     |                                                                    |        |
| 25 |                           |                     |                                                                    |        |
| 26 |                           |                     |                                                                    |        |
| 27 | Background and            | <a href="#">#6a</a> | Description of research question and justification for undertaking | 3      |
| 28 | rationale                 |                     | the trial, including summary of relevant studies (published and    |        |
| 29 |                           |                     | unpublished) examining benefits and harms for each intervention    |        |
| 30 |                           |                     |                                                                    |        |
| 31 |                           |                     |                                                                    |        |
| 32 | Background and            | <a href="#">#6b</a> | Explanation for choice of comparators                              | 4      |
| 33 | rationale: choice of      |                     |                                                                    |        |
| 34 | comparators               |                     |                                                                    |        |
| 35 |                           |                     |                                                                    |        |
| 36 |                           |                     |                                                                    |        |
| 37 | Objectives                | <a href="#">#7</a>  | Specific objectives or hypotheses                                  | 4      |
| 38 |                           |                     |                                                                    |        |
| 39 |                           |                     |                                                                    |        |
| 40 | Trial design              | <a href="#">#8</a>  | Description of trial design including type of trial (eg, parallel  | 5      |
| 41 |                           |                     | group, crossover, factorial, single group), allocation ratio, and  |        |
| 42 |                           |                     | framework (eg, superiority, equivalence, non-inferiority,          |        |
| 43 |                           |                     | exploratory)                                                       |        |
| 44 |                           |                     |                                                                    |        |
| 45 |                           |                     |                                                                    |        |
| 46 | <b>Methods:</b>           |                     |                                                                    |        |
| 47 | <b>Participants,</b>      |                     |                                                                    |        |
| 48 | <b>interventions, and</b> |                     |                                                                    |        |
| 49 | <b>outcomes</b>           |                     |                                                                    |        |
| 50 |                           |                     |                                                                    |        |
| 51 |                           |                     |                                                                    |        |
| 52 |                           |                     |                                                                    |        |
| 53 | Study setting             | <a href="#">#9</a>  | Description of study settings (eg, community clinic, academic      | 7      |
| 54 |                           |                     | hospital) and list of countries where data will be collected.      |        |
| 55 |                           |                     | Reference to where list of study sites can be obtained             |        |
| 56 |                           |                     |                                                                    |        |
| 57 |                           |                     |                                                                    |        |
| 58 |                           |                     |                                                                    |        |
| 59 |                           |                     |                                                                    |        |
| 60 |                           |                     |                                                                    |        |

|    |                              |                      |                                                                                                                                                                                                                                                                                                                                                                                |    |
|----|------------------------------|----------------------|--------------------------------------------------------------------------------------------------------------------------------------------------------------------------------------------------------------------------------------------------------------------------------------------------------------------------------------------------------------------------------|----|
| 1  | Eligibility criteria         | <a href="#">#10</a>  | Inclusion and exclusion criteria for participants. If applicable, eligibility criteria for study centres and individuals who will perform the interventions (eg, surgeons, psychotherapists)                                                                                                                                                                                   | 6  |
| 2  |                              |                      |                                                                                                                                                                                                                                                                                                                                                                                |    |
| 3  |                              |                      |                                                                                                                                                                                                                                                                                                                                                                                |    |
| 4  |                              |                      |                                                                                                                                                                                                                                                                                                                                                                                |    |
| 5  |                              |                      |                                                                                                                                                                                                                                                                                                                                                                                |    |
| 6  | Interventions:               | <a href="#">#11a</a> | Interventions for each group with sufficient detail to allow replication, including how and when they will be administered                                                                                                                                                                                                                                                     | 8  |
| 7  | description                  |                      |                                                                                                                                                                                                                                                                                                                                                                                |    |
| 8  |                              |                      |                                                                                                                                                                                                                                                                                                                                                                                |    |
| 9  |                              |                      |                                                                                                                                                                                                                                                                                                                                                                                |    |
| 10 | Interventions:               | <a href="#">#11b</a> | Criteria for discontinuing or modifying allocated interventions for a given trial participant (eg, drug dose change in response to harms, participant request, or improving / worsening disease)                                                                                                                                                                               | 8  |
| 11 | modifications                |                      |                                                                                                                                                                                                                                                                                                                                                                                |    |
| 12 |                              |                      |                                                                                                                                                                                                                                                                                                                                                                                |    |
| 13 |                              |                      |                                                                                                                                                                                                                                                                                                                                                                                |    |
| 14 |                              |                      |                                                                                                                                                                                                                                                                                                                                                                                |    |
| 15 | Interventions:               | <a href="#">#11c</a> | Strategies to improve adherence to intervention protocols, and any procedures for monitoring adherence (eg, drug tablet return; laboratory tests)                                                                                                                                                                                                                              | 8  |
| 16 | adherence                    |                      |                                                                                                                                                                                                                                                                                                                                                                                |    |
| 17 |                              |                      |                                                                                                                                                                                                                                                                                                                                                                                |    |
| 18 |                              |                      |                                                                                                                                                                                                                                                                                                                                                                                |    |
| 19 |                              |                      |                                                                                                                                                                                                                                                                                                                                                                                |    |
| 20 |                              |                      |                                                                                                                                                                                                                                                                                                                                                                                |    |
| 21 | Interventions:               | <a href="#">#11d</a> | Relevant concomitant care and interventions that are permitted or prohibited during the trial                                                                                                                                                                                                                                                                                  | 8  |
| 22 | concomitant care             |                      |                                                                                                                                                                                                                                                                                                                                                                                |    |
| 23 |                              |                      |                                                                                                                                                                                                                                                                                                                                                                                |    |
| 24 |                              |                      |                                                                                                                                                                                                                                                                                                                                                                                |    |
| 25 | Outcomes                     | <a href="#">#12</a>  | Primary, secondary, and other outcomes, including the specific measurement variable (eg, systolic blood pressure), analysis metric (eg, change from baseline, final value, time to event), method of aggregation (eg, median, proportion), and time point for each outcome. Explanation of the clinical relevance of chosen efficacy and harm outcomes is strongly recommended | 9  |
| 26 |                              |                      |                                                                                                                                                                                                                                                                                                                                                                                |    |
| 27 |                              |                      |                                                                                                                                                                                                                                                                                                                                                                                |    |
| 28 |                              |                      |                                                                                                                                                                                                                                                                                                                                                                                |    |
| 29 |                              |                      |                                                                                                                                                                                                                                                                                                                                                                                |    |
| 30 |                              |                      |                                                                                                                                                                                                                                                                                                                                                                                |    |
| 31 |                              |                      |                                                                                                                                                                                                                                                                                                                                                                                |    |
| 32 |                              |                      |                                                                                                                                                                                                                                                                                                                                                                                |    |
| 33 |                              |                      |                                                                                                                                                                                                                                                                                                                                                                                |    |
| 34 | Participant timeline         | <a href="#">#13</a>  | Time schedule of enrolment, interventions (including any run-ins and washouts), assessments, and visits for participants. A schematic diagram is highly recommended (see Figure)                                                                                                                                                                                               | 9  |
| 35 |                              |                      |                                                                                                                                                                                                                                                                                                                                                                                |    |
| 36 |                              |                      |                                                                                                                                                                                                                                                                                                                                                                                |    |
| 37 |                              |                      |                                                                                                                                                                                                                                                                                                                                                                                |    |
| 38 |                              |                      |                                                                                                                                                                                                                                                                                                                                                                                |    |
| 39 |                              |                      |                                                                                                                                                                                                                                                                                                                                                                                |    |
| 40 | Sample size                  | <a href="#">#14</a>  | Estimated number of participants needed to achieve study objectives and how it was determined, including clinical and statistical assumptions supporting any sample size calculations                                                                                                                                                                                          | 11 |
| 41 |                              |                      |                                                                                                                                                                                                                                                                                                                                                                                |    |
| 42 |                              |                      |                                                                                                                                                                                                                                                                                                                                                                                |    |
| 43 |                              |                      |                                                                                                                                                                                                                                                                                                                                                                                |    |
| 44 |                              |                      |                                                                                                                                                                                                                                                                                                                                                                                |    |
| 45 | Recruitment                  | <a href="#">#15</a>  | Strategies for achieving adequate participant enrolment to reach target sample size                                                                                                                                                                                                                                                                                            | 7  |
| 46 |                              |                      |                                                                                                                                                                                                                                                                                                                                                                                |    |
| 47 |                              |                      |                                                                                                                                                                                                                                                                                                                                                                                |    |
| 48 |                              |                      |                                                                                                                                                                                                                                                                                                                                                                                |    |
| 49 | <b>Methods: Assignment</b>   |                      |                                                                                                                                                                                                                                                                                                                                                                                |    |
| 50 | <b>of interventions (for</b> |                      |                                                                                                                                                                                                                                                                                                                                                                                |    |
| 51 | <b>controlled trials)</b>    |                      |                                                                                                                                                                                                                                                                                                                                                                                |    |
| 52 |                              |                      |                                                                                                                                                                                                                                                                                                                                                                                |    |
| 53 |                              |                      |                                                                                                                                                                                                                                                                                                                                                                                |    |
| 54 | Allocation: sequence         | <a href="#">#16a</a> | Method of generating the allocation sequence (eg, computer-generated random numbers), and list of any factors for stratification. To reduce predictability of a random sequence, details of any planned restriction (eg, blocking) should be                                                                                                                                   | 8  |
| 55 | generation                   |                      |                                                                                                                                                                                                                                                                                                                                                                                |    |
| 56 |                              |                      |                                                                                                                                                                                                                                                                                                                                                                                |    |
| 57 |                              |                      |                                                                                                                                                                                                                                                                                                                                                                                |    |
| 58 |                              |                      |                                                                                                                                                                                                                                                                                                                                                                                |    |
| 59 |                              |                      |                                                                                                                                                                                                                                                                                                                                                                                |    |
| 60 |                              |                      |                                                                                                                                                                                                                                                                                                                                                                                |    |

provided in a separate document that is unavailable to those who enrol participants or assign interventions

|    |                        |                      |                                                                     |
|----|------------------------|----------------------|---------------------------------------------------------------------|
| 1  |                        |                      |                                                                     |
| 2  |                        |                      |                                                                     |
| 3  |                        |                      |                                                                     |
| 4  | Allocation             | <a href="#">#16b</a> | Mechanism of implementing the allocation sequence (eg, central      |
| 5  | concealment            |                      | telephone; sequentially numbered, opaque, sealed envelopes),        |
| 6  |                        |                      | describing any steps to conceal the sequence until interventions    |
| 7  | mechanism              |                      | are assigned                                                        |
| 8  |                        |                      |                                                                     |
| 9  |                        |                      |                                                                     |
| 10 |                        |                      |                                                                     |
| 11 | Allocation:            | <a href="#">#16c</a> | Who will generate the allocation sequence, who will enrol           |
| 12 | implementation         |                      | participants, and who will assign participants to interventions     |
| 13 |                        |                      |                                                                     |
| 14 | Blinding (masking)     | <a href="#">#17a</a> | Who will be blinded after assignment to interventions (eg, trial    |
| 15 |                        |                      | participants, care providers, outcome assessors, data analysts),    |
| 16 |                        |                      | and how                                                             |
| 17 |                        |                      |                                                                     |
| 18 |                        |                      |                                                                     |
| 19 |                        |                      |                                                                     |
| 20 | Blinding (masking):    | <a href="#">#17b</a> | If blinded, circumstances under which unblinding is permissible,    |
| 21 | emergency unblinding   |                      | and procedure for revealing a participant's allocated intervention  |
| 22 |                        |                      | during the trial                                                    |
| 23 |                        |                      |                                                                     |
| 24 |                        |                      |                                                                     |
| 25 | <b>Methods: Data</b>   |                      |                                                                     |
| 26 | <b>collection,</b>     |                      |                                                                     |
| 27 | <b>management, and</b> |                      |                                                                     |
| 28 | <b>analysis</b>        |                      |                                                                     |
| 29 |                        |                      |                                                                     |
| 30 |                        |                      |                                                                     |
| 31 |                        |                      |                                                                     |
| 32 | Data collection plan   | <a href="#">#18a</a> | Plans for assessment and collection of outcome, baseline, and       |
| 33 |                        |                      | other trial data, including any related processes to promote data   |
| 34 |                        |                      | quality (eg, duplicate measurements, training of assessors) and a   |
| 35 |                        |                      | description of study instruments (eg, questionnaires, laboratory    |
| 36 |                        |                      | tests) along with their reliability and validity, if known.         |
| 37 |                        |                      | Reference to where data collection forms can be found, if not in    |
| 38 |                        |                      | the protocol                                                        |
| 39 |                        |                      |                                                                     |
| 40 |                        |                      |                                                                     |
| 41 |                        |                      |                                                                     |
| 42 |                        |                      |                                                                     |
| 43 | Data collection plan:  | <a href="#">#18b</a> | Plans to promote participant retention and complete follow-up,      |
| 44 | retention              |                      | including list of any outcome data to be collected for participants |
| 45 |                        |                      | who discontinue or deviate from intervention protocols              |
| 46 |                        |                      |                                                                     |
| 47 |                        |                      |                                                                     |
| 48 | Data management        | <a href="#">#19</a>  | Plans for data entry, coding, security, and storage, including any  |
| 49 |                        |                      | related processes to promote data quality (eg, double data entry;   |
| 50 |                        |                      | range checks for data values). Reference to where details of data   |
| 51 |                        |                      | management procedures can be found, if not in the protocol          |
| 52 |                        |                      |                                                                     |
| 53 |                        |                      |                                                                     |
| 54 |                        |                      |                                                                     |
| 55 | Statistics: outcomes   | <a href="#">#20a</a> | Statistical methods for analysing primary and secondary             |
| 56 |                        |                      | outcomes. Reference to where other details of the statistical       |
| 57 |                        |                      | analysis plan can be found, if not in the protocol                  |
| 58 |                        |                      |                                                                     |
| 59 |                        |                      |                                                                     |
| 60 |                        |                      |                                                                     |

|    |                            |                      |                                                                    |    |
|----|----------------------------|----------------------|--------------------------------------------------------------------|----|
| 1  | Statistics: additional     | <a href="#">#20b</a> | Methods for any additional analyses (eg, subgroup and adjusted     | 12 |
| 2  | analyses                   |                      | analyses)                                                          |    |
| 3  |                            |                      |                                                                    |    |
| 4  | Statistics: analysis       | <a href="#">#20c</a> | Definition of analysis population relating to protocol non-        | 12 |
| 5  | population and missing     |                      | adherence (eg, as randomised analysis), and any statistical        |    |
| 6  | data                       |                      | methods to handle missing data (eg, multiple imputation)           |    |
| 7  |                            |                      |                                                                    |    |
| 8  |                            |                      |                                                                    |    |
| 9  |                            |                      |                                                                    |    |
| 10 | <b>Methods: Monitoring</b> |                      |                                                                    |    |
| 11 |                            |                      |                                                                    |    |
| 12 | Data monitoring:           | <a href="#">#21a</a> | Composition of data monitoring committee (DMC); summary of         | 12 |
| 13 | formal committee           |                      | its role and reporting structure; statement of whether it is       |    |
| 14 |                            |                      | independent from the sponsor and competing interests; and          |    |
| 15 |                            |                      | reference to where further details about its charter can be found, |    |
| 16 |                            |                      | if not in the protocol. Alternatively, an explanation of why a     |    |
| 17 |                            |                      | DMC is not needed                                                  |    |
| 18 |                            |                      |                                                                    |    |
| 19 |                            |                      |                                                                    |    |
| 20 |                            |                      |                                                                    |    |
| 21 |                            |                      |                                                                    |    |
| 22 | Data monitoring:           | <a href="#">#21b</a> | Description of any interim analyses and stopping guidelines,       | 12 |
| 23 | interim analysis           |                      | including who will have access to these interim results and make   |    |
| 24 |                            |                      | the final decision to terminate the trial                          |    |
| 25 |                            |                      |                                                                    |    |
| 26 |                            |                      |                                                                    |    |
| 27 | Harms                      | <a href="#">#22</a>  | Plans for collecting, assessing, reporting, and managing solicited | 12 |
| 28 |                            |                      | and spontaneously reported adverse events and other unintended     |    |
| 29 |                            |                      | effects of trial interventions or trial conduct                    |    |
| 30 |                            |                      |                                                                    |    |
| 31 |                            |                      |                                                                    |    |
| 32 |                            |                      |                                                                    |    |
| 33 | Auditing                   | <a href="#">#23</a>  | Frequency and procedures for auditing trial conduct, if any, and   | 12 |
| 34 |                            |                      | whether the process will be independent from investigators and     |    |
| 35 |                            |                      | the sponsor                                                        |    |
| 36 |                            |                      |                                                                    |    |
| 37 |                            |                      |                                                                    |    |
| 38 | <b>Ethics and</b>          |                      |                                                                    |    |
| 39 | <b>dissemination</b>       |                      |                                                                    |    |
| 40 |                            |                      |                                                                    |    |
| 41 |                            |                      |                                                                    |    |
| 42 | Research ethics            | <a href="#">#24</a>  | Plans for seeking research ethics committee / institutional review | 13 |
| 43 | approval                   |                      | board (REC / IRB) approval                                         |    |
| 44 |                            |                      |                                                                    |    |
| 45 |                            |                      |                                                                    |    |
| 46 | Protocol amendments        | <a href="#">#25</a>  | Plans for communicating important protocol modifications (eg,      | 13 |
| 47 |                            |                      | changes to eligibility criteria, outcomes, analyses) to relevant   |    |
| 48 |                            |                      | parties (eg, investigators, REC / IRBs, trial participants, trial  |    |
| 49 |                            |                      | registries, journals, regulators)                                  |    |
| 50 |                            |                      |                                                                    |    |
| 51 |                            |                      |                                                                    |    |
| 52 |                            |                      |                                                                    |    |
| 53 | Consent or assent          | <a href="#">#26a</a> | Who will obtain informed consent or assent from potential trial    | 7  |
| 54 |                            |                      | participants or authorised surrogates, and how (see Item 32)       |    |
| 55 |                            |                      |                                                                    |    |
| 56 |                            |                      |                                                                    |    |
| 57 |                            |                      |                                                                    |    |
| 58 |                            |                      |                                                                    |    |
| 59 |                            |                      |                                                                    |    |
| 60 |                            |                      |                                                                    |    |

|    |                          |                      |                                                                      |    |
|----|--------------------------|----------------------|----------------------------------------------------------------------|----|
| 1  | Consent or assent:       | <a href="#">#26b</a> | Additional consent provisions for collection and use of              | 7  |
| 2  | ancillary studies        |                      | participant data and biological specimens in ancillary studies, if   |    |
| 3  |                          |                      | applicable                                                           |    |
| 4  |                          |                      |                                                                      |    |
| 5  |                          |                      |                                                                      |    |
| 6  | Confidentiality          | <a href="#">#27</a>  | How personal information about potential and enrolled                | 7  |
| 7  |                          |                      | participants will be collected, shared, and maintained in order to   |    |
| 8  |                          |                      | protect confidentiality before, during, and after the trial          |    |
| 9  |                          |                      |                                                                      |    |
| 10 |                          |                      |                                                                      |    |
| 11 | Declaration of interests | <a href="#">#28</a>  | Financial and other competing interests for principal investigators  | 14 |
| 12 |                          |                      | for the overall trial and each study site                            |    |
| 13 |                          |                      |                                                                      |    |
| 14 |                          |                      |                                                                      |    |
| 15 | Data access              | <a href="#">#29</a>  | Statement of who will have access to the final trial dataset, and    | 12 |
| 16 |                          |                      | disclosure of contractual agreements that limit such access for      |    |
| 17 |                          |                      | investigators                                                        |    |
| 18 |                          |                      |                                                                      |    |
| 19 |                          |                      |                                                                      |    |
| 20 | Ancillary and post trial | <a href="#">#30</a>  | Provisions, if any, for ancillary and post-trial care, and for       | 12 |
| 21 | care                     |                      | compensation to those who suffer harm from trial participation       |    |
| 22 |                          |                      |                                                                      |    |
| 23 |                          |                      |                                                                      |    |
| 24 | Dissemination policy:    | <a href="#">#31a</a> | Plans for investigators and sponsor to communicate trial results     | 12 |
| 25 | trial results            |                      | to participants, healthcare professionals, the public, and other     |    |
| 26 |                          |                      | relevant groups (eg, via publication, reporting in results           |    |
| 27 |                          |                      | databases, or other data sharing arrangements), including any        |    |
| 28 |                          |                      | publication restrictions                                             |    |
| 29 |                          |                      |                                                                      |    |
| 30 |                          |                      |                                                                      |    |
| 31 |                          |                      |                                                                      |    |
| 32 |                          |                      |                                                                      |    |
| 33 | Dissemination policy:    | <a href="#">#31b</a> | Authorship eligibility guidelines and any intended use of            | 12 |
| 34 | authorship               |                      | professional writers                                                 |    |
| 35 |                          |                      |                                                                      |    |
| 36 |                          |                      |                                                                      |    |
| 37 | Dissemination policy:    | <a href="#">#31c</a> | Plans, if any, for granting public access to the full protocol,      | 12 |
| 38 | reproducible research    |                      | participant-level dataset, and statistical code                      |    |
| 39 |                          |                      |                                                                      |    |
| 40 |                          |                      |                                                                      |    |
| 41 | <b>Appendices</b>        |                      |                                                                      |    |
| 42 |                          |                      |                                                                      |    |
| 43 | Informed consent         | <a href="#">#32</a>  | Model consent form and other related documentation given to          | 3  |
| 44 | materials                |                      | participants and authorised surrogates                               |    |
| 45 |                          |                      |                                                                      |    |
| 46 |                          |                      |                                                                      |    |
| 47 | Biological specimens     | <a href="#">#33</a>  | Plans for collection, laboratory evaluation, and storage of          | 9  |
| 48 |                          |                      | biological specimens for genetic or molecular analysis in the        |    |
| 49 |                          |                      | current trial and for future use in ancillary studies, if applicable |    |
| 50 |                          |                      |                                                                      |    |
| 51 |                          |                      |                                                                      |    |

The SPIRIT checklist is distributed under the terms of the Creative Commons Attribution License CC-BY-ND 3.0. This checklist was completed on 26. March 2020 using <https://www.goodreports.org/>, a tool made by the [EQUATOR Network](#) in collaboration with [Penelope.ai](#)

# BMJ Open

## Protocol: A prospective, randomised placebo-controlled feasibility trial of Faecal microbiota Transplant to ERadicate gastrointestinal carriage of Antibiotic Resistant Organisms (FERARO)

|                                 |                                                                                                                                                                                                                                                                                                                                                                                                                                                                                                                                                                                                                                                                                                                                                                                                                                                                                                                                                                                                                                                                                                                                                                                                                                                                                                                                                                                                                                                                                      |
|---------------------------------|--------------------------------------------------------------------------------------------------------------------------------------------------------------------------------------------------------------------------------------------------------------------------------------------------------------------------------------------------------------------------------------------------------------------------------------------------------------------------------------------------------------------------------------------------------------------------------------------------------------------------------------------------------------------------------------------------------------------------------------------------------------------------------------------------------------------------------------------------------------------------------------------------------------------------------------------------------------------------------------------------------------------------------------------------------------------------------------------------------------------------------------------------------------------------------------------------------------------------------------------------------------------------------------------------------------------------------------------------------------------------------------------------------------------------------------------------------------------------------------|
| Journal:                        | <i>BMJ Open</i>                                                                                                                                                                                                                                                                                                                                                                                                                                                                                                                                                                                                                                                                                                                                                                                                                                                                                                                                                                                                                                                                                                                                                                                                                                                                                                                                                                                                                                                                      |
| Manuscript ID                   | bmjopen-2020-038847.R1                                                                                                                                                                                                                                                                                                                                                                                                                                                                                                                                                                                                                                                                                                                                                                                                                                                                                                                                                                                                                                                                                                                                                                                                                                                                                                                                                                                                                                                               |
| Article Type:                   | Protocol                                                                                                                                                                                                                                                                                                                                                                                                                                                                                                                                                                                                                                                                                                                                                                                                                                                                                                                                                                                                                                                                                                                                                                                                                                                                                                                                                                                                                                                                             |
| Date Submitted by the Author:   | 03-Apr-2020                                                                                                                                                                                                                                                                                                                                                                                                                                                                                                                                                                                                                                                                                                                                                                                                                                                                                                                                                                                                                                                                                                                                                                                                                                                                                                                                                                                                                                                                          |
| Complete List of Authors:       | <p>Merrick, Blair; Guy's and Saint Thomas' Hospitals NHS Trust, Centre for Clinical Infection and Diagnostics Research; King's College London Faculty of Life Sciences and Medicine</p> <p>Robinson, Emily; King's College London, School of Population Health and Environmental Sciences</p> <p>Bunce, Catey; King's College London, Primary Care and Public Health Sciences</p> <p>Allen, Liz; Guy's and Saint Thomas' Hospitals NHS Trust; IQVIA Reading</p> <p>BIsnauthsing, Karen; Guy's and Saint Thomas' Hospitals NHS Trust, Centre for Clinical Infection and Diagnostics Research</p> <p>Izundu, Chi Chi</p> <p>Bell, Jordana; King's College London Faculty of Life Sciences and Medicine</p> <p>Amos, Gregory; National Institute for Biological Standards and Control</p> <p>Shankar-Hari, Manu; Guy's and Saint Thomas' Hospitals NHS Trust, Intensive Care Unit; King's College London Faculty of Life Sciences and Medicine, Division of Asthma, Allergy and Lung Biology</p> <p>Goodman, Anna; Guy's and Saint Thomas' NHS Foundation Trust, Centre for Clinical Infection and Diagnostics Research; King's College London Faculty of Life Sciences and Medicine</p> <p>Shawcross, Debbie ; King's College London Faculty of Life Sciences and Medicine, Hepatology</p> <p>Goldenberg, Simon; Guy's and Saint Thomas' NHS Foundation Trust, Centre for Clinical Infection and Diagnostics Research; King's College London Faculty of Life Sciences and Medicine</p> |
| <b>Primary Subject Heading</b>: | Infectious diseases                                                                                                                                                                                                                                                                                                                                                                                                                                                                                                                                                                                                                                                                                                                                                                                                                                                                                                                                                                                                                                                                                                                                                                                                                                                                                                                                                                                                                                                                  |
| Secondary Subject Heading:      | Gastroenterology and hepatology                                                                                                                                                                                                                                                                                                                                                                                                                                                                                                                                                                                                                                                                                                                                                                                                                                                                                                                                                                                                                                                                                                                                                                                                                                                                                                                                                                                                                                                      |
| Keywords:                       | BACTERIOLOGY, Microbiology < BASIC SCIENCES, Infection control < INFECTIOUS DISEASES                                                                                                                                                                                                                                                                                                                                                                                                                                                                                                                                                                                                                                                                                                                                                                                                                                                                                                                                                                                                                                                                                                                                                                                                                                                                                                                                                                                                 |
|                                 |                                                                                                                                                                                                                                                                                                                                                                                                                                                                                                                                                                                                                                                                                                                                                                                                                                                                                                                                                                                                                                                                                                                                                                                                                                                                                                                                                                                                                                                                                      |

1  
2  
3  
4  
5  
6  
7  
8  
9  
10  
11  
12  
13  
14  
15  
16  
17  
18  
19  
20  
21  
22  
23  
24  
25  
26  
27  
28  
29  
30  
31  
32  
33  
34  
35  
36  
37  
38  
39  
40  
41  
42  
43  
44  
45  
46  
47  
48  
49  
50  
51  
52  
53  
54  
55  
56  
57  
58  
59  
60

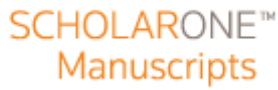



I, the Submitting Author has the right to grant and does grant on behalf of all authors of the Work (as defined in the below author licence), an exclusive licence and/or a non-exclusive licence for contributions from authors who are: i) UK Crown employees; ii) where BMJ has agreed a CC-BY licence shall apply, and/or iii) in accordance with the terms applicable for US Federal Government officers or employees acting as part of their official duties; on a worldwide, perpetual, irrevocable, royalty-free basis to BMJ Publishing Group Ltd ("BMJ") its licensees and where the relevant Journal is co-owned by BMJ to the co-owners of the Journal, to publish the Work in this journal and any other BMJ products and to exploit all rights, as set out in our [licence](#).

The Submitting Author accepts and understands that any supply made under these terms is made by BMJ to the Submitting Author unless you are acting as an employee on behalf of your employer or a postgraduate student of an affiliated institution which is paying any applicable article publishing charge ("APC") for Open Access articles. Where the Submitting Author wishes to make the Work available on an Open Access basis (and intends to pay the relevant APC), the terms of reuse of such Open Access shall be governed by a Creative Commons licence – details of these licences and which [Creative Commons](#) licence will apply to this Work are set out in our licence referred to above.

Other than as permitted in any relevant BMJ Author's Self Archiving Policies, I confirm this Work has not been accepted for publication elsewhere, is not being considered for publication elsewhere and does not duplicate material already published. I confirm all authors consent to publication of this Work and authorise the granting of this licence.



1  
2  
3 Protocol: A prospective, randomised placebo-controlled feasibility trial of Faecal microbiota  
4 Transplant to ERadicate gastrointestinal carriage of Antibiotic Resistant Organisms (FERARO)  
5  
6  
7  
8

9 Blair Merrick<sup>1</sup>, Emily Robinson<sup>2</sup>, Catey Bunce<sup>2</sup>, Liz Allen<sup>3,4</sup>, Karen Bisnauthsing<sup>1</sup>, Chi Chi  
10 Izundu<sup>5</sup>, Jordana Bell<sup>6</sup>, Gregory CA Amos<sup>7</sup>, Manu Shankar-Hari<sup>8</sup>, Anna Goodman<sup>1</sup>, Debbie L  
11 Shawcross<sup>9</sup>, Simon D Goldenberg<sup>1\*</sup>  
12  
13  
14

15 **Author affiliations**  
16

17 <sup>1</sup>Centre for Clinical Infection and Diagnostics Research, King's College, London and Guy's & St Thomas' NHS  
18 Foundation Trust, London, UK

19 <sup>2</sup>School of Population Health and Environmental Sciences, King's College London, UK

20 <sup>3</sup> Early Clinical Development Centre of Excellence, IQVIA, Reading UK

21 <sup>4</sup> Department of Pharmacy, Guy's and St Thomas' NHS Foundation Trust, London, UK

22 <sup>5</sup> Patient and Public Representative, London, UK

23 <sup>6</sup> Department of Twin Research and Genetic Epidemiology, King's College, London, UK

24 <sup>7</sup> National Institute for Biological Standards and Control, Potters Bar, Hertfordshire, UK

25 <sup>8</sup> Department of Infectious Diseases, School of Immunology and Microbial Sciences, Faculty of Life Sciences  
26 and Medicine, King's College, London and Guy's and St Thomas' NHS Foundation Trust, London, UK

27 <sup>9</sup> Institute of Liver Studies, Inflammation Biology, School of Immunology and Microbial Sciences, Faculty of Life  
28 Sciences and Medicine, King's College London, London, UK

29 \* Corresponding author  
30  
31

32 [Blair.merrick@gstt.nhs.uk](mailto:Blair.merrick@gstt.nhs.uk)

33 [Emily.robinson@kcl.ac.uk](mailto:Emily.robinson@kcl.ac.uk)

34 [Catey.bunce@kcl.ac.uk](mailto:Catey.bunce@kcl.ac.uk)

35 [Liz.allen@iqvia.com](mailto:Liz.allen@iqvia.com)

36 [Karen.bisnauthsing@gstt.nhs.uk](mailto:Karen.bisnauthsing@gstt.nhs.uk)

37 [Chi.chi.izundu@bbc.co.uk](mailto:Chi.chi.izundu@bbc.co.uk)

38 [Jordana.bell@kcl.ac.uk](mailto:Jordana.bell@kcl.ac.uk)

39 [Gregory.amos@nibsc.org](mailto:Gregory.amos@nibsc.org)

40 [Manu.shankar-hari@kcl.ac.uk](mailto:Manu.shankar-hari@kcl.ac.uk)

41 [Anna.goodman@gstt.nhs.uk](mailto:Anna.goodman@gstt.nhs.uk)

42 [Debbie.shawcross@kcl.ac.uk](mailto:Debbie.shawcross@kcl.ac.uk)

43 [Simon.goldenberg@gstt.nhs.uk](mailto:Simon.goldenberg@gstt.nhs.uk)  
44  
45  
46

47 **Keywords:** antimicrobial resistance, extended spectrum beta-lactamases, carbapenemase  
48 producing enterobacteriales, microbiome, faecal microbiota transplantation  
49

50 **Word count:** 4142  
51  
52  
53  
54  
55  
56  
57  
58  
59  
60

## **Abstract**

**Introduction:** antimicrobial resistance (AMR) is rising, largely due to the indiscriminate use of antimicrobials. The human gut is the largest reservoir of antibiotic resistant bacteria (ARB). Individuals colonised with ARB have the potential to spread these organisms both in the community and hospital settings. Infections with ARB such as extended spectrum beta-lactamase producing enterobacteriales (ESBL-E) and carbapenemase producing enterobacteriales (CPE) are more difficult to treat and are associated with an increased morbidity and mortality. Presently there is no effective decolonisation strategy for these ARB. Faecal microbiota transplant (FMT) has emerged as a potential strategy for decolonisation of ARB from the human gut, however there is significant uncertainty about the feasibility, effectiveness and safety of using this approach.

**Methods and analysis:** prospective, randomised, patient-blinded, placebo-controlled feasibility trial of FMT to eradicate gastrointestinal carriage of ARB. Eighty patients with a recent history of invasive infection secondary to ESBL-E or CPE and persistent gastrointestinal carriage will be randomised 1:1 to receive encapsulated FMT or placebo. The primary outcome measure is consent rate (as a proportion of patients who fulfil inclusion/ exclusion criteria); this will be used to determine if a substantive trial is feasible. Participants will be followed up at 1 week, 1 month, 3 months and 6 months and monitored for adverse events as well as gastrointestinal carriage rates of ARB after intervention.

**Ethics and dissemination:** research ethics approval was obtained by London - City & East Research Ethics Committee (ref 20/LO/0117). Trial results will be published in a peer-reviewed journal and presented at international conferences.

**Trial registration number:** ISRCTN registration number 34467677 and EudraCT number 2019-001618-41 protocol version 1.1. (dated 23/02/2020)

### **Strengths and limitations of this study**

- The randomised, placebo-controlled design will control for spontaneous loss of carriage of resistant organisms
- Qualitative data from participant focus groups will inform and influence a potential future trial
- This study will assess feasibility; however it is not statistically powered to assess clinically efficacy, which will need to be evaluated in a substantive trial
- Mechanistic outcomes using metagenomic, metabolomic and host immune analyses could provide insight into the mechanism of action of FMT in treatment responders
- The lack of investigator blinding, and the single centre design is a limitation

## **Introduction**

Antimicrobial resistance (AMR) in enterobacteriales is increasing, fuelled by the indiscriminate use of antimicrobials and inadequate infection control practices. Of greatest

1  
2  
3 concern are extended spectrum beta-lactamase producing (ESBL-E) and carbapenemase  
4 producing enterobacteriales (CPE). Rates of ESBL producing bacteria carriage in our local  
5 population are 9%, with the majority being CTX-M type (1). Rates of detection and infections  
6 caused by ESBL-E/ CRE are increasing nationally and globally (2, 3), resulting in a significant  
7 burden of attributable death and disability adjusted life years (4). Antimicrobial resistant  
8 bacteria (ARB) such as ESBL-E/ CPE have the capacity to spread between individuals and  
9 between organisms through horizontal gene transfer. These organisms have been  
10 responsible for several large and prolonged outbreaks worldwide (5-7). As well as increased  
11 morbidity and mortality, infection with resistant organisms is associated with prolonged  
12 hospital stay and increased healthcare costs (4, 8, 9). Hospitalised patients are particularly  
13 at risk of acquiring these organisms due to the treatments and procedures they receive,  
14 their comorbidities, and their high exposure to antimicrobials (5).

15  
16  
17  
18  
19 The microbiota of the human gut is a complex ecosystem and the largest reservoir of ARB  
20 (10, 11). A better understanding of the human microbiome has led to a new appreciation for  
21 the role indigenous microbes play in protecting us from invading exogenous pathogens. The  
22 role of the gut microbiota in defending the host against gastrointestinal pathogens was first  
23 described in a mouse model in which streptomycin administered orally to disrupt the gut  
24 microbiota resulted in increased rate of Salmonella enterica-related infections (12).  
25 Antimicrobials disrupt the balance of the delicate gut ecosystem, enabling colonisation by  
26 ESBL-E/ CPE and other potential pathogens. This is most strikingly evident in patients  
27 suffering from Clostridioides difficile infection (CDI), and the remarkable success of  
28 modulating this with faecal microbiota transplantation (FMT) (13, 14).

29  
30  
31  
32  
33 Attempts to control carriage of ARB in the gut using selective digestive decolonisation (SDD)  
34 are controversial, have not been widely adopted, and is not recommended by expert groups  
35 (15). Loss of ARB colonisation has been observed in a number of patients when using FMT to  
36 treat recurrent CDI (16). However, these reports are nearly all case series which are  
37 uncontrolled and do not account for spontaneous loss of carriage, which can occur in up to  
38 50% of patients following hospital discharge (17).

39  
40  
41 The only published randomised trial of FMT to eradicate gastrointestinal carriage of ESBL-E  
42 and CPE was conducted in four academic centres in Geneva, Paris, Utrecht and Tel Aviv (18).  
43 Patients were randomised in a 1:1 ratio to a five-day course of colistin and neomycin  
44 followed by FMT or no intervention. The primary outcome measure was culture of ESBL-E /  
45 CPE from stool 35-48 days following randomisation, which was achieved for 41% (9/22) of  
46 patients in the intervention arm vs. 29% (5/17) in the control arm. Although the odds ratio  
47 for decolonisation success for FMT was 1.7 (95% confidence interval 0.4-6.4), this was not  
48 statistically significant, leaving the authors to conclude that the results do not support the  
49 routine use of FMT for decolonisation. Although the study was multicentre and included a  
50 control group to account for spontaneous loss of carriage, there are several limitations with  
51 the design and conduct, making it difficult to draw firm conclusions. Firstly, although  
52 designed as a superiority trial with a sample size calculation of 32 in each group, only 39  
53 (61%) patients in total were randomised (due to recruitment problems). Secondly, patients  
54 in the intervention arm received five days of colistin and neomycin in addition to FMT,  
55 whereas the controls received no intervention. Thus, it is impossible to determine whether  
56 the results were due to the antibiotics (likely to have a profound effect on the gut flora) vs.  
57  
58  
59  
60

1  
2  
3 FMT. Thirdly, the methods of administration of FMT varied according to recruiting site;  
4 capsules were administered in two centres (16 patients), whilst two used nasogastric  
5 administration (6 patients). The capsules (15 administered each day over two days) were  
6 produced from one donation derived from 15-30g faeces. The nasogastric preparation was  
7 derived from 40g. There is evidence in the context of recurrent CDI that FMT preparations  
8 made with less than 50g faeces result in poorer outcomes than those made with more than  
9 this amount (19). Thus, a question exists over whether the patients were under dosed, and  
10 if repeated administrations (perhaps using different donors) might be more effective. Lastly,  
11 the study was not placebo controlled or blinded, although the primary outcome of stool  
12 culture at one month is fairly objective, there is the possibility of introducing bias in an  
13 investigator who is aware of the allocation.  
14  
15  
16

17  
18 Due to the limitations of the above study, the lack of other rigorously conducted, well  
19 controlled studies, and the considerable doubt that sufficient patients would be willing to  
20 participate in research of this type, we designed a feasibility study to address some of the  
21 outstanding questions.  
22  
23

## 24 **Methods and analysis**

### 25 **Primary objectives**

26 The primary objective of this study is to determine the feasibility and acceptability of  
27 administering encapsulated FMT to participants colonised with ESBL-E / CPE. This will be  
28 used to determine if a substantive trial is feasible.  
29  
30  
31

### 32 **Primary endpoints**

33 The primary outcome measure is consent rate (as a proportion of patients who fulfil  
34 inclusion/ exclusion criteria). The success criteria for the primary endpoint are stratified. If  
35 <15% is achieved, progression to a substantive trial will not be deemed feasible. If 15-39%,  
36 progression to a substantive trial will be deemed feasible with protocol modifications and  
37 clearly defined stop/go criteria. An overall consent rate of >40% will be taken as indicating a  
38 substantive trial is feasible.  
39  
40  
41

### 42 **Secondary objectives**

43 The secondary objectives are to assess other feasibility aspects of conducting a substantive  
44 trial, to evaluate the safety and tolerability of FMT in this patient population, and to provide  
45 early evidence of efficacy. These measures should inform a future trial, such as determining  
46 the primary (efficacy) outcome and sample size, if progression criteria are met. A full list of  
47 criteria for progression to a substantive trial are details in Table 1 of supplementary file.  
48  
49  
50

### 51 **Secondary feasibility endpoints**

- 52 • Proportion of patients fulfilling inclusion / exclusion criteria
- 53 • Proportion of patients receiving FMT / placebo (as a % of those consenting)
- 54 • Proportion of patients returning for follow up visits (face to face visit at Day 40)
- 55 • Proportion of patients providing follow up stool samples (Days 10, 40, 100 and 190)
- 56 • Ability to recruit sufficient healthy donors to manufacture all FMT doses to meet demands  
57 of this and a future substantive RCT. Assessed by delay in dosing patients (measured in  
58 days)  
59  
60

**Additional feasibility assessments will include:**

- Collection of data that may be used in estimating of costs/resources needed to provide FMT in the NHS.
- An embedded qualitative study to explore views and experiences of research participants.

**Secondary efficacy endpoints**

- Gastrointestinal carriage of CRE / ESBL (detected / not detected) by stool culture over time (days 10, 40, 100 and 190)
- Gastrointestinal carriage of CRE / ESBL (detected / not detected) by multiplex PCR over time (days 10, 40, 100 and 190)

**Secondary safety and tolerability endpoints**

- proportion of patients experiencing reflux following administration of FMT
- Proportion of patients suffering intolerable (resulting in withdrawal from the study) gastrointestinal side effects (including diarrhoea, constipation, abdominal pain, flatulence and bloating). This will be assessed by direct questioning and completion of a short patient questionnaire.
- identification of unanticipated harms involved with administration of FMT.
- occurrence of any adverse event / serious adverse event

**Exploratory endpoints/outcomes**

The following exploratory / mechanistic outcomes will be measured:

- Changes in the gut microbiome induced by capsulized FMT as measured by comparing between treatment groups change (relative to baseline) in;
  - the proportion and relative abundance of bacterial taxa over time (days 10, 40, 100 and 190)
  - the change in diversity of the microbiome over time (days 10, 40, 100 and 190) measured using Shannon and Simpson indices
  - antibiotic resistance genes carriage over time (days 10, 40, 100 and 190)
- Changes in the gut metabolome induced by capsulized FMT (using Nuclear Magnetic Resonance (NMR) spectroscopy). Measured at days 10, 40, 100 and 190.
- Host immune response T and B cell) as measured by comparing participants prior to and day 40, as well as donors who will act as controls.

**Trial design**

Randomised control participant-blinded, single-centre, feasibility trial with two parallel groups (FMT capsules and matched placebo). Eighty patients will be randomised 1:1 (40 will receive FMT capsules and 40 placebo) from eligible patients identified from Guy's and St Thomas' hospitals (figure 1 & table 1).

**Table 1:** Participant inclusion/exclusion criteria**Inclusion criteria**

To be eligible for enrolment, a participant must meet all the following criteria before undergoing any study-related procedures:

- Adult patients (age 18 years or older at time of consent) **AND**
- Current/ previous patient at Guy's and St Thomas' NHS Foundation Trust **AND**
- Ability to understand the purpose, potential benefits and risks of the study and capable of giving informed consent. The participant must be able to provide written informed consent **AND**
- Documented gastrointestinal carriage of ESBL-E or CPE (stool sample) in the 21 days prior to consent **AND**
- Symptomatic infection with the same target organism of interest in preceding 6 months (this needs to be microbiologically confirmed but is not restricted to any particular body site e.g. could be urinary tract infection, intra-abdominal infection, blood stream infection etc).

**Exclusion criteria**

- Pregnancy or planned pregnancy
- Breastfeeding
- Severe or life-threatening food allergy
- Allergy or other contraindication to omeprazole, IMP or placebo ingredients
- Treatment with systemic antibiotic on the day of and day prior to 1<sup>st</sup> IMP/placebo dosing to the end of the dosing period
- Treatment with pre or probiotics in the 4 weeks prior to randomisation and for the duration of the study
- Severe immunodeficiency:
  - systemic chemotherapy <30 days from baseline or planned chemotherapy within the upcoming 6 months
  - Known HIV infection with CD4 count <250 cells/uL
  - Known neutropenia with absolute neutrophils <1.0x10<sup>9</sup>
  - Prolonged treatment with corticosteroids (equivalent to prednisone >60mg daily for > 30 days) within 8 weeks of randomisation
- Life expectancy <6 months
- Swallowing disorder, oral-motor dyscoordination or likely inability/unwillingness to ingest study medication
- Patients who have received another investigational drug or device within 4 months prior to randomisation
- Any condition or circumstance, in the opinion of the investigator, that would compromise the safety of the patient or the quality of the study data

**Patient and public involvement**

Patients and the public have identified antimicrobial resistance as a research priority and were involved in identifying the research question and providing feedback on the grant application.

1  
2  
3 A patient representative has been appointed to the Trial Steering Committee (TSC), and has  
4 advised on the design of the research, the protocol and all patient facing materials. The patient  
5 representative will also be involved in dissemination of the study findings. As the acceptability  
6 of FMT in this setting is a key research question we will invite up to eight patients to participate  
7 in focus groups. The aim of the group will be to understand their experience in participation in  
8 the study and will focus on acceptability, barriers to participation and improvements that could  
9 be made to any resulting substantive trial.  
10  
11

### 12 13 **Patient population**

14 Participants will be recruited from Guy's and St Thomas' NHS Foundation Trust, a 1200 bed  
15 academic centre in central London. It is anticipated that most patients will already be  
16 admitted to the hospital as part of standard of care treatment, thus, most activities will take  
17 place on the ward or clinical area that the patient is already located. Where this is not the  
18 case, participants will be invited to attend the infection clinical room on an outpatient basis.  
19  
20

### 21 22 **Consent**

23 Informed consent (for both healthy donors and patient-recipients) will be obtained prior to  
24 any trial related activities, including screening for eligibility. Potential participants will be  
25 given the participant information sheet (PIS) and allowed enough time to read thoroughly  
26 and discuss with others outside of the study team (e.g. family, friends, general practitioner)  
27 (see online supplementary file table 2). Participants are free to withdraw from the trial at  
28 any time without giving reasons. Data and samples collected up to the point of withdrawal  
29 will only be used after withdrawal if the participant consented for this. Patients who lack  
30 capacity will not be enrolled in this study. Where a participant consents but later becomes  
31 incapacitated, the original consent given endures the loss of capacity, providing that the  
32 trial has not significantly altered.  
33  
34  
35

### 36 37 **Randomisation**

38 The randomisation schedule will be generated using a validated online randomisation  
39 programme, hosted by King's Clinical Trials Unit. The method of randomisation will be block  
40 randomisation with randomly varying block sizes. As this is a single centre study,  
41 randomisation does not need to be stratified. Participants will be allocated treatment as  
42 close as possible to receiving it.  
43  
44

### 45 46 **Study intervention**

47 FMT for this trial will be prepared in a lyophilised, encapsulated form in accordance with  
48 Good Manufacturing Practice (GMP) principles and under manufacturing authorisation for  
49 an Investigational Medicinal Product (IMP) from the Medicines and Healthcare Products  
50 Regulatory Agency (MHRA). Our centre has recently provided FMT for a CTIMP for cirrhosis  
51 and this follows similar processes (20). Healthy donor inclusion and exclusion criteria and  
52 screening and eligibility questionnaire are described in Tables 3 and 4 of the supplementary  
53 file.  
54  
55

56 The product contains 0.9% sodium chloride and 5% trehalose (cryoprotectant) as excipients.  
57 A minimum of 80g faeces from each donor will be used to manufacture one batch of five  
58 capsules. Following lyophilisation, the material will be encapsulated in five size 0 delayed  
59 release methylcellulose capsules (DRcaps™, Capsugel®, Livingston, UK). Placebo capsules  
60

1  
2  
3 will contain microcrystalline cellulose. The capsules for the FMT and placebo will be  
4 identical in appearance. The capsules are coloured Swedish orange, resulting in an opaque  
5 appearance through which the contents cannot be seen.  
6  
7

8 FMT donors are carefully screened healthy volunteers with a body mass index between 18-  
9 30. Donors undergo questionnaire screening for risk factors and testing for a range of  
10 infectious agents as previously described and in accordance with national guidelines (see  
11 appendix A for full details) (21). FMT material is traceable from donor to recipient. Aliquots  
12 of donor stool will be kept for 30 years to allow for future testing if required.  
13  
14

15 At baseline participants will have their medication history recorded, including over the  
16 counter preparations and supplements as well as pre/probiotics. Vital signs, height and  
17 weight, and baseline blood biochemistry and haematology will be collected. Additionally, a  
18 serum sample will be stored to allow future testing in the event of a possible transmission  
19 event. If female and of child-bearing age a urinary pregnancy test will be performed. An EQ-  
20 5D questionnaire will also be administered.  
21  
22

23 Encapsulated FMT (IMP) and placebo will be dispensed by study staff to trial participants  
24 over three consecutive days (or over five days if over a weekend). Patients will be fasted for  
25 4 hours and be pre-treated with omeprazole on the morning on the FMT (40mg on first  
26 dosing day and 20mg on the two subsequent dosing days).  
27  
28

29 It is anticipated that most patients will remain an inpatient for the duration of treatment. If  
30 they have been discharged in the interim provision will be made for them to attend for  
31 treatment as an outpatient.  
32  
33

### 34 **Evaluations during and after treatment**

35 Follow up events will be scheduled for all participants at 1 week, 1 month, 3 months and 6  
36 months after end of therapy. If an outpatient, the visits at 1 week, 3 months and 6 months  
37 will be conducted by telephone, with the participant returning a stool sample by post. The  
38 follow-up at 1 month will be face to face and will include a blood sample for immune  
39 analyses. All visits will involve completion of an EQ-5D questionnaire (see figure 2 for  
40 additional details).  
41  
42

### 43 **Sample analyses**

44 Stool samples will be analysed for the presence of ESBL-E/ CPE using culture based  
45 (chromogenic agar with species identification using MALDI-ToF mass spectrometry and  
46 phenotypic antimicrobial susceptibility testing) and molecular techniques (multiplex PCR  
47 panel for 16 ESBL/ CPE resistance genes).  
48  
49  
50

### 51 **Follow-up**

52 If a participant fails to present for follow up assessment, all attempts to contact the  
53 participant and information received during contact attempts will be documented in the  
54 participant's medical record. In any circumstance, every effort will be made to contact the  
55 participant and document outcome (i.e. three documented contact attempts via phone  
56 calls, on separate occasions will be made to locate or contact the participant, and/or  
57 determine health status). Stool samples will be stored for further follow-on analysis,  
58 including metagenomics and metabolomics profiling.  
59  
60



### **Qualitative study**

A qualitative study of participant's experiences will be undertaken and comprises a focus group interview with a minimum of eight participants. Ideally the group will include at least two patients who were approached but did not agree to participate. The aim of these discussions is to identify facilitators and barriers to delivering the trial, and whether there are any aspects of the trial that should be changed. The interviews will be semi-structured and recorded to aid writing up the study report. Objectives of the focus group will include; identifying ways of increasing recruitment and retention; identifying ways of broadening participation in the trial to improve diversity of population; improving understanding of how participants join trials and experience of participation; measuring reasons for non-adherence to the trial medication; exploring stakeholders' views of acceptability of the trial design; strengthening the ethical conduct of the trial, for example, informed consent procedures; addressing any local issues which may impact on the feasibility of a substantive trial.

### **Statistical analysis**

#### **Sample size**

As this is a feasibility study, significance tests between or within groups will not be performed for the study's primary and secondary endpoints, therefore a power calculation has not been performed. For feasibility and pilot studies, sample sizes between 24 and 50 have been recommended to estimate a chosen parameter (22, 23). We have chosen a 1:1 treatment to placebo ratio, therefore a total sample size of 80 would be enough to estimate the standard deviation of the outcome in 40 treated patients, allowing for some loss to follow-up. We will also be able to estimate our expected recruitment rate of 40% (95% CI: 33-47) if we approach around 200 eligible patients.

#### **Data synthesis, analysis and presentation**

A Statistical Analysis Plan will be written by the trial statistician and signed off prior to database lock. The study will be reported in accordance with the CONSORT extension for pilot and feasibility studies.

The proportion of patients who accept the offer of randomisation will be reported with 95% confidence intervals computed by the exact binomial method. No statistical tests for significant differences between treatment groups will be performed. In addition to summary statistics of the secondary outcomes, all harms and withdrawals will be reported with 95% confidence intervals. Patients will be analysed in the groups to which they are randomised in accordance with intent to treat principals.

The protocol has been designed to place minimal burden upon patients and case report forms are only capturing essential data. It is inevitable that there may be some missing data, which will be reported by treatment group with reasons for missingness described, where possible. Since this is a feasibility study, we do not plan to impute missing data.

#### **Statistical software**

1  
2  
3 All statistical analysis will be conducted using Stata version 15.0 or above (StatCorp, Texas).  
4  
5

## 6 **Trial monitoring groups**

### 8 **Trial Management Group (TMG)**

9 Comprises the chief investigator (CI), trial statistician, trial staff and other lead clinical and  
10 non-clinical co-investigators and co-applicants. The TMG are responsible for the day-to-day  
11 management of the trial and to ensure all practical details of the trial are progressing and  
12 working well. The TMG will monitor all aspects of the conduct and progress of the trial,  
13 ensuring that the protocol is adhered to and take appropriate action to safeguard  
14 participants and the quality of the trial itself. The TMG will be responsible for drafting of the  
15 final report and submission for publication.  
16  
17  
18

### 19 **Trial Steering Committee (TSC)**

20 A Trial Steering Committee (TSC) will be convened with membership nominated by the CI in  
21 partnership with the sponsor. The role of the TSC is to provide overall supervision for the  
22 trial on behalf of the sponsor and funder and to ensure that the project is conducted to the  
23 rigorous standards set out in the Department of Health and Social Care's Research  
24 Governance Framework for Health and Social Care and the Guidelines for Good Clinical  
25 Practice. The committee Chair will be independent of the study. The committee will also  
26 comprise four other independent members (Consultant Microbiologists or  
27 Gastroenterologists) a patient/public representative, and an independent statistician.  
28 The TSC will take responsibility for monitoring data and making recommendations to the  
29 TMG on whether there are any ethical or safety reasons why the trial should not continue. A  
30 separate Data Monitoring and Ethics Committee (DMEC) will not be established as this is a  
31 single centre feasibility trial with a relatively small number of patients using an established  
32 IMP with a relatively well described safety profile.  
33  
34  
35  
36  
37

### 38 **Ethics and dissemination**

39 Research ethics approval was obtained by London - City & East Research Ethics Committee  
40 (ref. 20/LO/0117). Trial results will be published in a peer-reviewed journal and presented at  
41 international conferences.  
42  
43

### 44 **Discussion**

45  
46 Several case reports and one randomised controlled trial of ARB decolonisation using FMT  
47 are summarised in four systematic reviews (16, 24-26). Most studies were case reports or  
48 case series which did not control for spontaneous loss of ARB carriage. This is important  
49 since it may be significant and may lead to overestimation of the effectiveness of FMT in  
50 achieving decolonisation. In a recent study conducted at Central Manchester Foundation  
51 Trust during 2016/17 only 17.1% of patients who were previously known to be colonised  
52 with CRE had it detected on readmission to the hospital (27). Therefore, the use of a  
53 placebo in this trial is justified and crucial to control for spontaneous loss of carriage.  
54  
55  
56

57 Capsule administration has been selected following consultation with patient groups. It is  
58 more acceptable and cost effective than other methods of administration such as via  
59 nasogastric tube.  
60

1  
2  
3  
4  
5 Although the underlying mechanism of action of FMT is not fully elucidated, the use of three  
6 different donors is justified as it likely increases the bacterial diversity in the administered  
7 IMP, with the hope that this will engraft in the recipient. The previous study using a single  
8 donor resulted in an odds ratio for decolonisation success of 1.7 (95% CI 0.4-6.4). We  
9 hypothesize that using multiple donors at three dosing points will result in a higher rate of  
10 decolonisation. This is also based on experience of using FMT to treat patients with  
11 ulcerative colitis, where multiple donors are used in prolonged treatment intervals of up to  
12 six weeks (28-31).  
13  
14

15 The overall aim of this programme of work (which would proceed to a future substantive  
16 RCT if feasible) is to eradicate or suppress ESBL-E / CRE without resorting to the use of  
17 antibiotics. If that can be achieved, then the risk of an invasive infection with ARB in these  
18 patients could be significantly reduced.  
19  
20

#### 21 **Acknowledgements**

22 EJR receives salary support from the NIHR Biomedical Research Centre based at Guy's and St Thomas' NHS  
23 Foundation Trust and King's College, London  
24

#### 25 **Collaborators**

26 Annapurna Vyakarnam, David Moyes, James Mason  
27

#### 28 **Contributors**

29 SDG and BM conceived and designed the trial, and drafted the manuscript.  
30 EJR and CB designed the statistical aspects of the study.  
31 MSH designed the exploratory immunology aspects of the study.  
32 GCAA and JB designed exploratory microbiome aspects of the study.  
33 LA provided expert advice on regulatory and compliance aspects of the study.  
34 DLS is Chair of the Trial Steering Committee and provided expert advice.  
35 CCI provided input from the patient and public perspective.  
36 KB provided advice on sample collection and reviewed all participant materials.  
37 AG provided general expert advice on the design and conduct of the study.  
38 All authors reviewed and approved the final manuscript.  
39

#### 40 **Sponsor**

41 The study sponsor is Guy's and St Thomas' NHS Foundation Trust, Great Maze Pond, London SE1 9RT. The  
42 sponsor had no role in the design of this study and will not have any role during its execution, analyses,  
43 interpretation of the data, or decision to submit results.  
44

#### 45 **Funding**

46 This independent research is supported by the National Institute for Health Research (NIHR) under its  
47 Research for Patient Benefit (RfPB) Programme (grant reference number PB-PG-0418-20007). The funder had  
48 no role in the design of this study and will not have any role during its execution, analyses, interpretation of  
49 the data, or decision to submit results.  
50

#### 51 **Competing interests**

52 SDG has received personal fees from Astellas, Enterobiotix, Menarini, MSD, Pfizer and Shionogi.  
53 DLS has undertaken paid consultancy for Norgine Ltd, Shionogi and Kaleido Biosciences and paid lectures for  
54 Falk Pharma, Norgine Ltd and Alfa Sigma  
55 All other authors report no competing interests.  
56  
57

#### 58 **Patient consent for publication**

59 Not required.  
60

**Ethics approval**

Research ethics approval was given by London - City & East Research Ethics Committee (ref. 20/LO/0117).

For peer review only

## References

1. J. A. Otter, A. Natale, R. Batra, O. Tosas Auguet, E. Dyakova, S. D. Goldenberg, et al. Individual- and community-level risk factors for ESBL Enterobacteriaceae colonization identified by universal admission screening in London. *Clin Microbiol Infect*. 2019;25(10):1259-65.
2. Public Health England. English Surveillance Programme for Antimicrobial Utilisation and Resistance (ESPAUR) Report. 2019.
3. V. Gupta, G. Ye, M. Olesky, K. Lawrence, J. Murray, K. Yu. Trends in resistant Enterobacteriaceae and Acinetobacter species in hospitalized patients in the United States: 2013-2017. *BMC Infect Dis*. 2019;19(1):742.
4. A. Cassini, L. D. Hogberg, D. Plachouras, A. Quattrocchi, A. Hoxha, G. S. Simonsen, et al. Attributable deaths and disability-adjusted life-years caused by infections with antibiotic-resistant bacteria in the EU and the European Economic Area in 2015: a population-level modelling analysis. *Lancet Infect Dis*. 2019;19(1):56-66.
5. K. van Loon, A. F. Voor In 't Holt, M. C. Vos. A Systematic Review and Meta-analyses of the Clinical Epidemiology of Carbapenem-Resistant Enterobacteriaceae. *Antimicrob Agents Chemother*. 2018;62(1).
6. L. Tavošchi, S. Forni, A. Porretta, L. Righi, F. Pieralli, F. Menichetti, et al. Prolonged outbreak of New Delhi metallo-beta-lactamase-producing carbapenem-resistant Enterobacteriales (NDM-CRE), Tuscany, Italy, 2018 to 2019. *Euro Surveill*. 2020;25(6).
7. V. Decraene, H. T. T. Phan, R. George, D. H. Wyllie, O. Akinremi, Z. Aiken, et al. A Large, Refractory Nosocomial Outbreak of *Klebsiella pneumoniae* Carbapenemase-Producing *Escherichia coli* Demonstrates Carbapenemase Gene Outbreaks Involving Sink Sites Require Novel Approaches to Infection Control. *Antimicrob Agents Chemother*. 2018;62(12).
8. H. Suzuki, E. N. Perencevich, D. J. Livorsi, B. Alexander, B. F. Beck, K. K. Richardson, et al. Attributable mortality due to fluoroquinolone and extended-spectrum cephalosporin resistance in hospital-onset *Escherichia coli* and *Klebsiella* spp bacteremia: A matched cohort study in 129 Veterans Health Administration medical centers. *Infect Control Hosp Epidemiol*. 2019;40(8):928-31.
9. C. E. French, C. Coope, L. Conway, J. P. Higgins, J. McCulloch, G. Okoli, et al. Control of carbapenemase-producing Enterobacteriaceae outbreaks in acute settings: an evidence review. *J Hosp Infect*. 2017;95(1):3-45.
10. C. J. Donskey. The role of the intestinal tract as a reservoir and source for transmission of nosocomial pathogens. *Clin Infect Dis*. 2004;39(2):219-26.
11. J. Carlet. The gut is the epicentre of antibiotic resistance. *Antimicrob Resist Infect Control*. 2012;1(1):39.
12. M. Bohnhoff, C. P. Miller, W. R. Martin. Resistance of the Mouse's Intestinal Tract to Experimental *Salmonella* Infection. Factors Which Interfere with the Initiation of Infection by Oral Inoculation. *J Exp Med*. 1964;120:805-16.
13. E. van Nood, M. G. Dijkgraaf, J. J. Keller. Duodenal infusion of feces for recurrent *Clostridium difficile*. *N Engl J Med*. 2013;368(22):2145.
14. P. Moayyedi, Y. Yuan, H. Baharath, A. C. Ford. Faecal microbiota transplantation for *Clostridium difficile*-associated diarrhoea: a systematic review of randomised controlled trials. *Med J Aust*. 2017;207(4):166-72.

15. E. Tacconelli, F. Mazzaferri, A. M. de Smet, D. Bragantini, P. Eggimann, B. D. Huttner, et al. ESCMID-EUCIC clinical guidelines on decolonization of multidrug-resistant Gram-negative bacteria carriers. *Clin Microbiol Infect.* 2019;25(7):807-17.
16. S. Saha, R. Tariq, P. K. Tosh, D. S. Pardi, S. Khanna. Faecal microbiota transplantation for eradicating carriage of multidrug-resistant organisms: a systematic review. *Clin Microbiol Infect.* 2019;25(8):958-63.
17. J. P. Vink, J. A. Otter, J. D. Edgeworth. Carbapenemase-producing Enterobacteriaceae - once positive always positive? *Curr Opin Gastroenterol.* 2020;36(1):9-16.
18. B. D. Huttner, V. de Lastours, M. Wassenberg, N. Maharshak, A. Mauris, T. Galperine, et al. A 5-day course of oral antibiotics followed by faecal transplantation to eradicate carriage of multidrug-resistant Enterobacteriaceae: a randomized clinical trial. *Clin Microbiol Infect.* 2019;25(7):830-8.
19. E. Gough, H. Shaikh, A. R. Manges. Systematic review of intestinal microbiota transplantation (fecal bacteriotherapy) for recurrent *Clostridium difficile* infection. *Clin Infect Dis.* 2011;53(10):994-1002.
20. C. A. Woodhouse, V. C. Patel, S. Goldenberg, A. Sanchez-Fueyo, L. China, A. O'Brien, et al. PROFIT, a PROspective, randomised placebo controlled feasibility trial of Faecal microbiota Transplantation in cirrhosis: study protocol for a single-blinded trial. *BMJ Open.* 2019;9(2):e023518.
21. S. D. Goldenberg, R. Batra, I. Beales, J. L. Digby-Bell, P. M. Irving, L. Kellingray, et al. Comparison of Different Strategies for Providing Fecal Microbiota Transplantation to Treat Patients with Recurrent *Clostridium difficile* Infection in Two English Hospitals: A Review. *Infect Dis Ther.* 2018;7(1):71-86.
22. S. A. Julious. Two-sided confidence intervals for the single proportion: comparison of seven methods by Robert G. Newcombe, *Statistics in Medicine* 1998; 17:857-872. *Stat Med.* 2005;24(21):3383-4.
23. J. Sim, M. Lewis. The size of a pilot study for a clinical trial should be calculated in relation to considerations of precision and efficiency. *J Clin Epidemiol.* 2012;65(3):301-8.
24. M. H. Woodworth, M. K. Hayden, V. B. Young, J. H. Kwon. The Role of Fecal Microbiota Transplantation in Reducing Intestinal Colonization With Antibiotic-Resistant Organisms: The Current Landscape and Future Directions. *Open Forum Infect Dis.* 2019;6(7).
25. V. Tavoukjian. Faecal microbiota transplantation for the decolonization of antibiotic-resistant bacteria in the gut: a systematic review and meta-analysis. *J Hosp Infect.* 2019;102(2):174-88.
26. B. Davido, R. Batista, A. Dinh, P. de Truchis, E. M. Terveer, B. Roberts, et al. Fifty shades of graft: How to improve the efficacy of faecal microbiota transplantation for decolonization of antibiotic-resistant bacteria. *Int J Antimicrob Agents.* 2019;53(5):553-6.
27. A. Tucker, R. George, W. Welfare, P. Cleary, J. Cawthorne, A. Dodgson. Screening for carbapenemase-producing Enterobacteriaceae in previous carriers readmitted to hospital: evaluation of a change in screening policy. *J Hosp Infect.* 2019;103(2):156-9.
28. P. Moayyedi, M. G. Surette, P. T. Kim, J. Libertucci, M. Wolfe, C. Onischi, et al. Fecal Microbiota Transplantation Induces Remission in Patients With Active Ulcerative Colitis in a Randomized Controlled Trial. *Gastroenterology.* 2015;149(1):102-9 e6.
29. N. G. Rossen, S. Fuentes, M. J. van der Spek, J. G. Tijssen, J. H. Hartman, A. Duflou, et al. Findings From a Randomized Controlled Trial of Fecal Transplantation for Patients With Ulcerative Colitis. *Gastroenterology.* 2015;149(1):110-8 e4.

- 1  
2  
3 30. S. Paramsothy, M. A. Kamm, N. O. Kaakoush, A. J. Walsh, J. van den Bogaerde, D.  
4 Samuel, et al. Multidonor intensive faecal microbiota transplantation for active ulcerative  
5 colitis: a randomised placebo-controlled trial. *Lancet*. 2017;389(10075):1218-28.  
6  
7 31. S. P. Costello, O. Waters, R. V. Bryant, R. Katsikeros, J. Makanyanga, M. Schoeman, et  
8 al. Short Duration, Low Intensity, Pooled Fecal Microbiota Transplantation Induces  
9 Remission in Patients with Mild-Moderately Active Ulcerative Colitis: A Randomised  
10 Controlled Trial. *Gastroenterology*. 2017;152(5):S198-S9.  
11  
12  
13

14 Figure legends:

15  
16 Table 1. Participant inclusion/exclusion criteria

17 Figure 1. CONSORT flow diagram

18 Figure 2. Intervention and follow up  
19  
20  
21  
22  
23  
24  
25  
26  
27  
28  
29  
30  
31  
32  
33  
34  
35  
36  
37  
38  
39  
40  
41  
42  
43  
44  
45  
46  
47  
48  
49  
50  
51  
52  
53  
54  
55  
56  
57  
58  
59  
60

Figure 1: CONSORT flow diagram

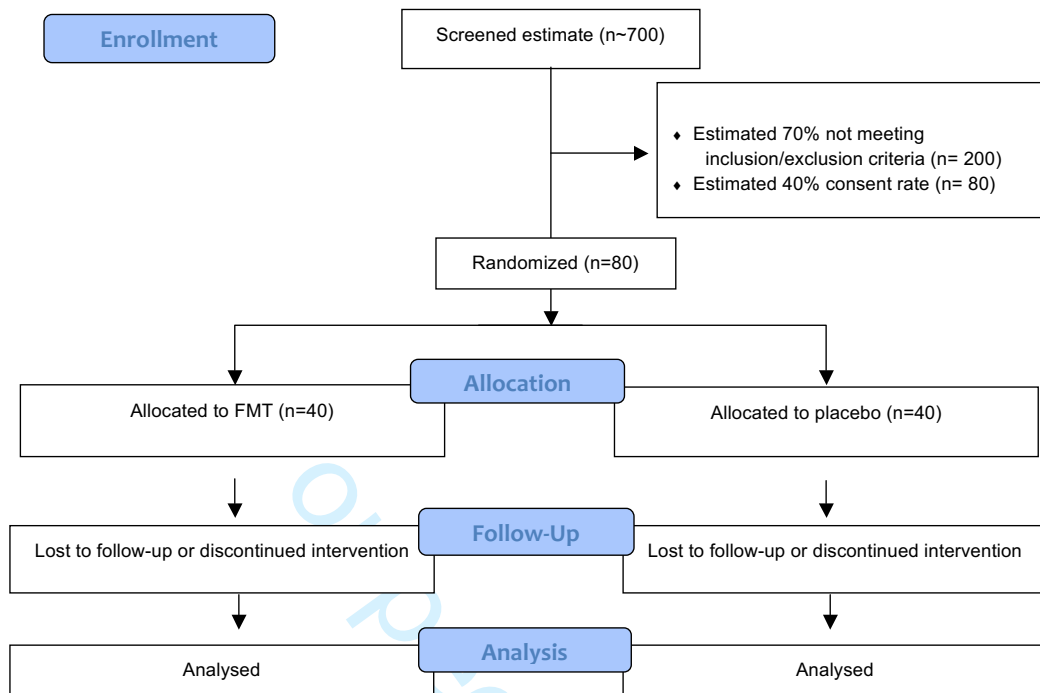



1  
2  
3  
4  
5  
6  
7  
8  
9  
10  
11  
12  
13  
14  
15  
16  
17  
18  
19  
20  
21  
22  
23  
24  
25  
26  
27  
28  
29  
30  
31  
32  
33  
34  
35  
36  
37  
38  
39  
40  
41  
42  
43  
44  
45  
46  
47  
48  
49  
50  
51  
52  
53  
54  
55  
56  
57  
58  
59  
60

**Figure 2: Intervention and follow-up**

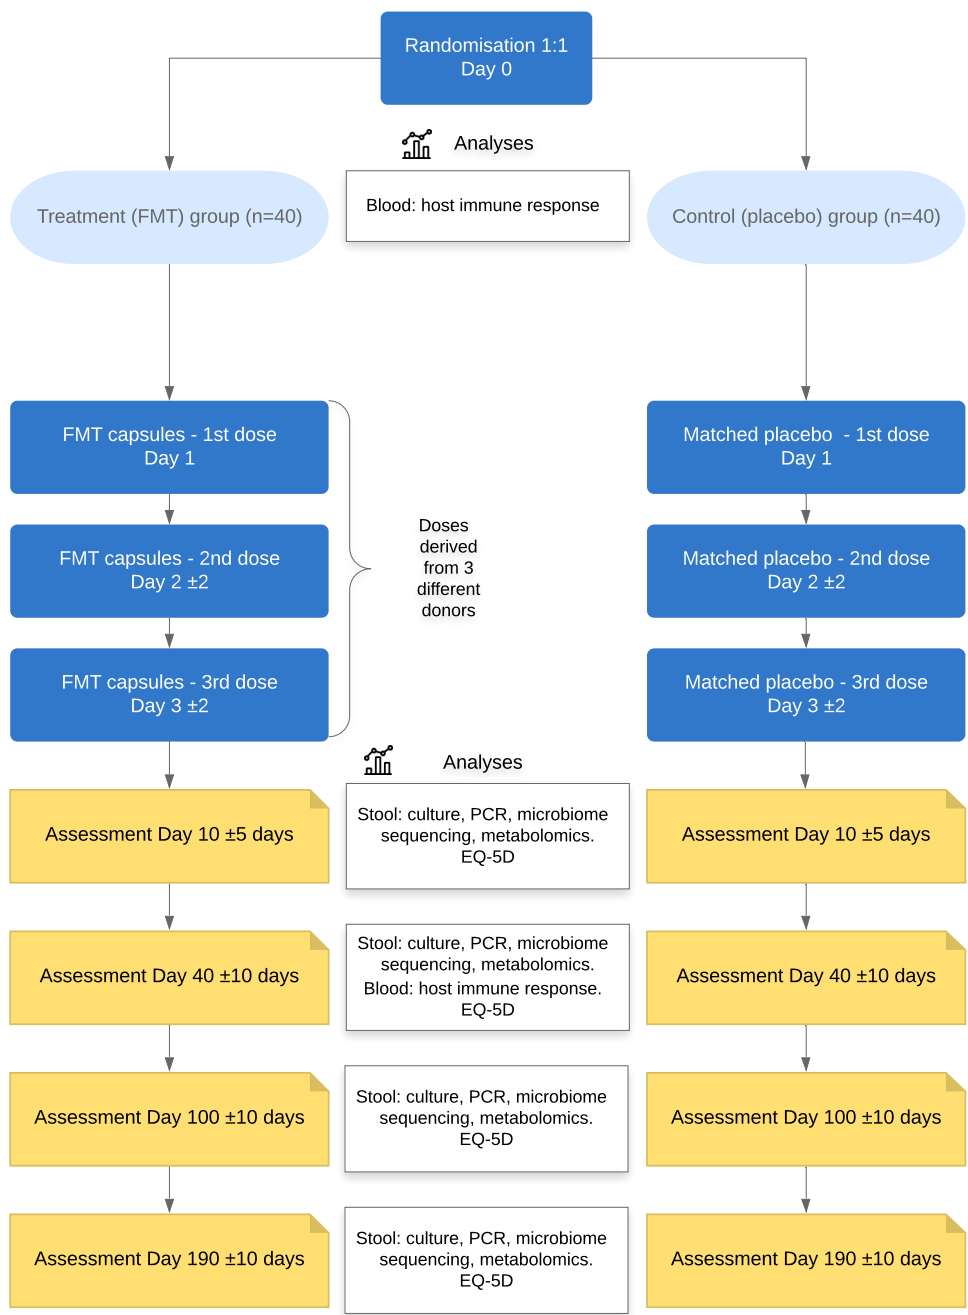

**Supplementary file S1.**

FERARO: A prospective, randomised placebo-controlled feasibility trial of Faecal microbiota Transplant to ERadicate gastrointestinal carriage of Antibiotic Resistant Organisms: study protocol for single-blinded trial

Table 1. Criteria for progression to a substantive trial

| Criteria                                                                                                                | Stop – substantive trial not feasible | Continue with protocol modifications, close monitoring and clearly defined stop/go points | Continue without modification – feasible as is |
|-------------------------------------------------------------------------------------------------------------------------|---------------------------------------|-------------------------------------------------------------------------------------------|------------------------------------------------|
| <b>Hard Feasibility Criteria</b><br>Used to determine progression to a substantive trial                                |                                       |                                                                                           |                                                |
| Consent rate (% of patients who fulfil eligibility criteria)                                                            | <15%                                  | 15-39%                                                                                    | >40%                                           |
| <b>Soft Feasibility Criteria</b><br>Taken into consideration in determining progression to a substantive trial          |                                       |                                                                                           |                                                |
| Proportion of patients fulfilling eligibility criteria                                                                  | <10%                                  | 10-29%                                                                                    | >30%                                           |
| % of patients receiving IMP/placebo (as % of those consenting) and compliant will all doses on all three days           | <50%                                  | 50-75%                                                                                    | >75%                                           |
| % of patients returning for follow up visit (Day 40)                                                                    | <50%                                  | 50-79%                                                                                    | >80%                                           |
| % of patients providing follow up stool samples (Days 10, 40, 100 and 190)                                              | <50% returning two or more samples    | 50-79% patients returning two or more samples                                             | >80% patients returning two or more samples    |
| Ability to recruit sufficient healthy donors to manufacture all FMT                                                     | Delay in dosing patients >2 weeks     | Delay in dosing patients up to 2 week2                                                    | No delay in patient dosing                     |
| <b>Soft Patient Tolerability Criteria</b><br>Taken into consideration in determining progression to a substantive trial |                                       |                                                                                           |                                                |
| % of patients experiencing reflux                                                                                       | >51%                                  | 21-50%                                                                                    | <20 %                                          |

|                                                    |      |        |       |
|----------------------------------------------------|------|--------|-------|
| following FMT administration                       |      |        |       |
| Intolerable (resulting in withdrawal) side effects | >51% | 21-50% | <20 % |

For peer review only

Table 2. Participant Information Sheet (PIS)

A prospective, randomised placebo controlled feasibility trial of **F**aecal microbiota Transplant to **E**radicate gastrointestinal carriage of **A**ntibiotic **R**esistant **O**rganisms

## The FERARO Trial

### Patient Information Sheet

**We would like to invite you to take part in the FERARO trial.**

- Before you decide whether you would like to take part in the trial, it's important for you to understand why the research is being done and what it would involve.
- Please take some time to read the information carefully, and discuss with your family, friends and doctor, as you wish.
- Ask us if anything is not clear, or you would like some more information

#### **Important things that you need to know:**

- Taking part is completely up to you and you can stop taking part at any time, without giving a reason. If you do not wish to take part, this will not affect the care you receive from your doctors or other health care professionals.
- You have been asked to take part in this study because a sample you have provided contains Antibiotic Resistant Bacteria (ARB). This study is testing the acceptability of a treatment that may be able to reduce the amount of ARB in the gut and the risk of infection.
- Faecal Microbiota Transplant (FMT) is a capsule made up of bacteria taken from a stool (poo) sample donated by healthy people. It could help to restore the balance of bacteria in the gut by reducing the amount of bacteria that are resistant to antibiotics.
- Faecal Microbiota Transplant (FMT) is a treatment used currently to treat patients with repeated *Clostridioides difficile* (C. diff) infection.
- The FERARO trial is looking to see if you consider this to be an acceptable treatment and if there are any side effects.

- You will be allocated to receive either FMT capsules or a placebo (dummy) capsules. You will not know which treatment you receive.
- You will be asked to take five capsules a day for three days in a row. This may be while you are already staying in hospital or as an outpatient.
- You will be asked to provide stool samples before and after receiving treatment to see if there are any changes in the bacteria present in your gut.
- You will be followed up by the study team for six months after completing the treatment.

**If you have any questions about this study, please contact:**

Dr Simon Goldenberg  
Telephone (with message facility): 020 7188 8515  
Email: [simon.goldenberg@gstt.nhs.uk](mailto:simon.goldenberg@gstt.nhs.uk)

### What is the purpose of the study?

The human gut has trillions of good bacteria (germs or bugs) which are important to keep us healthy. In total these bugs are called the microbiota. The bugs are always evolving to beat antibiotics used to fight them and this is known as resistance. Resistance to antibiotics allows bugs to survive and spread.

Antibiotic resistant bacteria (ARB) usually live in the gut (or in the surrounding environment), where they do no harm. This is called colonisation. However, the ARB can appear and cause infection in other parts of the body that normally lack any bacteria, for example in the bladder or blood. When this happens, treatment with a more powerful type of antibiotic is usually needed. This is more likely to happen in people who are more prone to infection, including people with an underlying disease or injury, or people who are already admitted to hospital.

Antibiotic resistance is a growing and serious threat to worldwide health, and means that doctors may be limited in the types of treatments that they can offer to patients. Without effective antibiotics even simple infections could become deadly, making routine medical procedures too dangerous to perform. There is an urgent need to find new antibiotics, but this takes time and is very expensive.

Two particular groups of antibiotic resistant bacteria are known as CRE and ESBL (Carbapenem Resistant Enterobacteriales and Extended Spectrum Beta-lactamase producing bacteria).

Carbapenems and beta-lactams are some of the most powerful types of antibiotics. Some strains of bacteria make enzymes (chemicals), which allow them to destroy carbapenem and beta-lactam antibiotics which makes the bacteria resistant to the antibiotics.

1  
2  
3 There is growing interest in non-antibiotic treatments like Faecal Microbiota Transplant (FMT) to  
4 deal with this problem.  
5

6 FMT is the transfer of bacteria from the guts of healthy donors (taken from their poo / stools) into  
7 the gut of a patient. The aim is to restore a healthy balance of bacteria (reducing harmful ones and  
8 increasing good ones). It is currently used to treat patients with repeated *Clostridioides difficile*  
9 infection. This is an infection causing severe diarrhoea and stomach pain, normally after having  
10 antibiotics which have harmed the microbiota.  
11  
12

13 FMT is very effective and safe in treating this group of patients, with success rates of over 80%.  
14 Initial research shows that it may be helpful in other conditions.  
15  
16

### 17 Why have I been invited to take part? 18

19 You have been identified by a member of your healthcare team as a carrier of ARB. You have had  
20 an infection caused by ARB in the last 6 months. This might be a urine, bloodstream, chest or other  
21 type of infection and may have been on a previous visit to the hospital or from a sample that your  
22 General Practitioner sent to our lab.  
23  
24  
25

### 26 Do I have to take part? 27

28 No, participation in the study is entirely voluntary. It is up to you whether or not you wish to take  
29 part. You will be given time to read the patient information sheet and ask any questions you wish  
30 about the study.  
31  
32

33 If you decide to take part you will be given this information sheet to keep and asked to sign a  
34 consent form. If you decide to take part you are still free to withdraw at any time and without giving  
35 a reason.  
36  
37  
38

### 39 What will happen if I take part? 40

41 You will be asked to provide a stool sample to first check for the presence of the ESBL or CRE  
42 bacteria. If we don't find the bacteria you will not be able to continue in the study and any samples  
43 that you have already provided will be destroyed.  
44  
45

46 If ESBL or CRE bacteria are detected, you will be asked to provide a blood sample and female  
47 participants may be asked to provide a urine sample for a pregnancy test. Once we can confirm that  
48 it is safe for you to enter the study, you will be placed in one of two groups. This will be decided by  
49 chance. One group will receive FMT treatment, and the other will receive placebo (dummy)  
50 capsules. Both groups will be given five identical capsules to take each day for three days in a row.  
51 You will not know which group you are in until the end of the study.  
52  
53  
54

55 Before taking the trial treatment, you will be asked to fast for 4 hours. You cannot eat any food  
56 during this time but you can drink water. You will also be asked to take a commonly prescribed  
57 medication called omeprazole. This works to reduce the amount of acid in the stomach. It will help  
58 protect the good bacteria in the capsules from being damaged.  
59  
60

You will then take all 5 capsules with water or squash. A member of the study team will stay with you for a short time while you take the capsules and check for any side effects. You can eat and drink as normal shortly after taking the capsules. The capsules will only be given on weekdays. If you are already staying in hospital, you will receive the treatment during your stay. If you are allowed to go home during this time, we will ask you to return to the hospital to complete the treatment. If you are not currently admitted to hospital, you will be asked to visit the hospital as an outpatient to complete the treatment.

You will be contacted by the study team by telephone after completing the treatment. This will happen 1 week, 3 months and 6 months after receiving treatment. You will be asked to provide a stool sample using the collection kit provided, and send it back to us in the post (postage will be pre-paid). You will be asked to complete a quality of life questionnaire over the phone. We will ask you how you have been feeling and if you are taking any new medications.

We also ask that you return to St Thomas' Hospital for a visit about 1 month after taking the capsules and we will ask you to bring a stool sample at that visit. We are able to reimburse you for the travel costs of visits to the hospital needed for the study, up to a maximum of £20 per visit.

In total you will be asked to provide five stool samples.

|                                   | Assessment                      | Treatment Day 1                 | Treatment Day 2                 | Treatment Day 3                 | Follow Up 1 week, 3 months, 6 months | Follow Up 1 month |
|-----------------------------------|---------------------------------|---------------------------------|---------------------------------|---------------------------------|--------------------------------------|-------------------|
|                                   | During Hospital Stay or Visit 1 | During Hospital Stay or Visit 2 | During Hospital Stay or Visit 3 | During Hospital Stay or Visit 4 | Telephone Call                       | Hospital Visit    |
| Consent form                      | X                               |                                 |                                 |                                 |                                      |                   |
| Blood sample                      | X                               |                                 |                                 |                                 |                                      | X                 |
| Stool sample                      | X                               |                                 |                                 |                                 | X                                    | X                 |
| Pregnancy test (females)          | X                               |                                 |                                 |                                 |                                      |                   |
| Eligibility Check                 | X                               |                                 |                                 |                                 |                                      |                   |
| Basic health check                | X                               | X                               | X                               | X                               |                                      |                   |
| Quality of Life Questionnaire     | X                               |                                 |                                 |                                 | X                                    | X                 |
| Fasting for 4 hours               |                                 | X                               | X                               | X                               |                                      |                   |
| Capsule administration            |                                 | X                               | X                               | X                               |                                      |                   |
| Side effects and medication check |                                 | X                               | X                               | X                               | X                                    | X                 |

1  
2  
3 With your consent we will send a letter to your GP to let them know that you are taking part in  
4 the trial.  
5

### 6 **What will happen to any samples I provide?**

7

8 Stool samples will be processed in the FMT laboratory at St Thomas's Hospital and divided up  
9 into smaller samples. Some of the sample will be analysed at St Thomas' Hospital and some will  
10 be sent to KCL for analysis. They will be labelled with a study ID number that links the samples to  
11 who you are. This link will be kept securely by the study team and will not be shared with  
12 anybody else. No directly identifiable information will be used to label your samples.  
13  
14

15 You will be asked to provide 14 ml of blood (equivalent to 3 teaspoons) before entering the  
16 study. This is to check that it is safe for you to enter the study. If any of these tests have already  
17 been done as part of your normal care in the previous 5 days, we will not need to repeat them.  
18  
19

### 20 **Will my samples be used in future research?**

21

22 We will ask for your consent to take a blood sample and to use the stool samples that you have  
23 already provided for use in future research in addition to the samples mentioned above. The  
24 consent for storage of samples for future research is optional and will not affect your participation  
25 in the study in any way. If you do consent to this, we will ask you for 40 ml (8 teaspoons) before  
26 receiving the study treatment. This will be taken at the same time as the initial blood sample, so  
27 doesn't require an extra needle. We will also ask for a further 40 ml (8 teaspoons) at the face to  
28 face visit about 1 month after taking the capsules.  
29  
30  
31

### 32 **What are the possible benefits and disadvantages of taking part?**

33

34 This study is designed to look at the safety and tolerability of FMT treatment to see if a larger study  
35 would show an improvement in wellbeing for patients with ARB infections. There are few  
36 treatments available to patients with antimicrobial resistant infections.  
37  
38  
39

40 We hope that the knowledge we would gain from this study will improve our understanding of the  
41 way in which FMT works, and the role of the treatment in antimicrobial resistance. FMT appears to  
42 be safe in the considerable numbers of patients who have received it for other reasons.  
43  
44

45 If you are in the group that receives FMT, it is possible that it will help to reduce the ARB in found  
46 in your gut and reduce the risk of further infections. However, we will not know this until we have  
47 completed this study and future studies. You may not directly benefit from taking part in this study,  
48 but the information gained may help to improve the treatment of people with your condition in the  
49 future.  
50  
51

52 If you decide to take part in the study, you may be asked to attend the hospital more frequently  
53 than you would if you choose not to take part. You will also receive more regular input from a study  
54 doctor and nurse to monitor how you are feeling after the treatment.  
55  
56  
57

### 58 **What is the drug that is being tested?**

59  
60



1  
2  
3 FMT is the transfer of bacteria from the guts of healthy donors (taken from their poo) into the gut  
4 of a patient. FMT is produced by carefully selecting healthy individuals who have undergone an  
5 extensive health assessment and have been tested for a wide range of infections and other  
6 diseases. We follow National guidelines when selecting volunteer donors. The donor poo sample is  
7 processed in the laboratory to concentrate the healthy bacteria and remove most of the water  
8 (freeze drying) which leaves a small amount of powder. The powder is then packed into capsules  
9 which need to be swallowed.  
10

11  
12 FMT is currently used to treat patients with repeated *Clostridioides difficile* infection. In these  
13 patients, FMT is administered via a tube into the stomach or the lower bowel.  
14

15  
16 FMT is very effective and safe in treating this group of patients, with success rates of over 80%.  
17

18  
19 Some patients have experienced side effects, including belching, abdominal cramps and abdominal  
20 pain. Diarrhoea and constipation has also been reported.  
21

22  
23 We hope that producing FMT in capsules will help to minimise any side effects. We will monitor you  
24 closely while you are taking FMT and ask how you are feeling after receiving the treatment.  
25

26  
27 We would like you to report any unexpected symptoms or health events to the study team, even  
28 if you think it is not related to the treatment.  
29

30  
31 Omeprazole

32  
33 Omeprazole reduces the amount of acid your stomach makes. It's a widely used treatment for  
34 indigestion, heartburn and acid reflux.  
35

36  
37 Most people who take omeprazole don't have any side effects, particularly if it is taken over a short  
38 period of time, as is the case here. If you do get a side effect, it's usually mild (such as abdominal  
39 pain, constipation, diarrhoea, dizziness and dry mouth) and will go away when you stop taking  
40 omeprazole.  
41

#### 42 **How is FMT made?**

43

44  
45 After the healthy volunteers have been carefully screened and tested, the stool sample is brought  
46 to the FMT laboratory. Sterile salt water will be added to the stool and it will be filtered to remove  
47 any solid material and then be freeze-dried to remove water.  
48

49  
50 The resultant material is placed into capsules and stored frozen until it is required by the person  
51 who will receive it. Once a patient has been identified and consented to take part in the FERARO  
52 study, the capsules will be administered to the patient.  
53

54  
55 We will store a small amount of the stool sample to assess the types of bacteria present  
56 (microbiota analysis) so that we can compare to the stool samples provided by the patients that  
57 take the FMT.  
58  
59  
60

1  
2  
3 These analyses will be performed at King's College, London for the blood samples. As part of a  
4 separate study the stool sample analysis will be performed at the National Institute for Biological  
5 Standards and Controls.  
6

7 All samples will be completely anonymised. Patients who receive the FMT will not be given any  
8 information about who donated the samples.  
9

10  
11 Stool will be archived for thirty years for traceability, so that in the unlikely event of an infection  
12 occurring in the recipient the donor stool can be checked for infection also. The data will be  
13 anonymised and will only be accessible to members of the trials team. After this period it will be  
14 destroyed.  
15

### 16 17 18 **Who is organising and funding this study?**

19  
20 The doctor in charge of this study is Dr Simon Goldenberg. The study is funded by the National  
21 Institute of Health Research and is being sponsored by Guy's and St Thomas' NHS Foundation  
22 Trust.  
23

### 24 25 26 **Who has reviewed the study?**

27  
28 All research in the NHS is looked at by an independent group of people, called a Research Ethics  
29 Committee, to protect your interests. This study has been reviewed and approved by the London –  
30 City and East Research Ethics committee (reference 20/LO/0117.) It has also been reviewed by an  
31 independent review group and approved by the Health Research authority and the Medicines and  
32 Healthcare products Regulatory Agency.  
33

### 34 35 36 **What if something goes wrong?**

37  
38 If you have a concern about any aspect of this study, you should ask to speak to your study doctor  
39 who will do their best to answer your questions (contact details on page 2 of this information  
40 sheet).  
41

42  
43 If you remain unhappy and wish to complain formally, you can do this through the NHS  
44 Complaints procedure by contacting the Patient Advice Liaison Service (PALS) office.  
45

46  
47 Guy's and St Thomas' NHS Foundation Trust PALS  
48 Contact number: 0207 188 8801 or pals@gstt.nhs.uk  
49

50  
51  
52 Every care will be taken in the course of this study. However in the unlikely event that you are  
53 injured by taking part, compensation may be available.  
54

55  
56 In the event that something does go wrong and you are harmed during the research and this is  
57 due to someone's negligence then you may have grounds for a legal action for compensation  
58 against Guy's and St. Thomas' NHS Foundation Trust, but you may have to pay your legal costs.  
59  
60

## How will we use information about you?

We will need to use information from you and from your medical records for this research project. This information will include your hospital number, name, date of birth, address and contact details. People will use this information to do the research or to check your records to make sure that the research is being done properly.

People who do not need to know who you are will not be able to see your name or contact details. Your data will have a code number instead. We will keep all information about you safe and secure.

Once we have finished the study, we will keep some of the data so we can check the results. We will write our reports in a way that no-one can work out that you took part in the study.

## What are your choices about how your information is used?

You can stop being part of the study at any time, without giving a reason, but we will keep information about you that we already have.

If you agree to take part in this study, you will have the option to take part in future research using your data saved from this study.

## Where can you find out more about how your information is used?

You can find out more about how we use your information at:

[www.guysandstthomas.nhs.uk/research/patients/use-of-data.aspx](http://www.guysandstthomas.nhs.uk/research/patients/use-of-data.aspx)

at [www.hra.nhs.uk/information-about-patients/](http://www.hra.nhs.uk/information-about-patients/)

by asking one of the research team or by sending an email to the Chief Investigator

[simon.goldenberg@gstt.nhs.uk](mailto:simon.goldenberg@gstt.nhs.uk)

## What will happen to the results of the research study?

Once the data has been analysed we plan to publish the results in an international journal so that the information can benefit as many people as possible. We can provide you with a brief summary of the results of the study when available should you desire this. If you would like to be kept informed about the results of the study, please email the Chief Investigator using the details below.

## Contact details:

Thank you for taking the time to read this information. If there is any other information you would like, please do not hesitate to contact the study team on the numbers below.

|                     |                     |                                    |
|---------------------|---------------------|------------------------------------|
| Study co-ordinator: | Dr Blair Merrick    | Tel: 0207 188 7188 extension 53339 |
| Research Nurse:     | Karen Bisnauthsing  | Tel: 0207 188 7188 extension 53339 |
| Chief Investigator: | Dr Simon Goldenberg | Tel: 0207 188 8515                 |

Table 3. Healthy donor inclusion and exclusion criteria

|                                                                                                                                                                                                                                                                                                                                                                                                                                                                                                                                                                                                                                                                                                                                                                                                                                                                                                                                                                                                                                                                                                                                                                                                                                                         |
|---------------------------------------------------------------------------------------------------------------------------------------------------------------------------------------------------------------------------------------------------------------------------------------------------------------------------------------------------------------------------------------------------------------------------------------------------------------------------------------------------------------------------------------------------------------------------------------------------------------------------------------------------------------------------------------------------------------------------------------------------------------------------------------------------------------------------------------------------------------------------------------------------------------------------------------------------------------------------------------------------------------------------------------------------------------------------------------------------------------------------------------------------------------------------------------------------------------------------------------------------------|
| <p><b>Inclusion criteria</b></p> <ul style="list-style-type: none"> <li>• 18-60 years of age <b>AND</b></li> <li>• BMI 18-30</li> </ul>                                                                                                                                                                                                                                                                                                                                                                                                                                                                                                                                                                                                                                                                                                                                                                                                                                                                                                                                                                                                                                                                                                                 |
| <p><b>Exclusion criteria</b></p> <ul style="list-style-type: none"> <li>• Received antimicrobials within past 3 months</li> <li>• Known prior exposure to HIV and/or viral hepatitis</li> <li>• Known previous or latent tuberculosis</li> <li>• Risk factors for blood borne viruses within the previous 6 months</li> <li>• Received live attenuated vaccine within past 6 months</li> <li>• Underlying gastrointestinal condition/ or unexplained symptoms including acute diarrhoea in 2 weeks prior to donating</li> <li>• Family history of any significant gastrointestinal condition</li> <li>• History of atopy, systemic autoimmune condition, diabetes, neurological or psychiatric condition or known risk of prion disease. History of chronic pain syndrome including chronic fatigue and fibromyalgia, or malignancy.</li> <li>• Taking any regular medications</li> <li>• History of taking proton pump inhibitors or immunosuppressive medications within the past 3 months</li> <li>• Ever received growth hormone, insulin from cows or clotting factor concentrates</li> <li>• Received an experimental medicine or vaccine within the past 6 months</li> <li>• Travelled to a tropical country within the past 6 months</li> </ul> |

Table 4. Donor screening and eligibility questionnaire

**Faecal Microbiota Transplant (FMT) –Donor programme**

|                                           |                                                                                                                                                                                                                                                                                                                                                                                                                                                                                                                                                                                                                                                                                                                                                                                                                                                                                                          |
|-------------------------------------------|----------------------------------------------------------------------------------------------------------------------------------------------------------------------------------------------------------------------------------------------------------------------------------------------------------------------------------------------------------------------------------------------------------------------------------------------------------------------------------------------------------------------------------------------------------------------------------------------------------------------------------------------------------------------------------------------------------------------------------------------------------------------------------------------------------------------------------------------------------------------------------------------------------|
| Donor name                                |                                                                                                                                                                                                                                                                                                                                                                                                                                                                                                                                                                                                                                                                                                                                                                                                                                                                                                          |
| Donor date of birth                       |                                                                                                                                                                                                                                                                                                                                                                                                                                                                                                                                                                                                                                                                                                                                                                                                                                                                                                          |
| Donor Hospital number                     |                                                                                                                                                                                                                                                                                                                                                                                                                                                                                                                                                                                                                                                                                                                                                                                                                                                                                                          |
| Donor number                              |                                                                                                                                                                                                                                                                                                                                                                                                                                                                                                                                                                                                                                                                                                                                                                                                                                                                                                          |
| Donor contact details – telephone / email |                                                                                                                                                                                                                                                                                                                                                                                                                                                                                                                                                                                                                                                                                                                                                                                                                                                                                                          |
| Name of assessor                          |                                                                                                                                                                                                                                                                                                                                                                                                                                                                                                                                                                                                                                                                                                                                                                                                                                                                                                          |
| Position                                  |                                                                                                                                                                                                                                                                                                                                                                                                                                                                                                                                                                                                                                                                                                                                                                                                                                                                                                          |
| Date of assessment                        |                                                                                                                                                                                                                                                                                                                                                                                                                                                                                                                                                                                                                                                                                                                                                                                                                                                                                                          |
| Age                                       | Exclude if <18 or >60                                                                                                                                                                                                                                                                                                                                                                                                                                                                                                                                                                                                                                                                                                                                                                                                                                                                                    |
| Gender                                    | <input type="checkbox"/> Male <input type="checkbox"/> Female                                                                                                                                                                                                                                                                                                                                                                                                                                                                                                                                                                                                                                                                                                                                                                                                                                            |
| Ethnicity                                 | <input type="checkbox"/> White - White British<br><input type="checkbox"/> White - White Irish<br><input type="checkbox"/> White - Other<br><input type="checkbox"/> Mixed race – White and Black Caribbean<br><input type="checkbox"/> Mixed race – White and Black African<br><input type="checkbox"/> Mixed race – White and Asian<br><input type="checkbox"/> Mixed race – Other<br><input type="checkbox"/> Asian or Asian British – Indian<br><input type="checkbox"/> Asian or Asian British – Bangladeshi<br><input type="checkbox"/> Asian or Asian British – Pakistani<br><input type="checkbox"/> Asian or Asian British – Other<br><input type="checkbox"/> Black or Black British – Caribbean<br><input type="checkbox"/> Black or Black British – African<br><input type="checkbox"/> Black or Black British – Other<br><input type="checkbox"/> Chinese<br><input type="checkbox"/> Other |
| Height                                    | cm                                                                                                                                                                                                                                                                                                                                                                                                                                                                                                                                                                                                                                                                                                                                                                                                                                                                                                       |
| Weight                                    |                                                                                                                                                                                                                                                                                                                                                                                                                                                                                                                                                                                                                                                                                                                                                                                                                                                                                                          |

|                                                                        |                                                                                                                                                                                                                                                                                                                                                                                                                                                                           |
|------------------------------------------------------------------------|---------------------------------------------------------------------------------------------------------------------------------------------------------------------------------------------------------------------------------------------------------------------------------------------------------------------------------------------------------------------------------------------------------------------------------------------------------------------------|
|                                                                        | kg                                                                                                                                                                                                                                                                                                                                                                                                                                                                        |
| BMI                                                                    |                                                                                                                                                                                                                                                                                                                                                                                                                                                                           |
|                                                                        | Exclude if BMI $\leq 18$ or $\geq 30$                                                                                                                                                                                                                                                                                                                                                                                                                                     |
| Has your weight changed by more than 5lb / 2kg in the past 6 months?   | <input type="checkbox"/> Yes <input type="checkbox"/> No                                                                                                                                                                                                                                                                                                                                                                                                                  |
|                                                                        | Detail:                                                                                                                                                                                                                                                                                                                                                                                                                                                                   |
| Describe your diet (as many as apply):                                 | <input type="checkbox"/> Omnivore<br><input type="checkbox"/> Vegetarian<br><input type="checkbox"/> Vegan<br><input type="checkbox"/> Kosher<br><input type="checkbox"/> Halal<br><input type="checkbox"/> Raw food only<br><input type="checkbox"/> Pescatarian<br><input type="checkbox"/> No red meat<br><input type="checkbox"/> Low carbohydrate<br><input type="checkbox"/> Lactose free<br><input type="checkbox"/> Gluten free<br><input type="checkbox"/> Other |
| How many portions of fruit and vegetables do you consume per day?      | <input type="checkbox"/> one or less<br><input type="checkbox"/> two to three<br><input type="checkbox"/> three to four<br><input type="checkbox"/> five to six<br><input type="checkbox"/> seven or more                                                                                                                                                                                                                                                                 |
| How many servings of cow, sheep or goat's milk do you consume per day? | <input type="checkbox"/> one or less<br><input type="checkbox"/> two to three<br><input type="checkbox"/> three to four<br><input type="checkbox"/> five to six<br><input type="checkbox"/> seven or more                                                                                                                                                                                                                                                                 |
| Alcohol – units/week                                                   |                                                                                                                                                                                                                                                                                                                                                                                                                                                                           |
| Smoking/day                                                            |                                                                                                                                                                                                                                                                                                                                                                                                                                                                           |
| Do you take any illicit drugs?                                         | <input type="checkbox"/> Yes <input type="checkbox"/> No                                                                                                                                                                                                                                                                                                                                                                                                                  |
|                                                                        | Exclude if YES                                                                                                                                                                                                                                                                                                                                                                                                                                                            |
| Normal bowel habit – average Bristol Stool Consistency                 | <input type="checkbox"/> 1<br><input type="checkbox"/> 2<br><input type="checkbox"/> 3<br><input type="checkbox"/> 4<br><input type="checkbox"/> 5<br><input type="checkbox"/> 6<br><input type="checkbox"/> 7                                                                                                                                                                                                                                                            |
|                                                                        | Exclude if 1, 6 or 7                                                                                                                                                                                                                                                                                                                                                                                                                                                      |

|                                                 |                                                                                                                                                                                         |                                                                                                                                                                                                                                                      |
|-------------------------------------------------|-----------------------------------------------------------------------------------------------------------------------------------------------------------------------------------------|------------------------------------------------------------------------------------------------------------------------------------------------------------------------------------------------------------------------------------------------------|
| 1<br>2<br>3<br>4<br>5<br>6<br>7<br>8<br>9<br>10 | Normal bowel habit – average frequency                                                                                                                                                  | <input type="checkbox"/> >2/day<br><input type="checkbox"/> once to twice daily<br><input type="checkbox"/> once / 2 days<br><input type="checkbox"/> <once / 2 days<br><br>Exclude if active diarrhoea (>3 UBM/day for at least 2 consecutive days) |
| 11<br>12<br>13<br>14<br>15                      | Have you ever been rejected as a blood donor/told not to donate? If yes, why?                                                                                                           | <input type="checkbox"/> Yes <input type="checkbox"/> No<br><br>Exclude if YES                                                                                                                                                                       |
| 16<br>17                                        | What is your country of birth?                                                                                                                                                          |                                                                                                                                                                                                                                                      |
| 18<br>19<br>20<br>21<br>22                      | Have you ever resided in another country (other than UK) for >5 years? If so which countries and when?                                                                                  | <input type="checkbox"/> Yes <input type="checkbox"/> No                                                                                                                                                                                             |
| 23<br>24<br>25<br>26<br>27<br>28<br>29<br>30    | Do you currently have a profession that is associated with an increased risk of blood-borne transmissible diseases (e.g. daily contact with patients/inmates)? If yes, what profession? | <input type="checkbox"/> Yes <input type="checkbox"/> No<br><br>Exclude if health/social care worker with <u>direct</u> patient contact                                                                                                              |
| 31<br>32<br>33<br>34<br>35<br>36<br>37<br>38    | Have you ever had a needle-stick or injury from a blood contaminated object from someone else? If yes, when and how was this follow up?                                                 | <input type="checkbox"/> Yes <input type="checkbox"/> No                                                                                                                                                                                             |
| 39<br>40<br>41<br>42<br>43<br>44<br>45<br>46    | Have you ever injected yourself or been injected with illegal or non-prescribed drugs including body building drugs or cosmetics (even if this was only once or a long time ago?)       | <input type="checkbox"/> Yes <input type="checkbox"/> No<br><br>Exclude if YES                                                                                                                                                                       |
| 47<br>48<br>49<br>50                            | Have you ever had a tattoo? If yes, when and in which country was it performed?                                                                                                         | <input type="checkbox"/> Yes <input type="checkbox"/> No<br><br>Exclude if within past 6 months                                                                                                                                                      |
| 51<br>52<br>53<br>54                            | Have you ever had a piercing? If yes, when and in which country was it performed?                                                                                                       | <input type="checkbox"/> Yes <input type="checkbox"/> No<br><br>Exclude if within past 6 months                                                                                                                                                      |
| 55<br>56<br>57<br>58                            | Have you ever had acupuncture? If yes, when and in which country was it performed?                                                                                                      | <input type="checkbox"/> Yes <input type="checkbox"/> No<br><br>Exclude if within past 4 months                                                                                                                                                      |
| 59<br>60                                        | Have you ever had an operation or undergone clinical treatment in                                                                                                                       | <input type="checkbox"/> Yes <input type="checkbox"/> No                                                                                                                                                                                             |

|                                        |                                                                                                                                                                            |                                                                                                                                                                                                                                              |
|----------------------------------------|----------------------------------------------------------------------------------------------------------------------------------------------------------------------------|----------------------------------------------------------------------------------------------------------------------------------------------------------------------------------------------------------------------------------------------|
| 1<br>2<br>3<br>4<br>5<br>6<br>7        | a hospital with poor hygienic conditions?<br>If yes, when and in which country was it performed?                                                                           |                                                                                                                                                                                                                                              |
| 8<br>9<br>10<br>11<br>12<br>13         | Have you ever had a rare infectious disease (e.g. tuberculosis, malaria, trypanosomiasis)?<br>If yes, when and which disease?                                              | <input type="checkbox"/> Yes <input type="checkbox"/> No                                                                                                                                                                                     |
| 14<br>15<br>16<br>17                   | Have you ever been vaccinated against Hepatitis A or B?<br>If yes, which?                                                                                                  | <input type="checkbox"/> Yes <input type="checkbox"/> No                                                                                                                                                                                     |
| 18<br>19<br>20                         | In the last 12 months have you had sex with anyone who is HIV positive?                                                                                                    | <input type="checkbox"/> Yes <input type="checkbox"/> No<br>Exclude if Yes                                                                                                                                                                   |
| 21<br>22<br>23<br>24                   | In the last 12 months have you had sex with anyone with hepatitis B, hepatitis C or HTLV?                                                                                  | <input type="checkbox"/> Yes <input type="checkbox"/> No<br>Exclude if Yes                                                                                                                                                                   |
| 25<br>26<br>27<br>28<br>29             | In the last 12 months have you had sex with anyone who has ever been given money or drugs for sex?                                                                         | <input type="checkbox"/> Yes <input type="checkbox"/> No<br>Exclude if Yes                                                                                                                                                                   |
| 30<br>31<br>32<br>33                   | In the last 12 months have you had sex with anyone who has ever injected drugs?                                                                                            | <input type="checkbox"/> Yes <input type="checkbox"/> No<br>Exclude if Yes                                                                                                                                                                   |
| 34<br>35<br>36<br>37<br>38<br>39<br>40 | In the last 12 months have you had sex with anyone who may ever have had sex in parts of the world where HIV/AIDS is very common (this includes most countries in Africa)? | <input type="checkbox"/> Yes <input type="checkbox"/> No<br>Exclude if Yes                                                                                                                                                                   |
| 41<br>42<br>43<br>44<br>45             | <b>Male donors ONLY:</b><br>In the last 12 months have you ever had oral or anal sex with a man, with or without a condom?                                                 | <input type="checkbox"/> Yes <input type="checkbox"/> No<br>Exclude if Yes                                                                                                                                                                   |
| 46<br>47<br>48<br>49<br>50<br>51       | <b>Female donors ONLY:</b><br>In the last 12 months have you had sex with a man who has ever had oral or anal sex with another man, with or without a condom?              | <input type="checkbox"/> Yes <input type="checkbox"/> No<br>Exclude if Yes                                                                                                                                                                   |
| 52<br>53<br>54<br>55                   | Have you ever been treated for an intestinal infection?<br>If yes, which one and when?                                                                                     | <input type="checkbox"/> Yes <input type="checkbox"/> No                                                                                                                                                                                     |
| 56<br>57<br>58<br>59<br>60             | Do you have any gastro-intestinal conditions:<br>Barretts Oesophagus<br>Coeliac disease<br>Diverticular disease                                                            | <input type="checkbox"/> Yes <input type="checkbox"/> No<br><input type="checkbox"/> Yes <input type="checkbox"/> No<br><input type="checkbox"/> Yes <input type="checkbox"/> No<br><input type="checkbox"/> Yes <input type="checkbox"/> No |



|                                                                                                             |                                                                                                                                                                                                                                                                                                                                                                             |                                                                                                                                                                                                                                                                                                                                                                                                                                                                                                                                                                                                                                                                                                                                                                                                                                                                                                                                                                                                                                  |
|-------------------------------------------------------------------------------------------------------------|-----------------------------------------------------------------------------------------------------------------------------------------------------------------------------------------------------------------------------------------------------------------------------------------------------------------------------------------------------------------------------|----------------------------------------------------------------------------------------------------------------------------------------------------------------------------------------------------------------------------------------------------------------------------------------------------------------------------------------------------------------------------------------------------------------------------------------------------------------------------------------------------------------------------------------------------------------------------------------------------------------------------------------------------------------------------------------------------------------------------------------------------------------------------------------------------------------------------------------------------------------------------------------------------------------------------------------------------------------------------------------------------------------------------------|
| 1<br>2<br>3<br>4<br>5<br>6<br>7<br>8<br>9<br>10<br>11<br>12<br>13<br>14<br>15<br>16<br>17<br>18<br>19<br>20 | <p>Bariatric surgery</p> <p>Gastric ulcer</p> <p>Gasto-oesophageal reflux disease</p> <p>Hepatitis</p> <p>H. pylori infection</p> <p>Crohns disease</p> <p>Ulcerative colitis</p> <p>Other inflammatory bowel diseases</p> <p>Irritable Bowel Syndrome</p> <p>Lactose intolerance</p> <p>Liver disease</p> <p>Pancreatitis</p> <p>Gastrointestinal malignancy or polyps</p> | <p><input type="checkbox"/> Yes <input type="checkbox"/> No</p> <p>Exclude if Inflammatory Bowel Disease, Irritable Bowel Syndrome, GI malignancy, Hepatitis</p> |
| 21<br>22<br>23<br>24                                                                                        | <p>Is there any family history of inflammatory Bowel Disease or colorectal cancer?</p>                                                                                                                                                                                                                                                                                      | <p><input type="checkbox"/> Yes <input type="checkbox"/> No</p> <p>Exclude if Yes</p>                                                                                                                                                                                                                                                                                                                                                                                                                                                                                                                                                                                                                                                                                                                                                                                                                                                                                                                                            |
| 25<br>26<br>27                                                                                              | <p>Have you taken any antibiotics in the last 3 months?</p>                                                                                                                                                                                                                                                                                                                 | <p><input type="checkbox"/> Yes <input type="checkbox"/> No</p> <p>Exclude if Yes</p>                                                                                                                                                                                                                                                                                                                                                                                                                                                                                                                                                                                                                                                                                                                                                                                                                                                                                                                                            |
| 28<br>29<br>30                                                                                              | <p>Have you had a fever in the last 2 weeks?</p>                                                                                                                                                                                                                                                                                                                            | <p><input type="checkbox"/> Yes <input type="checkbox"/> No</p> <p>Exclude if Yes</p>                                                                                                                                                                                                                                                                                                                                                                                                                                                                                                                                                                                                                                                                                                                                                                                                                                                                                                                                            |
| 31<br>32<br>33<br>34<br>35                                                                                  | <p>Have you received a live vaccination within the past 6 months?</p>                                                                                                                                                                                                                                                                                                       | <p><input type="checkbox"/> Yes <input type="checkbox"/> No</p> <p>Exclude if Yes</p>                                                                                                                                                                                                                                                                                                                                                                                                                                                                                                                                                                                                                                                                                                                                                                                                                                                                                                                                            |
| 36<br>37<br>38                                                                                              | <p>Have you ever been incarcerated in prison?</p>                                                                                                                                                                                                                                                                                                                           | <p><input type="checkbox"/> Yes <input type="checkbox"/> No</p> <p>Exclude if in past 4 months</p>                                                                                                                                                                                                                                                                                                                                                                                                                                                                                                                                                                                                                                                                                                                                                                                                                                                                                                                               |
| 39<br>40<br>41<br>42<br>43<br>44                                                                            | <p>Have you ever been immunosuppressed (e.g. during treatment for cancer, or for a solid organ transplant)?<br/>If yes, when and why?</p>                                                                                                                                                                                                                                   | <p><input type="checkbox"/> Yes <input type="checkbox"/> No</p>                                                                                                                                                                                                                                                                                                                                                                                                                                                                                                                                                                                                                                                                                                                                                                                                                                                                                                                                                                  |
| 45<br>46<br>47<br>48                                                                                        | <p>Have you ever had major gastrointestinal surgery?<br/>If yes, when and why?</p>                                                                                                                                                                                                                                                                                          | <p><input type="checkbox"/> Yes <input type="checkbox"/> No</p> <p>Relative exclusion criteria</p>                                                                                                                                                                                                                                                                                                                                                                                                                                                                                                                                                                                                                                                                                                                                                                                                                                                                                                                               |
| 49<br>50<br>51                                                                                              | <p>Have you ever suffered from metabolic syndrome or diabetes?</p>                                                                                                                                                                                                                                                                                                          | <p><input type="checkbox"/> Yes <input type="checkbox"/> No</p> <p>Exclude if Yes</p>                                                                                                                                                                                                                                                                                                                                                                                                                                                                                                                                                                                                                                                                                                                                                                                                                                                                                                                                            |
| 52<br>53<br>54<br>55<br>56<br>57                                                                            | <p>Have you ever suffered from any autoimmune condition (e.g. rheumatoid), asthma or eczema?<br/>If yes, which, and do you take any treatment?</p>                                                                                                                                                                                                                          | <p><input type="checkbox"/> Yes <input type="checkbox"/> No</p> <p>Relative exclusion criteria</p>                                                                                                                                                                                                                                                                                                                                                                                                                                                                                                                                                                                                                                                                                                                                                                                                                                                                                                                               |
| 58<br>59<br>60                                                                                              | <p>Have you ever had any chronic pain or fatigue syndromes e.g.</p>                                                                                                                                                                                                                                                                                                         | <p><input type="checkbox"/> Yes <input type="checkbox"/> No</p>                                                                                                                                                                                                                                                                                                                                                                                                                                                                                                                                                                                                                                                                                                                                                                                                                                                                                                                                                                  |

|                                                                                                                                                                                                                                                                                                                                                                                                                                                                                                                                                                                                                                                                                                                                                  |                                                                                       |
|--------------------------------------------------------------------------------------------------------------------------------------------------------------------------------------------------------------------------------------------------------------------------------------------------------------------------------------------------------------------------------------------------------------------------------------------------------------------------------------------------------------------------------------------------------------------------------------------------------------------------------------------------------------------------------------------------------------------------------------------------|---------------------------------------------------------------------------------------|
| <p>chronic fatigue syndrome, fibromyalgia?<br/>If yes, which?</p>                                                                                                                                                                                                                                                                                                                                                                                                                                                                                                                                                                                                                                                                                | <p>Exclude if Yes</p>                                                                 |
| <p>Have you any history of CJD or other prion disease in your family? If yes, please specify<br/>Patients should be considered to be at risk from genetic forms of CJD if they have or have had</p> <ol style="list-style-type: none"> <li>1. Genetic testing, which has indicated they are at significant risk of developing CJD or other prion disease</li> <li>2. A blood relative known to have a genetic mutation indicative of genetic CJD or other prion disease</li> <li>3. Two or more blood relatives affected by CJD or other prion disease</li> </ol>                                                                                                                                                                                | <p><input type="checkbox"/> Yes <input type="checkbox"/> No</p> <p>Exclude if Yes</p> |
| <p>Have you ever received growth hormone or gonadotrophic treatment? If yes, please specify;</p> <p>i) Whether the hormone was derived from human pituitary glands</p> <p>ii) The year of the treatment</p> <p>iii) Whether the treatment was received in the UK or in another country</p> <p>Recipients of hormone derived from human pituitary glands e.g. growth hormone or gonadotrophin have been identified as potentially at risk of CJD. In the UK, the use of human growth hormone was stopped in 1985 but human-derived products may have been continued to be used in other countries. In the UK, the use of human-derived gonadotrophin was discontinued in 1973 but may have been continued in other countries after this time.</p> | <p><input type="checkbox"/> Yes <input type="checkbox"/> No</p> <p>Exclude if Yes</p> |

|                                                                                                                                                                                                                                                                                                                                                                                                                                                                                                                                                                                                                                            |                                                                                                                             |
|--------------------------------------------------------------------------------------------------------------------------------------------------------------------------------------------------------------------------------------------------------------------------------------------------------------------------------------------------------------------------------------------------------------------------------------------------------------------------------------------------------------------------------------------------------------------------------------------------------------------------------------------|-----------------------------------------------------------------------------------------------------------------------------|
| <p>1<br/>2<br/>3<br/>4 Have you ever had surgery on<br/>5 your brain or spinal cord?<br/>6 People who underwent intradural<br/>7 neurosurgical or spinal<br/>8 procedures before August 1992<br/>9 may have received a graft of<br/>10 human-derived dura mater and<br/>11 should be treated as at increased<br/>12 risk, unless evidence can be<br/>13 provided that human-derived<br/>14 dura mater was not used. Patients<br/>15 who received a graft of human-<br/>16 derived dura mater between 1980<br/>17 and August 1992 are at increased<br/>18 risk of both sporadic CJD and<br/>19 vCJD.<br/>20<br/>21<br/>22<br/>23<br/>24</p> | <p><input type="checkbox"/> Yes <input type="checkbox"/> No</p> <p>Exclude if Yes</p>                                       |
| <p>25 Are you normally resident in the<br/>26 UK?<br/>27 If No state country of usual<br/>28 residence<br/>29<br/>30</p>                                                                                                                                                                                                                                                                                                                                                                                                                                                                                                                   | <p><input type="checkbox"/> Yes <input type="checkbox"/> No</p>                                                             |
| <p>31 Which countries have you visited<br/>32 in the last 12 months and what<br/>33 was the duration of stay?<br/>34<br/>35<br/>36<br/>37<br/>38<br/>39<br/>40<br/>41</p>                                                                                                                                                                                                                                                                                                                                                                                                                                                                  | <p>Relative exclusions apply to tropical countries</p>                                                                      |
| <p>42 In the past 12 months have you<br/>43 been admitted to a hospital in a<br/>44 country other than the UK?<br/>45<br/>46 If yes state when and which<br/>47 countries<br/>48</p>                                                                                                                                                                                                                                                                                                                                                                                                                                                       | <p><input type="checkbox"/> Yes <input type="checkbox"/> No</p>                                                             |
| <p>49 Are you taking any regular<br/>50 medications?<br/>51<br/>52 List all current medications:<br/>53<br/>54<br/>55<br/>56<br/>57<br/>58<br/>59<br/>60</p>                                                                                                                                                                                                                                                                                                                                                                                                                                                                               | <p><input type="checkbox"/> Yes <input type="checkbox"/> No</p> <p>Exclude if any regular prescribed drugs (except OCP)</p> |

1  
2  
3  
4  
5  
6  
7  
8  
9  
10  
11  
12  
13  
14  
15  
16  
17  
18  
19  
20  
21  
22  
23  
24  
25  
26  
27  
28  
29  
30  
31  
32  
33  
34  
35  
36  
37  
38  
39  
40  
41  
42  
43  
44  
45  
46  
47  
48  
49  
50  
51  
52  
53  
54  
55  
56  
57  
58  
59  
60

|  |  |
|--|--|
|  |  |
|--|--|

For peer review only

# Reporting checklist for protocol of a clinical trial.

Based on the SPIRIT guidelines.

## Instructions to authors

Complete this checklist by entering the page numbers from your manuscript where readers will find each of the items listed below.

Your article may not currently address all the items on the checklist. Please modify your text to include the missing information. If you are certain that an item does not apply, please write "n/a" and provide a short explanation.

Upload your completed checklist as an extra file when you submit to a journal.

In your methods section, say that you used the SPIRIT reporting guidelines, and cite them as:

Chan A-W, Tetzlaff JM, Altman DG, Laupacis A, Gøtzsche PC, Krleža-Jerić K, Hróbjartsson A, Mann H, Dickersin K, Berlin J, Doré C, Parulekar W, Summerskill W, Groves T, Schulz K, Sox H, Rockhold FW, Rennie D, Moher D. SPIRIT 2013 Statement: Defining standard protocol items for clinical trials. *Ann Intern Med.* 2013;158(3):200-207

|                                             |                     | Reporting Item                                                                                               | Page Number |
|---------------------------------------------|---------------------|--------------------------------------------------------------------------------------------------------------|-------------|
| <b>Administrative information</b>           |                     |                                                                                                              |             |
| Title                                       | <a href="#">#1</a>  | Descriptive title identifying the study design, population, interventions, and, if applicable, trial acronym | 1           |
| Trial registration                          | <a href="#">#2a</a> | Trial identifier and registry name. If not yet registered, name of intended registry                         | 2           |
| Trial registration: data set                | <a href="#">#2b</a> | All items from the World Health Organization Trial Registration Data Set                                     | 4           |
| Protocol version                            | <a href="#">#3</a>  | Date and version identifier                                                                                  | 2           |
| Funding                                     | <a href="#">#4</a>  | Sources and types of financial, material, and other support                                                  | 13          |
| Roles and responsibilities: contributorship | <a href="#">#5a</a> | Names, affiliations, and roles of protocol contributors                                                      | 13          |

|    |                           |                     |                                                                    |        |
|----|---------------------------|---------------------|--------------------------------------------------------------------|--------|
| 1  | Roles and                 | <a href="#">#5b</a> | Name and contact information for the trial sponsor                 | 13     |
| 2  | responsibilities:         |                     |                                                                    |        |
| 3  | sponsor contact           |                     |                                                                    |        |
| 4  | information               |                     |                                                                    |        |
| 5  |                           |                     |                                                                    |        |
| 6  |                           |                     |                                                                    |        |
| 7  |                           |                     |                                                                    |        |
| 8  | Roles and                 | <a href="#">#5c</a> | Role of study sponsor and funders, if any, in study design;        | 13, 14 |
| 9  | responsibilities:         |                     | collection, management, analysis, and interpretation of data;      |        |
| 10 | sponsor and funder        |                     | writing of the report; and the decision to submit the report for   |        |
| 11 |                           |                     | publication, including whether they will have ultimate authority   |        |
| 12 |                           |                     | over any of these activities                                       |        |
| 13 |                           |                     |                                                                    |        |
| 14 |                           |                     |                                                                    |        |
| 15 |                           |                     |                                                                    |        |
| 16 | Roles and                 | <a href="#">#5d</a> | Composition, roles, and responsibilities of the coordinating       | 12     |
| 17 | responsibilities:         |                     | centre, steering committee, endpoint adjudication committee,       |        |
| 18 | committees                |                     | data management team, and other individuals or groups              |        |
| 19 |                           |                     | overseeing the trial, if applicable (see Item 21a for data         |        |
| 20 |                           |                     | monitoring committee)                                              |        |
| 21 |                           |                     |                                                                    |        |
| 22 |                           |                     |                                                                    |        |
| 23 |                           |                     |                                                                    |        |
| 24 | <b>Introduction</b>       |                     |                                                                    |        |
| 25 |                           |                     |                                                                    |        |
| 26 |                           |                     |                                                                    |        |
| 27 | Background and            | <a href="#">#6a</a> | Description of research question and justification for undertaking | 3      |
| 28 | rationale                 |                     | the trial, including summary of relevant studies (published and    |        |
| 29 |                           |                     | unpublished) examining benefits and harms for each intervention    |        |
| 30 |                           |                     |                                                                    |        |
| 31 |                           |                     |                                                                    |        |
| 32 | Background and            | <a href="#">#6b</a> | Explanation for choice of comparators                              | 4      |
| 33 | rationale: choice of      |                     |                                                                    |        |
| 34 | comparators               |                     |                                                                    |        |
| 35 |                           |                     |                                                                    |        |
| 36 |                           |                     |                                                                    |        |
| 37 | Objectives                | <a href="#">#7</a>  | Specific objectives or hypotheses                                  | 4      |
| 38 |                           |                     |                                                                    |        |
| 39 |                           |                     |                                                                    |        |
| 40 | Trial design              | <a href="#">#8</a>  | Description of trial design including type of trial (eg, parallel  | 5      |
| 41 |                           |                     | group, crossover, factorial, single group), allocation ratio, and  |        |
| 42 |                           |                     | framework (eg, superiority, equivalence, non-inferiority,          |        |
| 43 |                           |                     | exploratory)                                                       |        |
| 44 |                           |                     |                                                                    |        |
| 45 |                           |                     |                                                                    |        |
| 46 | <b>Methods:</b>           |                     |                                                                    |        |
| 47 | <b>Participants,</b>      |                     |                                                                    |        |
| 48 | <b>interventions, and</b> |                     |                                                                    |        |
| 49 | <b>outcomes</b>           |                     |                                                                    |        |
| 50 |                           |                     |                                                                    |        |
| 51 |                           |                     |                                                                    |        |
| 52 |                           |                     |                                                                    |        |
| 53 | Study setting             | <a href="#">#9</a>  | Description of study settings (eg, community clinic, academic      | 7      |
| 54 |                           |                     | hospital) and list of countries where data will be collected.      |        |
| 55 |                           |                     | Reference to where list of study sites can be obtained             |        |
| 56 |                           |                     |                                                                    |        |
| 57 |                           |                     |                                                                    |        |
| 58 |                           |                     |                                                                    |        |
| 59 |                           |                     |                                                                    |        |
| 60 |                           |                     |                                                                    |        |

|    |                              |                      |                                                                                                                                                                                                                                                                                                                                                                                |    |
|----|------------------------------|----------------------|--------------------------------------------------------------------------------------------------------------------------------------------------------------------------------------------------------------------------------------------------------------------------------------------------------------------------------------------------------------------------------|----|
| 1  | Eligibility criteria         | <a href="#">#10</a>  | Inclusion and exclusion criteria for participants. If applicable, eligibility criteria for study centres and individuals who will perform the interventions (eg, surgeons, psychotherapists)                                                                                                                                                                                   | 6  |
| 2  |                              |                      |                                                                                                                                                                                                                                                                                                                                                                                |    |
| 3  |                              |                      |                                                                                                                                                                                                                                                                                                                                                                                |    |
| 4  |                              |                      |                                                                                                                                                                                                                                                                                                                                                                                |    |
| 5  |                              |                      |                                                                                                                                                                                                                                                                                                                                                                                |    |
| 6  | Interventions:               | <a href="#">#11a</a> | Interventions for each group with sufficient detail to allow replication, including how and when they will be administered                                                                                                                                                                                                                                                     | 8  |
| 7  | description                  |                      |                                                                                                                                                                                                                                                                                                                                                                                |    |
| 8  |                              |                      |                                                                                                                                                                                                                                                                                                                                                                                |    |
| 9  |                              |                      |                                                                                                                                                                                                                                                                                                                                                                                |    |
| 10 | Interventions:               | <a href="#">#11b</a> | Criteria for discontinuing or modifying allocated interventions for a given trial participant (eg, drug dose change in response to harms, participant request, or improving / worsening disease)                                                                                                                                                                               | 8  |
| 11 | modifications                |                      |                                                                                                                                                                                                                                                                                                                                                                                |    |
| 12 |                              |                      |                                                                                                                                                                                                                                                                                                                                                                                |    |
| 13 |                              |                      |                                                                                                                                                                                                                                                                                                                                                                                |    |
| 14 |                              |                      |                                                                                                                                                                                                                                                                                                                                                                                |    |
| 15 | Interventions:               | <a href="#">#11c</a> | Strategies to improve adherence to intervention protocols, and any procedures for monitoring adherence (eg, drug tablet return; laboratory tests)                                                                                                                                                                                                                              | 8  |
| 16 | adherence                    |                      |                                                                                                                                                                                                                                                                                                                                                                                |    |
| 17 |                              |                      |                                                                                                                                                                                                                                                                                                                                                                                |    |
| 18 |                              |                      |                                                                                                                                                                                                                                                                                                                                                                                |    |
| 19 |                              |                      |                                                                                                                                                                                                                                                                                                                                                                                |    |
| 20 |                              |                      |                                                                                                                                                                                                                                                                                                                                                                                |    |
| 21 | Interventions:               | <a href="#">#11d</a> | Relevant concomitant care and interventions that are permitted or prohibited during the trial                                                                                                                                                                                                                                                                                  | 8  |
| 22 | concomitant care             |                      |                                                                                                                                                                                                                                                                                                                                                                                |    |
| 23 |                              |                      |                                                                                                                                                                                                                                                                                                                                                                                |    |
| 24 |                              |                      |                                                                                                                                                                                                                                                                                                                                                                                |    |
| 25 | Outcomes                     | <a href="#">#12</a>  | Primary, secondary, and other outcomes, including the specific measurement variable (eg, systolic blood pressure), analysis metric (eg, change from baseline, final value, time to event), method of aggregation (eg, median, proportion), and time point for each outcome. Explanation of the clinical relevance of chosen efficacy and harm outcomes is strongly recommended | 9  |
| 26 |                              |                      |                                                                                                                                                                                                                                                                                                                                                                                |    |
| 27 |                              |                      |                                                                                                                                                                                                                                                                                                                                                                                |    |
| 28 |                              |                      |                                                                                                                                                                                                                                                                                                                                                                                |    |
| 29 |                              |                      |                                                                                                                                                                                                                                                                                                                                                                                |    |
| 30 |                              |                      |                                                                                                                                                                                                                                                                                                                                                                                |    |
| 31 |                              |                      |                                                                                                                                                                                                                                                                                                                                                                                |    |
| 32 |                              |                      |                                                                                                                                                                                                                                                                                                                                                                                |    |
| 33 |                              |                      |                                                                                                                                                                                                                                                                                                                                                                                |    |
| 34 | Participant timeline         | <a href="#">#13</a>  | Time schedule of enrolment, interventions (including any run-ins and washouts), assessments, and visits for participants. A schematic diagram is highly recommended (see Figure)                                                                                                                                                                                               | 9  |
| 35 |                              |                      |                                                                                                                                                                                                                                                                                                                                                                                |    |
| 36 |                              |                      |                                                                                                                                                                                                                                                                                                                                                                                |    |
| 37 |                              |                      |                                                                                                                                                                                                                                                                                                                                                                                |    |
| 38 |                              |                      |                                                                                                                                                                                                                                                                                                                                                                                |    |
| 39 |                              |                      |                                                                                                                                                                                                                                                                                                                                                                                |    |
| 40 | Sample size                  | <a href="#">#14</a>  | Estimated number of participants needed to achieve study objectives and how it was determined, including clinical and statistical assumptions supporting any sample size calculations                                                                                                                                                                                          | 11 |
| 41 |                              |                      |                                                                                                                                                                                                                                                                                                                                                                                |    |
| 42 |                              |                      |                                                                                                                                                                                                                                                                                                                                                                                |    |
| 43 |                              |                      |                                                                                                                                                                                                                                                                                                                                                                                |    |
| 44 |                              |                      |                                                                                                                                                                                                                                                                                                                                                                                |    |
| 45 | Recruitment                  | <a href="#">#15</a>  | Strategies for achieving adequate participant enrolment to reach target sample size                                                                                                                                                                                                                                                                                            | 7  |
| 46 |                              |                      |                                                                                                                                                                                                                                                                                                                                                                                |    |
| 47 |                              |                      |                                                                                                                                                                                                                                                                                                                                                                                |    |
| 48 |                              |                      |                                                                                                                                                                                                                                                                                                                                                                                |    |
| 49 | <b>Methods: Assignment</b>   |                      |                                                                                                                                                                                                                                                                                                                                                                                |    |
| 50 | <b>of interventions (for</b> |                      |                                                                                                                                                                                                                                                                                                                                                                                |    |
| 51 | <b>controlled trials)</b>    |                      |                                                                                                                                                                                                                                                                                                                                                                                |    |
| 52 |                              |                      |                                                                                                                                                                                                                                                                                                                                                                                |    |
| 53 |                              |                      |                                                                                                                                                                                                                                                                                                                                                                                |    |
| 54 | Allocation: sequence         | <a href="#">#16a</a> | Method of generating the allocation sequence (eg, computer-generated random numbers), and list of any factors for stratification. To reduce predictability of a random sequence, details of any planned restriction (eg, blocking) should be                                                                                                                                   | 8  |
| 55 | generation                   |                      |                                                                                                                                                                                                                                                                                                                                                                                |    |
| 56 |                              |                      |                                                                                                                                                                                                                                                                                                                                                                                |    |
| 57 |                              |                      |                                                                                                                                                                                                                                                                                                                                                                                |    |
| 58 |                              |                      |                                                                                                                                                                                                                                                                                                                                                                                |    |
| 59 |                              |                      |                                                                                                                                                                                                                                                                                                                                                                                |    |
| 60 |                              |                      |                                                                                                                                                                                                                                                                                                                                                                                |    |

provided in a separate document that is unavailable to those who enrol participants or assign interventions

|    |                        |                      |                                                                     |
|----|------------------------|----------------------|---------------------------------------------------------------------|
| 1  |                        |                      |                                                                     |
| 2  |                        |                      |                                                                     |
| 3  |                        |                      |                                                                     |
| 4  | Allocation             | <a href="#">#16b</a> | Mechanism of implementing the allocation sequence (eg, central      |
| 5  | concealment            |                      | telephone; sequentially numbered, opaque, sealed envelopes),        |
| 6  |                        |                      | describing any steps to conceal the sequence until interventions    |
| 7  | mechanism              |                      | are assigned                                                        |
| 8  |                        |                      |                                                                     |
| 9  |                        |                      |                                                                     |
| 10 |                        |                      |                                                                     |
| 11 | Allocation:            | <a href="#">#16c</a> | Who will generate the allocation sequence, who will enrol           |
| 12 | implementation         |                      | participants, and who will assign participants to interventions     |
| 13 |                        |                      |                                                                     |
| 14 | Blinding (masking)     | <a href="#">#17a</a> | Who will be blinded after assignment to interventions (eg, trial    |
| 15 |                        |                      | participants, care providers, outcome assessors, data analysts),    |
| 16 |                        |                      | and how                                                             |
| 17 |                        |                      |                                                                     |
| 18 |                        |                      |                                                                     |
| 19 |                        |                      |                                                                     |
| 20 | Blinding (masking):    | <a href="#">#17b</a> | If blinded, circumstances under which unblinding is permissible,    |
| 21 | emergency unblinding   |                      | and procedure for revealing a participant's allocated intervention  |
| 22 |                        |                      | during the trial                                                    |
| 23 |                        |                      |                                                                     |
| 24 |                        |                      |                                                                     |
| 25 | <b>Methods: Data</b>   |                      |                                                                     |
| 26 | <b>collection,</b>     |                      |                                                                     |
| 27 | <b>management, and</b> |                      |                                                                     |
| 28 | <b>analysis</b>        |                      |                                                                     |
| 29 |                        |                      |                                                                     |
| 30 |                        |                      |                                                                     |
| 31 |                        |                      |                                                                     |
| 32 | Data collection plan   | <a href="#">#18a</a> | Plans for assessment and collection of outcome, baseline, and       |
| 33 |                        |                      | other trial data, including any related processes to promote data   |
| 34 |                        |                      | quality (eg, duplicate measurements, training of assessors) and a   |
| 35 |                        |                      | description of study instruments (eg, questionnaires, laboratory    |
| 36 |                        |                      | tests) along with their reliability and validity, if known.         |
| 37 |                        |                      | Reference to where data collection forms can be found, if not in    |
| 38 |                        |                      | the protocol                                                        |
| 39 |                        |                      |                                                                     |
| 40 |                        |                      |                                                                     |
| 41 |                        |                      |                                                                     |
| 42 |                        |                      |                                                                     |
| 43 | Data collection plan:  | <a href="#">#18b</a> | Plans to promote participant retention and complete follow-up,      |
| 44 | retention              |                      | including list of any outcome data to be collected for participants |
| 45 |                        |                      | who discontinue or deviate from intervention protocols              |
| 46 |                        |                      |                                                                     |
| 47 |                        |                      |                                                                     |
| 48 | Data management        | <a href="#">#19</a>  | Plans for data entry, coding, security, and storage, including any  |
| 49 |                        |                      | related processes to promote data quality (eg, double data entry;   |
| 50 |                        |                      | range checks for data values). Reference to where details of data   |
| 51 |                        |                      | management procedures can be found, if not in the protocol          |
| 52 |                        |                      |                                                                     |
| 53 |                        |                      |                                                                     |
| 54 |                        |                      |                                                                     |
| 55 | Statistics: outcomes   | <a href="#">#20a</a> | Statistical methods for analysing primary and secondary             |
| 56 |                        |                      | outcomes. Reference to where other details of the statistical       |
| 57 |                        |                      | analysis plan can be found, if not in the protocol                  |
| 58 |                        |                      |                                                                     |
| 59 |                        |                      |                                                                     |
| 60 |                        |                      |                                                                     |



|    |                            |                      |                                                                    |    |
|----|----------------------------|----------------------|--------------------------------------------------------------------|----|
| 1  | Statistics: additional     | <a href="#">#20b</a> | Methods for any additional analyses (eg, subgroup and adjusted     | 12 |
| 2  | analyses                   |                      | analyses)                                                          |    |
| 3  |                            |                      |                                                                    |    |
| 4  | Statistics: analysis       | <a href="#">#20c</a> | Definition of analysis population relating to protocol non-        | 12 |
| 5  | population and missing     |                      | adherence (eg, as randomised analysis), and any statistical        |    |
| 6  | data                       |                      | methods to handle missing data (eg, multiple imputation)           |    |
| 7  |                            |                      |                                                                    |    |
| 8  |                            |                      |                                                                    |    |
| 9  |                            |                      |                                                                    |    |
| 10 | <b>Methods: Monitoring</b> |                      |                                                                    |    |
| 11 |                            |                      |                                                                    |    |
| 12 | Data monitoring:           | <a href="#">#21a</a> | Composition of data monitoring committee (DMC); summary of         | 12 |
| 13 | formal committee           |                      | its role and reporting structure; statement of whether it is       |    |
| 14 |                            |                      | independent from the sponsor and competing interests; and          |    |
| 15 |                            |                      | reference to where further details about its charter can be found, |    |
| 16 |                            |                      | if not in the protocol. Alternatively, an explanation of why a     |    |
| 17 |                            |                      | DMC is not needed                                                  |    |
| 18 |                            |                      |                                                                    |    |
| 19 |                            |                      |                                                                    |    |
| 20 |                            |                      |                                                                    |    |
| 21 |                            |                      |                                                                    |    |
| 22 | Data monitoring:           | <a href="#">#21b</a> | Description of any interim analyses and stopping guidelines,       | 12 |
| 23 | interim analysis           |                      | including who will have access to these interim results and make   |    |
| 24 |                            |                      | the final decision to terminate the trial                          |    |
| 25 |                            |                      |                                                                    |    |
| 26 |                            |                      |                                                                    |    |
| 27 | Harms                      | <a href="#">#22</a>  | Plans for collecting, assessing, reporting, and managing solicited | 12 |
| 28 |                            |                      | and spontaneously reported adverse events and other unintended     |    |
| 29 |                            |                      | effects of trial interventions or trial conduct                    |    |
| 30 |                            |                      |                                                                    |    |
| 31 |                            |                      |                                                                    |    |
| 32 |                            |                      |                                                                    |    |
| 33 | Auditing                   | <a href="#">#23</a>  | Frequency and procedures for auditing trial conduct, if any, and   | 12 |
| 34 |                            |                      | whether the process will be independent from investigators and     |    |
| 35 |                            |                      | the sponsor                                                        |    |
| 36 |                            |                      |                                                                    |    |
| 37 |                            |                      |                                                                    |    |
| 38 | <b>Ethics and</b>          |                      |                                                                    |    |
| 39 | <b>dissemination</b>       |                      |                                                                    |    |
| 40 |                            |                      |                                                                    |    |
| 41 |                            |                      |                                                                    |    |
| 42 | Research ethics            | <a href="#">#24</a>  | Plans for seeking research ethics committee / institutional review | 13 |
| 43 | approval                   |                      | board (REC / IRB) approval                                         |    |
| 44 |                            |                      |                                                                    |    |
| 45 |                            |                      |                                                                    |    |
| 46 | Protocol amendments        | <a href="#">#25</a>  | Plans for communicating important protocol modifications (eg,      | 13 |
| 47 |                            |                      | changes to eligibility criteria, outcomes, analyses) to relevant   |    |
| 48 |                            |                      | parties (eg, investigators, REC / IRBs, trial participants, trial  |    |
| 49 |                            |                      | registries, journals, regulators)                                  |    |
| 50 |                            |                      |                                                                    |    |
| 51 |                            |                      |                                                                    |    |
| 52 |                            |                      |                                                                    |    |
| 53 | Consent or assent          | <a href="#">#26a</a> | Who will obtain informed consent or assent from potential trial    | 7  |
| 54 |                            |                      | participants or authorised surrogates, and how (see Item 32)       |    |
| 55 |                            |                      |                                                                    |    |
| 56 |                            |                      |                                                                    |    |
| 57 |                            |                      |                                                                    |    |
| 58 |                            |                      |                                                                    |    |
| 59 |                            |                      |                                                                    |    |
| 60 |                            |                      |                                                                    |    |

|    |                          |                      |                                                                      |    |
|----|--------------------------|----------------------|----------------------------------------------------------------------|----|
| 1  | Consent or assent:       | <a href="#">#26b</a> | Additional consent provisions for collection and use of              | 7  |
| 2  | ancillary studies        |                      | participant data and biological specimens in ancillary studies, if   |    |
| 3  |                          |                      | applicable                                                           |    |
| 4  |                          |                      |                                                                      |    |
| 5  |                          |                      |                                                                      |    |
| 6  | Confidentiality          | <a href="#">#27</a>  | How personal information about potential and enrolled                | 7  |
| 7  |                          |                      | participants will be collected, shared, and maintained in order to   |    |
| 8  |                          |                      | protect confidentiality before, during, and after the trial          |    |
| 9  |                          |                      |                                                                      |    |
| 10 |                          |                      |                                                                      |    |
| 11 | Declaration of interests | <a href="#">#28</a>  | Financial and other competing interests for principal investigators  | 14 |
| 12 |                          |                      | for the overall trial and each study site                            |    |
| 13 |                          |                      |                                                                      |    |
| 14 |                          |                      |                                                                      |    |
| 15 | Data access              | <a href="#">#29</a>  | Statement of who will have access to the final trial dataset, and    | 12 |
| 16 |                          |                      | disclosure of contractual agreements that limit such access for      |    |
| 17 |                          |                      | investigators                                                        |    |
| 18 |                          |                      |                                                                      |    |
| 19 |                          |                      |                                                                      |    |
| 20 | Ancillary and post trial | <a href="#">#30</a>  | Provisions, if any, for ancillary and post-trial care, and for       | 12 |
| 21 | care                     |                      | compensation to those who suffer harm from trial participation       |    |
| 22 |                          |                      |                                                                      |    |
| 23 |                          |                      |                                                                      |    |
| 24 | Dissemination policy:    | <a href="#">#31a</a> | Plans for investigators and sponsor to communicate trial results     | 12 |
| 25 | trial results            |                      | to participants, healthcare professionals, the public, and other     |    |
| 26 |                          |                      | relevant groups (eg, via publication, reporting in results           |    |
| 27 |                          |                      | databases, or other data sharing arrangements), including any        |    |
| 28 |                          |                      | publication restrictions                                             |    |
| 29 |                          |                      |                                                                      |    |
| 30 |                          |                      |                                                                      |    |
| 31 |                          |                      |                                                                      |    |
| 32 |                          |                      |                                                                      |    |
| 33 | Dissemination policy:    | <a href="#">#31b</a> | Authorship eligibility guidelines and any intended use of            | 12 |
| 34 | authorship               |                      | professional writers                                                 |    |
| 35 |                          |                      |                                                                      |    |
| 36 |                          |                      |                                                                      |    |
| 37 | Dissemination policy:    | <a href="#">#31c</a> | Plans, if any, for granting public access to the full protocol,      | 12 |
| 38 | reproducible research    |                      | participant-level dataset, and statistical code                      |    |
| 39 |                          |                      |                                                                      |    |
| 40 |                          |                      |                                                                      |    |
| 41 | <b>Appendices</b>        |                      |                                                                      |    |
| 42 |                          |                      |                                                                      |    |
| 43 | Informed consent         | <a href="#">#32</a>  | Model consent form and other related documentation given to          | 3  |
| 44 | materials                |                      | participants and authorised surrogates                               |    |
| 45 |                          |                      |                                                                      |    |
| 46 |                          |                      |                                                                      |    |
| 47 | Biological specimens     | <a href="#">#33</a>  | Plans for collection, laboratory evaluation, and storage of          | 9  |
| 48 |                          |                      | biological specimens for genetic or molecular analysis in the        |    |
| 49 |                          |                      | current trial and for future use in ancillary studies, if applicable |    |
| 50 |                          |                      |                                                                      |    |
| 51 |                          |                      |                                                                      |    |

The SPIRIT checklist is distributed under the terms of the Creative Commons Attribution License CC-BY-ND 3.0. This checklist was completed on 26. March 2020 using <https://www.goodreports.org/>, a tool made by the [EQUATOR Network](#) in collaboration with [Penelope.ai](#)
