# Supplementary material for: Faecal microbiota transplant to ERadicate gastrointestinal carriage of Antibiotic Resistant Organisms (FERARO): a prospective, randomised placebo-controlled feasibility trial
Source: PubMed Central journal article supplement (PMC7252984; doi:10.1136/bmjopen-2020-038847), 2020-05-25
Supplement: bmjopen-2020-038847.reviewer_comments.pdf [file bmjopen-2020-038847.reviewer_comments.pdf]

## PEER REVIEW HISTORY

BMJ Open publishes all reviews undertaken for accepted manuscripts. Reviewers are asked to complete a checklist review form (<http://bmjopen.bmj.com/site/about/resources/checklist.pdf>) and are provided with free text boxes to elaborate on their assessment. These free text comments are reproduced below.

## ARTICLE DETAILS

|                            |                                                                                                                                                                                                        |
|----------------------------|--------------------------------------------------------------------------------------------------------------------------------------------------------------------------------------------------------|
| <b>TITLE (PROVISIONAL)</b> | Protocol: A prospective, randomised placebo-controlled feasibility trial of Faecal microbiota Transplant to ERadicate gastrointestinal carriage of Antibiotic Resistant Organisms (FERARO)             |
| <b>AUTHORS</b>             | Merrick, Blair; Robinson, Emily; Bunce, Catey; Allen, Liz; Blsnauthsing, Karen; Izundu, Chi Chi; Bell, Jordana; Amos, Gregory; Shankar-Hari, Manu; Goodman, Anna; Shawcross, Debbie; Goldenberg, Simon |

This article was not externally reviewed at BMJ Open. Protocols that have been independently assessed prior to submission to BMJ Open are usually fast-tracked to publication on the grounds that further substantial changes will not be possible. This independent assessment will usually be external, independent review for both a substantial grant award from a non-commercial or government funder and ethics approval.
